# Supplementary material for: Establishment of in vitro regeneration system and molecular analysis of early development of somatic callus in Capsicum chinense and Capsicum baccatum
Source: Front Plant Sci. 2022 Nov 17;13:1025497. doi: 10.3389/fpls.2022.1025497 (PMC9714296; doi:10.3389/fpls.2022.1025497)
Supplement: Supplementary file 1 [file Table_1.xlsx]

## Sheet: Buds induction
Supplementary Table S1. Induction of adventitious buds in pepper.
Medium number	6-BA contents (µM)	IAA contents (µM)	TDZ contents (µM)	Somatic callus induction rate (%)
				HNUCB81	HNUCB226	HNUCC22	HNUCC16
B1	4.44	0.57	0	8.73±0.23d	6.67±1.53g	0e	0e
B2	4.44	1.71	0	13.33±1.29d	32.67±0.23c	4.00±0.41d	3.19 ±0.31de
B3	4.44	2.85	0	5.33±0.61d	24.31±1.26d	0e	5.97±0.33de
B4	13.32	0.57	0	57.89±1.41b	52.86±1.3b	48.06±1.49a	37.33±1.4a
B5	13.32	1.71	0	25.78±1.37d	28.57±1.24cd	36.10±1.19b	28.88±0.49b
B6	13.32	2.85	0	72.58±2.86a	66.22±2.60a	34.75±1.21b	20.78±0.68c
B7	22.2	0.57	0	36.67±1.31c	17.46±1.67e	34.52±1.46b	19.18±0.83c
B8	22.2	1.71	0	42.83±3.18b	26.00±1.53d	38.76±1.24b	24.17±0.38bc
B9	22.2	2.85	0	44.89±1.62b	37.23±1.53c	30.48±1.48b	30.73±0.80ab
B10	0	0	4.54	4.02±0.9d	0h	0e	0f
B11	0	0	9.08	14.67±1.61cd	10.67±1.34f	7.94±0.18cd	10.67±0.47d
B12	0	0	18.16	4.00±0.4d	2.67±1.07g	1.11±0.19d	0f
