# Supplementary material for: Establishment of in vitro regeneration system and molecular analysis of early development of somatic callus in Capsicum chinense and Capsicum baccatum
Source: Front Plant Sci. 2022 Nov 17;13:1025497. doi: 10.3389/fpls.2022.1025497 (PMC9714296; doi:10.3389/fpls.2022.1025497)
Supplement: Supplementary file 2 [file Table_2.xlsx]

## Sheet: buds elongation
Supplementary Table S2.Elongation of adventitious shoots in pepper
Medium number	6-BA contents (µM)	IAA contents (µM)	GA3 contents (µM)	Shoot elongation rate (%)
				HNUCB81	HNUCB226	HNUCC22	HNUCC16
E1	13.32	2.85	0	0f	0e	3.23±1.55c	0e
E2	13.32	2.85	5.78	0f	0e	3.7±1.64c	0e
E3	13.32	2.85	11.55	1.85±0.92ef	15.45±1.16c	2.81±1.33c	2.93±2.93d
E4	13.32	5.71	0	54.55±2.4b	26.82±1.6b	21.13±1.87b	3.03±3.03cd
E5	13.32	5.71	5.78	74.27±2.16a	60±2.6a	27.36±1.84b	26.37±1.37b
E6	13.32	5.71	11.55	12.87±1.63cd	10.23±0.93cd	66.78±2.55a	64.61±1.52a
E7	22.2	2.85	0	8.45±1.02de	0e	11.38±1.21bc	9.01±1.56c
E8	22.2	2.85	5.78	16.11±1.79c	6.67±1.15d	16.11±1.67b	0e
E9	22.2	2.85	11.55	0f	7.5±0.66d	0d	3.38±1.09cd
E10	22.2	5.71	0	0f	11.11±1.02cd	0d	0e
E11	22.2	5.71	5.78	3.70±0.64ef	0e	2.78±0.58c	4.13±1.58cd
E12	22.2	5.71	11.55	0f	0e	0d	0e
