# Supplementary material for: Establishment of in vitro regeneration system and molecular analysis of early development of somatic callus in Capsicum chinense and Capsicum baccatum
Source: Front Plant Sci. 2022 Nov 17;13:1025497. doi: 10.3389/fpls.2022.1025497 (PMC9714296; doi:10.3389/fpls.2022.1025497)
Supplement: Supplementary file 3 [file Table_3.xlsx]

## Sheet: roots induction
Supplementary Table S3. Induction of roots in pepper.
Medium number	IAA contents (µM)	NAA contents (µM)	Roots induction rate (%)
			HNUCB81	HNUCB226	HNUCC22	HNUCC16
R1	0.57	0	12.73±1.58d	18.98±1.95de	60.83±1.2b	64.01±1.35b
R2	1.14	0	66.99±2.55a	68.8±1.44a	83.08 ±2.6a	89.88±2.43a
R3	2.85	0	3.70±1.64e	10.66±1.46f	55.17±1.47b	69.80±3.45b
R4	0	0.54	57.89±2.8b	21.13±1.87c	51.10±1.76bc	46.1±1.36cd
R5	0	1.07	63.55±3.61a	54.67±2.93b	42.71±1.72c	54.68±2.5c
R6	0	2.69	41.98±1.41c	17.36±1.84de	41.73±2.21c	40.94±1.71d
