# Supplementary material for: Establishment of in vitro regeneration system and molecular analysis of early development of somatic callus in Capsicum chinense and Capsicum baccatum
Source: Front Plant Sci. 2022 Nov 17;13:1025497. doi: 10.3389/fpls.2022.1025497 (PMC9714296; doi:10.3389/fpls.2022.1025497)
Supplement: Supplementary file 4 [file Table_4.xlsx]

## Sheet: mapped 
Supplementary Table S4. Quality assessment and mapping of sequencing data.
sample	raw_reads	clean_reads	clean_bases	total_map	unique_map	error_rate %	Q20 %	Q30 %	GC %
HNUCB81_S1_1	46926066	43834592	6.58G	36937358(84.27%)	35874025(81.84%)	0.03	97.33	92.46	42.11
HNUCB81_S1_2	45747066	44444966	6.67G	36557013(82.25%)	35588656(80.07%)	0.03	97.25	92.25	41.44
HNUCB81_S1_3	42618176	41467168	6.22G	34901948(84.17%)	33749955(81.39%)	0.03	97.43	92.68	41.94
HNUCB81_S2_1	43733058	42364714	6.35G	35614338(84.07%)	34337561(81.05%)	0.03	97.32	92.35	42.25
HNUCB81_S2_2	45923262	44787482	6.72G	37155700(82.96%)	35944496(80.26%)	0.03	97.28	92.34	42.02
HNUCB81_S2_3	40899310	39672976	5.95G	33634125(84.78%)	32685879(82.39%)	0.03	97.31	92.33	42.01
HNUCB81_S3_1	49479466	46399312	6.96G	38686497(83.38%)	37445040(80.7%)	0.03	97.5	92.81	42.06
HNUCB81_S3_2	43159978	40525926	6.08G	34202479(84.4%)	33181038(81.88%)	0.03	97.38	92.53	42.19
HNUCB81_S3_3	42736682	40652116	6.1G	34129810(83.96%)	33028887(81.25%)	0.03	97.25	92.25	42.25
HNUCB226_S1_1	42937030	41124840	6.17G	35689868(86.78%)	33969339(82.6%)	0.03	97.43	92.57	42.91
HNUCB226_S1_2	44192730	43167884	6.48G	37462701(86.78%)	35921334(83.21%)	0.03	97.54	92.85	42.81
HNUCB226_S1_3	43449590	41594282	6.24G	35786203(86.04%)	34434933(82.79%)	0.03	97.45	92.62	42.27
HNUCB226_S2_1	42702490	41354964	6.2G	34732101(83.99%)	33600277(81.25%)	0.03	97.42	92.61	41.78
HNUCB226_S2_2	47553522	45849812	6.88G	37801455(82.45%)	36508132(79.63%)	0.03	97.07	91.76	41.75
HNUCB226_S2_3	48180322	46531628	6.98G	38439716(82.61%)	37153009(79.84%)	0.03	97.36	92.44	41.58
HNUCB226_S3_1	42777590	41598714	6.24G	34390541(82.67%)	33184311(79.77%)	0.03	97.4	92.58	41.8
HNUCB226_S3_2	42678912	41453302	6.22G	34685132(83.67%)	33669628(81.22%)	0.03	97.51	92.79	41.92
HNUCB226_S3_3	43768126	42447546	6.37G	35356223(83.29%)	34246056(80.68%)	0.03	97.38	92.5	41.97
HNUCC22_S1_1	41524042	40197842	6.03G	37813575(94.07%)	35815458(89.1%)	0.03	97.55	92.89	42.8
HNUCC22_S1_2	42992472	40456742	6.07G	37852642(93.56%)	35987804(88.95%)	0.03	97.65	93.07	42.36
HNUCC22_S1_3	42985332	40952828	6.14G	38218807(93.32%)	36435014(88.97%)	0.03	97.29	92.34	42.66
HNUCC22_S2_1	46225818	44087684	6.61G	41001440(93.0%)	39351965(89.26%)	0.03	97.83	93.55	42.36
HNUCC22_S2_2	43089780	40070990	6.01G	36483316(91.05%)	34992334(87.33%)	0.03	97.37	92.48	42.54
HNUCC22_S2_3	44857166	40372904	6.06G	37081489(91.85%)	35692968(88.41%)	0.03	97.77	93.52	42.44
HNUCC22_S3_1	44385394	40197554	6.03G	37209704(92.57%)	35675783(88.75%)	0.03	97.72	93.37	41.99
HNUCC22_S3_2	45336132	43914816	6.59G	40865721(93.06%)	39447811(89.83%)	0.03	97.26	92.32	41.84
HNUCC22_S3_3	40379674	39221700	5.88G	36412994(92.84%)	34929950(89.06%)	0.03	97.19	92.16	41.96
HNUCC16_S1_1	44765608	43486022	6.52G	40799735(93.82%)	37984546(87.35%)	0.03	97.27	92.31	43.37
HNUCC16_S1_2	43137492	41990342	6.3G	39170298(93.28%)	36597769(87.16%)	0.03	97.4	92.59	43.02
HNUCC16_S1_3	45648808	44309916	6.65G	41488482(93.63%)	38860833(87.7%)	0.03	97.45	92.68	43.07
HNUCC16_S2_1	43781606	41995258	6.3G	38850411(92.51%)	37559723(89.44%)	0.03	97.27	92.26	42.07
HNUCC16_S2_2	47302480	44057880	6.61G	40046274(90.89%)	38315241(86.97%)	0.03	97.24	92.27	41.72
HNUCC16_S2_3	42880010	40374380	6.06G	37605344(93.14%)	36571440(90.58%)	0.03	97.36	92.46	41.46
HNUCC16_S3_1	45842766	43464414	6.52G	39787075(91.54%)	38124841(87.72%)	0.03	97.4	92.67	42.29
HNUCC16_S3_2	43338790	41032682	6.15G	37527978(91.46%)	36044507(87.84%)	0.03	97.28	92.41	42.21
HNUCC16_S3_3	41340388	39505646	5.93G	36585703(92.61%)	35344435(89.47%)	0.03	97.19	92.05	42.5
