# Supplementary material for: Establishment of in vitro regeneration system and molecular analysis of early development of somatic callus in Capsicum chinense and Capsicum baccatum
Source: Front Plant Sci. 2022 Nov 17;13:1025497. doi: 10.3389/fpls.2022.1025497 (PMC9714296; doi:10.3389/fpls.2022.1025497)
Supplement: Supplementary file 5 [file Table_5.xlsx]

## Sheet: lightcyan module
Supplementary Table S5. Information of DEG in lightcyan module.
Gene_id	Description	TF_family
BC332_27087	Fruit-specific protein	-
BC332_12166	Expansin-A1	-
BC332_26299	hypothetical protein	-
BC332_20850	hypothetical protein	-
BC332_14731	Protein RALF-like 34	-
BC332_23853	hypothetical protein	Usp
BC332_00830	hypothetical protein	-
BC332_11502	Homeobox-leucine zipper protein HOX20	Homeobox
BC332_31376	hypothetical protein	-
BC332_08954	Nucleobase-ascorbate transporter 8	-
BC332_31958	hypothetical protein	-
novel.5427	-	-
BC332_22888	Endoglucanase 8	-
BC332_17235	hypothetical protein	-
BC332_22896	Peptidyl-prolyl cis-trans isomerase-like 1	Pro_isomerase
BC332_22271	hypothetical protein	-
BC332_24999	Protein transport protein Sec61 subunit alpha	-
BC332_06126	Very-long-chain 3-oxoacyl-CoA reductase 1	adh_short
BC332_31338	hypothetical protein	ChaC
BC332_21201	hypothetical protein	Cu_bind_like
BC332_27837	Transcription factor PRE4	-
BC332_10856	Long chain base biosynthesis protein 1	Aminotran_1_2
BC332_15545	hypothetical protein	-
BC332_09590	hypothetical protein	-
BC332_09228	hypothetical protein	-
BC332_15049	Early light-induced protein%2C chloroplastic	-
BC332_00480	hypothetical protein	-
BC332_22126	Auxin response factor 7	Auxin_resp
BC332_10445	RuvB-like 2	-
BC332_07137	Endoglucanase 1	-
BC332_03066	Phosphatidylinositol N-acetylglucosaminyltransferase subunit P	-
BC332_32975	hypothetical protein	-
BC332_04457	putative prolyl 4-hydroxylase 9	-
BC332_08759	hypothetical protein	-
BC332_19146	Peroxidase 3	-
BC332_06037	ABC transporter B family member 1	ABC_membrane
BC332_08414	Transcription factor YY2	-
BC332_30093	hypothetical protein	-
BC332_10875	hypothetical protein	-
BC332_05271	hypothetical protein	-
BC332_15819	hypothetical protein	Usp
novel.7368	-	-
BC332_06010	Peptidyl-tRNA hydrolase 2%2C mitochondrial	PTH2
BC332_00388	Transcription factor bHLH35	HLH
BC332_24239	B-box zinc finger protein 32	-
BC332_05446	Kinesin-like protein NACK2	Kinesin
BC332_17473	Root meristem growth factor 6	-
novel.12154	-	-
BC332_02177	GDSL esterase/lipase	Lipase_GDSL
BC332_18821	Peroxidase 28	-
BC332_29629	putative beta-1%2C4-xylosyltransferase IRX14H	-
BC332_11627	hypothetical protein	-
BC332_22390	hypothetical protein	-
BC332_02738	hypothetical protein	-
BC332_09508	Pentatricopeptide repeat-containing protein	-
BC332_02055	Glutaredoxin-C8	-
BC332_19410	Protein LIGHT-DEPENDENT SHORT HYPOCOTYLS 10	-
BC332_09452	hypothetical protein	-
BC332_22660	Auxin-responsive protein SAUR21	-
BC332_26988	Cytochrome 98A2	p450
BC332_30829	Endoglucanase 2	-
BC332_17491	hypothetical protein	-
BC332_15989	putative protein phosphatase 2C 64	PP2C
BC332_20758	F-box protein SKIP19	-
BC332_11631	MADS-box protein SVP	SRF-TF
BC332_24661	Glucan endo-1%2C3-beta-glucosidase 12	Glyco_hydro_17
BC332_05766	Basic leucine zipper 43	bZIP_1
BC332_04373	hypothetical protein	Pkinase
BC332_09811	hypothetical protein	-
BC332_16717	hypothetical protein	-
BC332_12160	GDSL esterase/lipase EXL2	Lipase_GDSL
BC332_29446	Serine carboxypeptidase-like 2	Peptidase_S10
BC332_07157	Auxin-responsive protein SAUR20	-
novel.9297	-	-
BC332_06221	hypothetical protein	-
BC332_14643	NAC domain-containing protein 76	-
BC332_19761	putative glutathione S-transferase parC	GST_N
BC332_12617	hypothetical protein	-
BC332_31043	Branched-chain-amino-acid aminotransferase 1%2C mitochondrial	-
BC332_25560	Outer envelope protein 64%2C mitochondrial	Amidase
BC332_19735	CytochromeB1	p450
BC332_10598	Peroxisome biogenesis protein 1	AAA
BC332_10516	Auxin-induced protein X10A	Auxin_inducible
BC332_16338	Cytochrome 94A2	p450
BC332_03789	hypothetical protein	-
novel.2951	-	-
BC332_05631	hypothetical protein	-
BC332_33179	Basic blue protein	Cu_bind_like
BC332_16718	hypothetical protein	-
BC332_09690	hypothetical protein	-
novel.7692	-	-
BC332_15493	hypothetical protein	-
BC332_16825	hypothetical protein	HLH
BC332_29567	Auxin-responsive protein SAUR20	Auxin_inducible
BC332_09398	hypothetical protein	-
BC332_27281	Protein NRT1/ PTR FAMILY 3.1	-
novel.8130	-	-
BC332_11408	hypothetical protein	-
BC332_00031	Endoglucanase 3	-
BC332_11754	hypothetical protein	-
BC332_29560	Auxin-responsive protein SAUR67	Auxin_inducible
BC332_16547	putative inactive receptor kinase	Pkinase
BC332_09190	Gibberellin-regulated protein 6	-
BC332_24725	hypothetical protein	Auxin_inducible
BC332_09779	hypothetical protein	-
BC332_03038	hypothetical protein	p450
BC332_06943	hypothetical protein	-
novel.9377	-	-
BC332_33980	hypothetical protein	-
BC332_26426	putative uridine nucleosidase 2	-
BC332_22664	Auxin-induced protein 15A	-
BC332_04023	Protein EXORDIUM-like 7	-
BC332_19898	Beta-(1%2C2)-xylosyltransferase	-
BC332_00526	hypothetical protein	-
BC332_08203	Short-chain dehydrogenase TIC 32%2C chloroplastic	adh_short
BC332_29562	Auxin-responsive protein SAUR20	-
BC332_05682	putative calcium-binding protein CML13	-
BC332_21972	putative pectinesterase/pectinesterase inhibitor 25	-
BC332_11322	hypothetical protein	Pkinase
BC332_08327	putative trehalose-phosphate phosphatase 2	-
BC332_29518	Auxin-responsive protein SAUR20	-
BC332_07745	Protein G1-like6	-
BC332_22667	Auxin-induced protein 15A	-
BC332_03008	putative WRKY transcription factor 12	WRKY
BC332_29581	Auxin-responsive protein SAUR65	Auxin_inducible
BC332_07153	Indole-3-acetic acid-induced protein ARG7	Auxin_inducible
BC332_29569	Auxin-responsive protein SAUR20	-
BC332_31446	hypothetical protein	-
BC332_13100	hypothetical protein	-
BC332_02737	hypothetical protein	-
BC332_33640	Abscisic acid 8'-hydroxylase 3	p450
BC332_07746	Protein CUP-SHAPED COTYLEDON 3	NAM
BC332_09060	Cytochrome 78A5	p450
novel.3660	-	-
BC332_19865	Fasciclin-like arabinogalactan protein 1	-
novel.10663	-	-
BC332_03076	Protein CER1-like 1	-
BC332_12741	GRF1-interacting factor 1	SSXT
BC332_01899	hypothetical protein	-
BC332_17352	hypothetical protein	-
BC332_10050	COP9 signalosome complex subunit 3	-
BC332_30439	GDSL esterase/lipase	Lipase_GDSL
BC332_27722	hypothetical protein	-
BC332_25611	Non-specific lipid-transfer protein 2	-
novel.11774	-	-
BC332_29575	Auxin-responsive protein SAUR65	Auxin_inducible
BC332_26849	hypothetical protein	NB-ARC
BC332_13698	hypothetical protein	-
BC332_28229	DNA topoisomerase 3-alpha	Topoisom_bac
BC332_26309	Aquaporin PIP2-4	-
BC332_27239	hypothetical protein	-
novel.10556	-	-
BC332_00448	hypothetical protein	p450
BC332_22662	Indole-3-acetic acid-induced protein ARG7	-
BC332_22835	hypothetical protein	Homeobox
BC332_30411	hypothetical protein	-
BC332_19314	Zinc finger CCCH domain-containing protein 49	zf-CCCH
BC332_23365	Aspartic proteinase PCS1	-
BC332_03130	Squamosa promoter-binding-like protein 10	SBP
novel.7321	-	-
BC332_27563	hypothetical protein	-
BC332_22550	hypothetical protein	IBR
BC332_16558	Piriformospora indica-insensitive protein 2	-
BC332_23880	Leucine-rich repeat receptor-like protein kinase PXL1	Pkinase
BC332_09540	hypothetical protein	AP2
BC332_08637	Growth-regulating factor 7	-
BC332_09041	hypothetical protein	-
BC332_08422	hypothetical protein	-
BC332_21330	Pleiotropic drug resistance protein 3	ABC2_membrane
BC332_22874	hypothetical protein	-
novel.7398	-	-
BC332_13648	GDSL esterase/lipase	Lipase_GDSL
novel.1540	-	-
BC332_22072	hypothetical protein	-
BC332_33247	hypothetical protein	ADH_zinc_N
BC332_25633	Dehydration-responsive element-binding protein 2A	AP2
novel.11759	-	-
BC332_15862	putative aquaporin TIP-type RB7-5A	-
novel.12313	-	-
novel.6151	-	-
BC332_25437	hypothetical protein	-
novel.11312	-	-
BC332_16542	hypothetical protein	-
BC332_20882	hypothetical protein	-
novel.567	-	-
novel.3118	-	-
novel.6194	-	-
BC332_33056	hypothetical protein	-
BC332_08900	hypothetical protein	DUF295
BC332_06705	hypothetical protein	-
BC332_33813	Protein TAR1	-
BC332_16719	GDP-mannose transporter GONST3	RVT_2
BC332_26793	Villin-4	-
BC332_02591	Protein trichome birefringence-like 38	-
novel.1392	-	-
BC332_01292	Protein CER1-like 1	-
BC332_13266	hypothetical protein	HSP70
BC332_07084	Beta-glucosidase 10	Glyco_hydro_1
BC332_13869	Amino acid permease 2	Aa_trans
BC332_34782	putative late blight resistance protein -like protein R1B-14	NB-ARC

## Sheet: lightyellow module
Supplementary Table S5. Information of DEG in lightyellow module.
Gene_id	Description	TF_family
BC332_18263	Defensin-like protein	-
BC332_33451	hypothetical protein	-
BC332_16833	Bidirectional sugar transporter SWEET11	-
BC332_18121	EG45-like domain containing protein	-
novel.6759	-	-
novel.11442	-	-
BC332_24260	hypothetical protein	Aconitase
BC332_29129	Dirigent protein 21	-
BC332_12672	hypothetical protein	-
BC332_17493	Adenine phosphoribosyltransferase 4	Pribosyltran
BC332_23181	putative protein phosphatase 2C 48	PP2C
BC332_18004	hypothetical protein	-
BC332_08582	8-hydroxyquercetin 8-O-methyltransferase	-
novel.5170	-	-
BC332_11169	hypothetical protein	-
BC332_21287	Non-specific lipid-transfer protein	-
BC332_30367	Sodium/hydrogen exchanger 5	Na_H_Exchanger
BC332_29198	hypothetical protein	-
BC332_20033	Indole-3-acetic acid-amido synthetase GH3.6	-
BC332_15787	L-ascorbate peroxidase T%2C chloroplastic	-
BC332_04779	DNA-directed RNA polymerase II subunit RPB2	RNA_pol_Rpb2_6
BC332_32185	hypothetical protein	-
BC332_14760	Ubiquitin-activating enzyme E1 2	-
BC332_15069	Protein argonaute 10	Piwi
BC332_12697	hypothetical protein	-
BC332_32011	hypothetical protein	-
BC332_06879	Glutathione S-transferase U9	GST_N
BC332_18760	Transcriptional adapter ADA2a	Myb_DNA-binding
BC332_05833	Transcription factor TCP17	TCP
BC332_03483	Thermospermine synthase ACAULIS5	-
BC332_23224	hypothetical protein	NAD_binding_4
novel.1911	-	-
BC332_10980	Protease Do-like 9	-
BC332_13559	Protein cornichon -like protein 4	-
BC332_14449	hypothetical protein	-
BC332_06026	Mini zinc finger protein 1	-
BC332_09924	Pleiotropic drug resistance protein 12	ABC2_membrane
BC332_23815	hypothetical protein	-
BC332_33274	UDP-glucose:glycoprotein glucosyltransferase	-
BC332_18466	L-arabinokinase	-
BC332_23814	hypothetical protein	-
BC332_08406	hypothetical protein	JmjC
BC332_25718	hypothetical protein	-
BC332_15363	hypothetical protein	-
BC332_16707	hypothetical protein	-
BC332_08484	Cytochrome 89A9	p450
novel.2726	-	-
BC332_10921	Calmodulin-binding transcription activator 1	CG-1
BC332_08050	hypothetical protein	-
BC332_08334	hypothetical protein	-
BC332_01774	3-hydroxyisobutyryl-CoA hydrolase-like protein 5	-
BC332_01599	hypothetical protein	Pkinase
BC332_29797	Peroxidase 17	-
BC332_00707	hypothetical protein	-
BC332_00213	3-oxoacyl-[acyl-carrier-protein] synthase I%2C chloroplastic	ketoacyl-synt
BC332_09960	hypothetical protein	-
novel.2020	-	-
BC332_09800	hypothetical protein	-
BC332_15969	hypothetical protein	-
BC332_12391	Glucan endo-1%2C3-beta-glucosidase	Glyco_hydro_17
novel.7648	-	-
BC332_24311	(-)-germacrene D synthase	-
BC332_11620	hypothetical protein	-
BC332_06372	hypothetical protein	-
BC332_28314	hypothetical protein	RWD
BC332_16171	hypothetical protein	-
BC332_22879	hypothetical protein	Pkinase
novel.3148	-	-
BC332_25642	hypothetical protein	-
BC332_16893	hypothetical protein	2OG-FeII_Oxy
BC332_05190	putative acyl-activating enzyme 2	AMP-binding
BC332_04479	putative Myb family transcription factor	Myb_DNA-binding
BC332_11050	ATP synthase subunit 9%2C mitochondrial	-
BC332_24623	Hexokinase-2	-
BC332_12892	hypothetical protein	-
BC332_04595	WUSCHEL-related homeobox 7	Homeobox
BC332_32346	Pyrophosphate-energized vacuolar membrane proton pump	-
BC332_08117	Leucine-rich repeat receptor protein kinase EMS1	Pkinase
BC332_30528	hypothetical protein	-
novel.7011	-	-
BC332_27357	Transcription factor TCP1	TCP
BC332_05947	Receptor-like protein kinase ANXUR2	Pkinase_Tyr
BC332_13492	Transcription factor TCP12	TCP
BC332_30890	hypothetical protein	-
BC332_15734	Acyl-[acyl-carrier-protein] desaturase 1%2C chloroplastic	-
BC332_25493	Squamosa promoter-binding-like protein 10	SBP
novel.11053	-	-
novel.307	-	-
novel.10636	-	-
BC332_04084	hypothetical protein	-
novel.130	-	-
novel.6144	-	-
BC332_03607	60S ribosomal protein L13-1	-
BC332_05606	LRR receptor-like serine/threonine-protein kinase HSL2	LRRNT_2
novel.7587	-	-
novel.8542	-	-
BC332_25902	hypothetical protein	POX
novel.850	-	-
novel.8151	-	-
BC332_13062	hypothetical protein	Pkinase_Tyr
BC332_04156	Lysine-specific demethylase JMJ18	JmjN
novel.10309	-	-
novel.9039	-	-
BC332_26054	Beta-fructofuranosidase%2C insoluble isoenzyme 1	-
BC332_29160	hypothetical protein	NB-ARC
BC332_11663	hypothetical protein	-
BC332_31256	hypothetical protein	-

## Sheet: midnightblue module
Supplementary Table S5. Information of DEG in lightyellow module.
Gene_id	Description	TF_family
BC332_17847	hypothetical protein	-
BC332_22676	Snakin-2	-
BC332_27570	Chitin-binding lectin 1	-
BC332_04791	Stem-specific protein TSJT1	-
BC332_00654	Bax inhibitor 1	-
BC332_06882	Auxin-responsive protein IAA16	-
BC332_08429	Zinc finger protein CONSTANS-LIKE 5	CCT
BC332_08268	hypothetical protein	-
BC332_22256	Thioredoxin M3%2C chloroplastic	-
BC332_19909	Syntaxin	SNARE
BC332_09558	hypothetical protein	-
BC332_08938	Homeobox-leucine zipper protein HOX5	Homeobox
BC332_19809	putative amino acid permease 7	Aa_trans
BC332_31111	hypothetical protein	-
BC332_04063	Ras-related protein RABF2a	Ras
BC332_18346	hypothetical protein	-
BC332_27586	HVA22-like protein c	TB2_DP1_HVA22
BC332_13153	Peroxisomal nicotinamide adenine dinucleotide carrier	Mito_carr
BC332_23622	Alpha-glucan phosphorylase%2C H isozyme	-
BC332_23133	hypothetical protein	-
BC332_21528	hypothetical protein	-
BC332_04465	Peroxidase 73	-
BC332_04257	Cold-regulated inner membrane protein 2%2C chloroplastic	-
BC332_17090	Tetraspanin-3	Tetraspannin
BC332_32548	Plasma membrane ATPase 1	E1-E2_ATPase
BC332_29078	4-coumarate--CoA ligase-like 7	AMP-binding
BC332_18972	hypothetical protein	SAM_2
BC332_12533	hypothetical protein	-
BC332_32044	Methionine aminopeptidase 2	Peptidase_M24
BC332_17480	pEARLI1-like lipid transfer protein 2	-
BC332_33277	hypothetical protein	-
BC332_33634	hypothetical protein	Abhydrolase_3
novel.8991	-	-
BC332_05138	Autophagy-related protein 8C	-
BC332_24378	hypothetical protein	SAM_2
BC332_02565	hypothetical protein	-
BC332_03982	hypothetical protein	Pkinase_Tyr
BC332_01432	Formate--tetrahydrofolate ligase	-
BC332_02941	hypothetical protein	-
BC332_19074	hypothetical protein	-
BC332_08800	hypothetical protein	-
BC332_05521	hypothetical protein	-
BC332_09592	Protein phosphatase 2C 16	PP2C
BC332_18333	hypothetical protein	Cu_bind_like
novel.2012	-	-
BC332_10056	Cystinosin -like protein	-
BC332_21431	hypothetical protein	-
BC332_07295	Gibberellin receptor GID1	Abhydrolase_3
BC332_15839	Protein NRT1/ PTR FAMILY 6.3	-
BC332_04855	Zinc finger protein CONSTANS-LIKE 13	zf-B_box
BC332_15474	hypothetical protein	START
BC332_28133	hypothetical protein	-
novel.12915	-	-
BC332_08289	hypothetical protein	-
BC332_22056	Nectarin-1	-
BC332_18069	Cation/calcium exchanger 1	Na_Ca_ex
BC332_31980	BEL1-like homeodomain protein 3	POX
novel.23	-	-
BC332_19159	hypothetical protein	Usp
BC332_03345	BTB/POZ domain-containing protein	BTB
BC332_02470	putative WRKY transcription factor 28	WRKY
BC332_06452	hypothetical protein	-
BC332_11452	Heavy metal-associated isoprenylated plant protein 26	HMA
BC332_00770	NAC domain-containing protein 45	NAM
BC332_03421	Villin-5	-
BC332_08693	Histone acetyltransferase MCC1	Acetyltransf_1
BC332_22325	Reticulon-like protein B10	-
BC332_07899	hypothetical protein	-
BC332_24759	Shikimate O-hydroxycinnamoyltransferase	-
BC332_02448	hypothetical protein	-
BC332_02634	hypothetical protein	-
BC332_03297	hypothetical protein	-
BC332_00682	Serine/threonine-protein kinase SAPK3	Pkinase
novel.5699	-	-
BC332_18609	Regulatory protein NPR2	BTB
novel.2552	-	-
BC332_19260	Riboflavin synthase	-
novel.11778	-	-
BC332_05760	Calcium uniporter protein 1%2C mitochondrial	-
BC332_19575	putative protein phosphatase 2C 39	PP2C
BC332_11880	Metal transporter Nramp5	-
BC332_19563	hypothetical protein	-
BC332_14484	putative histone-arginine methyltransferase CARM1	-
BC332_34902	Pectinesterase 2.2	-
BC332_14376	hypothetical protein	-
BC332_04258	Two-component response regulator ARR9	Response_reg
BC332_10553	hypothetical protein	KH_1
BC332_05903	Potassium transporter 10	K_trans
BC332_30541	Inositol-3-phosphate synthase	-
BC332_10937	hypothetical protein	-
novel.1803	-	-
BC332_05383	hypothetical protein	-
BC332_28001	hypothetical protein	-
BC332_25464	hypothetical protein	-
BC332_21779	hypothetical protein	-
BC332_06873	CBL-interacting serine/threonine-protein kinase 7	Pkinase
novel.2091	-	-
novel.2011	-	-
BC332_30714	Transcription factor TGA7	bZIP_1
BC332_05598	hypothetical protein	Kinesin
BC332_29128	Cytokinin riboside 5'-monophosphate phosphoribohydrolase LOG4	-
novel.11078	-	-
BC332_05111	WRKY transcription factor 6	WRKY
BC332_16936	hypothetical protein	-
BC332_26704	WAT1-related protein	DUF6
BC332_00449	Primary amine oxidase	rve
BC332_05405	Mitogen-activated protein kinase 7	Pkinase
BC332_26897	Zinc finger CCCH domain-containing protein 30	-
BC332_26394	F-box protein PP2-A15	-
BC332_14392	hypothetical protein	-
BC332_19010	hypothetical protein	Ribonuclease_3
BC332_29254	Glutaredoxin-C6	-
BC332_25893	ATP-dependent zinc metalloprotease FTSH 3%2C mitochondrial	AAA
BC332_29441	putative purine permease 9	-
BC332_10531	hypothetical protein	-
BC332_08812	hypothetical protein	G-patch
BC332_20061	Organic cation/carnitine transporter 4	Sugar_tr
BC332_04813	hypothetical protein	-
BC332_05671	hypothetical protein	-
BC332_15641	Molybdopterin synthase catalytic subunit	-
BC332_27666	putative WRKY transcription factor 3	WRKY
BC332_13118	hypothetical protein	p450
BC332_05323	Scarecrow-like protein 15	GRAS
BC332_25402	hypothetical protein	-
BC332_12093	Hexokinase-2%2C chloroplastic	-
BC332_20549	putative plastid-lipid-associated protein 3%2C chloroplastic	-
BC332_29949	hypothetical protein	ACPS
BC332_14391	hypothetical protein	-
BC332_31319	hypothetical protein	Exo70
BC332_14393	hypothetical protein	-
BC332_08115	Protein SELF-PRUNING	-
BC332_13151	Two-component response regulator ARR2	Response_reg
BC332_20183	NAC domain-containing protein	NAM
BC332_04513	hypothetical protein	-
BC332_31905	putative glycerol-3-phosphate transporter 4	MFS_1
BC332_21703	Calcium and calcium/calmodulin-dependent serine/threonine-protein kinase	-
BC332_02080	hypothetical protein	HMA
BC332_03774	Protein trichome birefringence-like 19	-
BC332_23298	Transcription factor-like protein DPA	E2F_TDP
BC332_09511	Auxin-responsive protein IAA17	-
BC332_04844	hypothetical protein	Abhydrolase_1
BC332_31573	Scarecrow-like protein 3	GRAS
BC332_09934	hypothetical protein	-
BC332_19572	3-hydroxybutyryl-CoA dehydrogenase	3HCDH_N
BC332_24320	hypothetical protein	Glyoxalase
BC332_22615	hypothetical protein	FMO-like
BC332_14794	40S ribosomal protein S4	Ribosomal_S4e
BC332_22250	hypothetical protein	-
BC332_07242	Bidirectional sugar transporter SWEET14	-
BC332_14450	hypothetical protein	-
BC332_27839	F-box/kelch-repeat protein SKIP11	Kelch_1
BC332_06191	hypothetical protein	-
BC332_28968	Serine/threonine-protein kinase AGC1-5	Pkinase
BC332_01131	CBL-interacting serine/threonine-protein kinase 12	Pkinase
BC332_31152	hypothetical protein	-
BC332_14728	hypothetical protein	Pkinase
BC332_01944	hypothetical protein	2OG-FeII_Oxy
BC332_00235	hypothetical protein	Pkinase_Tyr
BC332_29744	Beta-glucosidase 42	Glyco_hydro_1
BC332_12158	GDSL esterase/lipase EXL1	hATC
BC332_04930	Pectinesterase 2.2	-
BC332_18901	hypothetical protein	p450
novel.1329	-	-
BC332_21446	U-box domain-containing protein 33	Pkinase
BC332_20099	NAC domain-containing protein 72	NAM
BC332_28643	Pyruvate dehydrogenase E1 component subunit beta-1%2C mitochondrial	-
BC332_14453	hypothetical protein	-
novel.1514	-	-
BC332_09559	hypothetical protein	Lipase_3
BC332_08545	Methylecgonone reductase	Aldo_ket_red
novel.7654	-	-
BC332_20256	Plant intracellular Ras-group-related LRR protein 5	-
BC332_12000	hypothetical protein	-
BC332_06408	hypothetical protein	p450
novel.2000	-	-
BC332_09863	Pollen receptor-like kinase 1	Pkinase
BC332_00622	hypothetical protein	-
BC332_22172	Receptor-like protein kinase HAIKU2	Pkinase
BC332_32086	hypothetical protein	-
BC332_29743	Beta-glucosidase 42	Glyco_hydro_1
novel.7403	-	-
novel.4151	-	-
BC332_32406	ABC transporter G family member 11	ABC2_membrane
BC332_05824	hypothetical protein	Pkinase_Tyr
novel.5318	-	-
novel.4834	-	-
BC332_31948	HVA22-like protein i	TB2_DP1_HVA22
novel.8961	-	-
BC332_29798	Serine/threonine-protein kinase SAPK2	Pkinase
novel.12900	-	-
BC332_14373	Nucleolar protein 58	-
novel.4610	-	-
BC332_24383	Organic cation/carnitine transporter 2	Sugar_tr
BC332_03616	G-type lectin S-receptor-like serine/threonine-protein kinase	Pkinase_Tyr
BC332_29742	hypothetical protein	Glyco_hydro_1
novel.7159	-	-
BC332_03894	High affinity nitrate transporter 2.7	MFS_1
novel.12320	-	-
BC332_05810	PI-PLC X domain-containing protein	-
BC332_06585	hypothetical protein	-
BC332_30576	Neutral ceramidase	Ceramidase_alk
BC332_05585	Nodulation receptor kinase	Pkinase_Tyr
BC332_23345	Scarecrow-like protein 9	GRAS
BC332_01310	hypothetical protein	DUF125
novel.12187	-	-
novel.4021	-	-
BC332_00174	ABC transporter C family member 10	ABC_tran
BC332_08811	Galactinol--sucrose galactosyltransferase	-
BC332_26673	hypothetical protein	RNase_PH
BC332_06586	putative folate-biopterin transporter 9%2C chloroplastic	-
BC332_14701	hypothetical protein	NB-ARC
BC332_12407	hypothetical protein	-
novel.4027	-	-
BC332_18566	hypothetical protein	Pkinase
BC332_25723	hypothetical protein	p450
novel.7680	-	-
novel.11982	-	-
BC332_03720	hypothetical protein	-
BC332_27671	hypothetical protein	NB-ARC
BC332_18804	CRIB domain-containing protein RIC6	PBD
BC332_00197	hypothetical protein	F-box
BC332_24864	hypothetical protein	-
BC332_05228	hypothetical protein	Pkinase
novel.12338	-	-
novel.3283	-	-
BC332_02767	hypothetical protein	-
BC332_02353	ATP synthase subunit alpha%2C chloroplastic	ATP-synt_ab
BC332_25820	Protein TIC	-
BC332_11641	hypothetical protein	-
