# Supplementary material for: Establishment of in vitro regeneration system and molecular analysis of early development of somatic callus in Capsicum chinense and Capsicum baccatum
Source: Front Plant Sci. 2022 Nov 17;13:1025497. doi: 10.3389/fpls.2022.1025497 (PMC9714296; doi:10.3389/fpls.2022.1025497)
Supplement: Supplementary file 6 [file Table_6.xlsx]

## Sheet: lightcyan module
Supplementary Table S6. KEGG pathway assignments of lightcyan module.
ID	Term	GeneRatio	BgRatio	pvalue	padj	geneID	geneName	keggID	Count
cann00073	Cutin, suberine and wax biosynthesis	4/38	67/7952	0.000273908	0.00958679	gene-BC332_16338/novel.8130/gene-BC332_03076/gene-BC332_01292	BC332_16338/-/BC332_03076/BC332_01292	cann:107876102/cann:107843219/cann:107854358/cann:107854358	4
cann04075	Plant hormone signal transduction	7/38	362/7952	0.00142023	0.0248541	gene-BC332_22126/gene-BC332_22660/gene-BC332_22664/gene-BC332_22667/gene-BC332_07153/gene-BC332_27239/gene-BC332_22662	BC332_22126/BC332_22660/BC332_22664/BC332_22667/BC332_07153/BC332_27239/BC332_22662	cann:107839829/cann:107879560/cann:107880029/cann:107840505/cann:107840503/cann:107856726/cann:107880024	7
cann00500	Starch and sucrose metabolism	4/38	211/7952	0.0175663	0.20494	gene-BC332_22888/gene-BC332_07137/gene-BC332_30829/gene-BC332_08327	BC332_22888/BC332_07137/BC332_30829/BC332_08327	cann:107840474/cann:107864053/cann:107851575/cann:107863145	4
cann00966	Glucosinolate biosynthesis	1/38	13/7952	0.0604167	0.458868	gene-BC332_31043	BC332_31043	cann:107851037	1
cann00940	Phenylpropanoid biosynthesis	3/38	281/7952	0.149622	0.458868	gene-BC332_19146/gene-BC332_18821/gene-BC332_26988	BC332_19146/BC332_18821/BC332_26988	cann:107878262/cann:107863896/cann:107844023	3
cann00905	Brassinosteroid biosynthesis	1/38	35/7952	0.154659	0.458868	gene-BC332_19735	BC332_19735	cann:107877366	1
cann00760	Nicotinate and nicotinamide metabolism	1/38	36/7952	0.158716	0.458868	gene-BC332_26426	BC332_26426	cann:107845103	1
cann00290	Valine, leucine and isoleucine biosynthesis	1/38	37/7952	0.162755	0.458868	gene-BC332_31043	BC332_31043	cann:107851037	1
cann04146	Peroxisome	2/38	157/7952	0.172314	0.458868	gene-BC332_10598/novel.8130	BC332_10598/-	cann:107852487/cann:107843219	2
cann00563	Glycosylphosphatidylinositol (GPI)-anchor biosynthesis	1/38	40/7952	0.174757	0.458868	gene-BC332_03066	BC332_03066	cann:107844274	1
cann00600	Sphingolipid metabolism	1/38	40/7952	0.174757	0.458868	gene-BC332_10856	BC332_10856	cann:107868025	1
cann00513	Various types of N-glycan biosynthesis	1/38	44/7952	0.1905	0.458868	gene-BC332_19898	BC332_19898	cann:107878772	1
cann00480	Glutathione metabolism	2/38	169/7952	0.192988	0.458868	gene-BC332_31338/gene-BC332_19761	BC332_31338/BC332_19761	cann:107851197/cann:107878536	2
cann00062	Fatty acid elongation	1/38	45/7952	0.19439	0.458868	gene-BC332_06126	BC332_06126	cann:107860712	1
cann01040	Biosynthesis of unsaturated fatty acids	1/38	46/7952	0.198262	0.458868	gene-BC332_06126	BC332_06126	cann:107860712	1
cann00770	Pantothenate and CoA biosynthesis	1/38	49/7952	0.209768	0.458868	gene-BC332_31043	BC332_31043	cann:107851037	1
cann03060	Protein export	1/38	58/7952	0.243332	0.470787	gene-BC332_24999	BC332_24999	cann:107845403	1
cann02010	ABC transporters	1/38	66/7952	0.271997	0.470787	gene-BC332_06037	BC332_06037	cann:107860540	1
cann00945	Stilbenoid, diarylheptanoid and gingerol biosynthesis	1/38	67/7952	0.275505	0.470787	gene-BC332_26988	BC332_26988	cann:107844023	1
cann03440	Homologous recombination	1/38	67/7952	0.275505	0.470787	gene-BC332_28229	BC332_28229	cann:107847643	1
cann00906	Carotenoid biosynthesis	1/38	69/7952	0.282472	0.470787	gene-BC332_33640	BC332_33640	cann:107840293	1
cann00330	Arginine and proline metabolism	1/38	82/7952	0.326192	0.498579	gene-BC332_04457	BC332_04457	cann:107860213	1
cann00941	Flavonoid biosynthesis	1/38	84/7952	0.332683	0.498579	gene-BC332_26988	BC332_26988	cann:107844023	1
cann00240	Pyrimidine metabolism	1/38	90/7952	0.351795	0.498579	gene-BC332_26426	BC332_26426	cann:107845103	1
cann01210	2-Oxocarboxylic acid metabolism	1/38	93/7952	0.36115	0.498579	gene-BC332_31043	BC332_31043	cann:107851037	1
cann00280	Valine, leucine and isoleucine degradation	1/38	96/7952	0.370373	0.498579	gene-BC332_31043	BC332_31043	cann:107851037	1
cann04145	Phagosome	1/38	129/7952	0.463649	0.601026	gene-BC332_24999	BC332_24999	cann:107845403	1
cann01212	Fatty acid metabolism	1/38	143/7952	0.499022	0.612747	gene-BC332_06126	BC332_06126	cann:107860712	1
cann00040	Pentose and glucuronate interconversions	1/38	150/7952	0.515846	0.612747	gene-BC332_21972	BC332_21972	cann:107879807	1
cann00270	Cysteine and methionine metabolism	1/38	154/7952	0.525212	0.612747	gene-BC332_31043	BC332_31043	cann:107851037	1
cann04626	Plant-pathogen interaction	2/38	466/7952	0.661503	0.746859	gene-BC332_05682/novel.7321	BC332_05682/-	cann:107861398/cann:107854624	2
cann03013	RNA transport	1/38	255/7952	0.71104	0.7777	gene-BC332_17352	BC332_17352	cann:107875471	1
cann03040	Spliceosome	1/38	304/7952	0.773438	0.820313	gene-BC332_31446	BC332_31446	cann:107850262	1
cann01230	Biosynthesis of amino acids	1/38	332/7952	0.802981	0.826598	gene-BC332_31043	BC332_31043	cann:107851037	1
cann04141	Protein processing in endoplasmic reticulum	1/38	374/7952	0.840386	0.840386	gene-BC332_24999	BC332_24999	cann:107845403	1

## Sheet: lightyellow module
Supplementary Table S6. KEGG pathway assignments of lightyellow module.
ID	Term	GeneRatio	BgRatio	pvalue	padj	geneID	geneName	keggID	Count
cann00061	Fatty acid biosynthesis	2021-02-27	83/7952	0.0319146	0.452138	gene-BC332_00213/gene-BC332_15734	BC332_00213/BC332_15734	cann:107864098/cann:107873041	2
cann00052	Galactose metabolism	2021-02-27	93/7952	0.0393	0.452138	gene-BC332_24623/gene-BC332_26054	BC332_24623/BC332_26054	cann:107840969/cann:107843403	2
cann00300	Lysine biosynthesis	2021-01-27	17/7952	0.0562348	0.452138	novel.10309	-	cann:107852288	1
cann01212	Fatty acid metabolism	2021-02-27	143/7952	0.084164	0.452138	gene-BC332_00213/gene-BC332_15734	BC332_00213/BC332_15734	cann:107864098/cann:107873041	2
cann01230	Biosynthesis of amino acids	2021-03-27	332/7952	0.100909	0.452138	gene-BC332_24260/gene-BC332_25718/novel.10309	BC332_24260/BC332_25718/-	cann:107878229/cann:107845710/cann:107852288	3
cann00780	Biotin metabolism	2021-01-27	33/7952	0.106371	0.452138	gene-BC332_00213	BC332_00213	cann:107864098	1
cann00480	Glutathione metabolism	2021-02-27	169/7952	0.111602	0.452138	gene-BC332_15787/gene-BC332_06879	BC332_15787/BC332_06879	cann:107873001/cann:107864635	2
cann00520	Amino sugar and nucleotide sugar metabolism	2021-02-27	185/7952	0.129526	0.452138	gene-BC332_18466/gene-BC332_24623	BC332_18466/BC332_24623	cann:107877950/cann:107840969	2
cann00591	Linoleic acid metabolism	2021-01-27	43/7952	0.136393	0.452138	novel.7648	-	cann:107854882	1
cann01040	Biosynthesis of unsaturated fatty acids	2021-01-27	46/7952	0.145209	0.452138	gene-BC332_15734	BC332_15734	cann:107873041	1
cann00500	Starch and sucrose metabolism	2021-02-27	211/7952	0.159974	0.452138	gene-BC332_24623/gene-BC332_26054	BC332_24623/BC332_26054	cann:107840969/cann:107843403	2
cann01200	Carbon metabolism	2021-03-27	442/7952	0.187377	0.452138	gene-BC332_24260/gene-BC332_01774/gene-BC332_24623	BC332_24260/BC332_01774/BC332_24623	cann:107878229/cann:107842329/cann:107840969	3
cann00073	Cutin, suberine and wax biosynthesis	2021-01-27	67/7952	0.204536	0.452138	gene-BC332_23224	BC332_23224	cann:107841629	1
cann00909	Sesquiterpenoid and triterpenoid biosynthesis	2021-01-27	67/7952	0.204536	0.452138	gene-BC332_24311	BC332_24311	cann:107846955	1
cann00945	Stilbenoid, diarylheptanoid and gingerol biosynthesis	2021-01-27	67/7952	0.204536	0.452138	gene-BC332_08582	BC332_08582	cann:107866062	1
cann03013	RNA transport	2021-02-27	255/7952	0.214092	0.452138	novel.11442/gene-BC332_15363	-/BC332_15363	cann:107870500/cann:107873424	2
cann00410	beta-Alanine metabolism	2021-01-27	74/7952	0.223415	0.452138	gene-BC332_01774	BC332_01774	cann:107842329	1
cann00400	Phenylalanine, tyrosine and tryptophan biosynthesis	2021-01-27	78/7952	0.234009	0.452138	gene-BC332_25718	BC332_25718	cann:107845710	1
cann00640	Propanoate metabolism	2021-01-27	79/7952	0.236635	0.452138	gene-BC332_01774	BC332_01774	cann:107842329	1
cann00053	Ascorbate and aldarate metabolism	2021-01-27	82/7952	0.244463	0.452138	gene-BC332_15787	BC332_15787	cann:107873001	1
cann00051	Fructose and mannose metabolism	2021-01-27	91/7952	0.267486	0.452138	gene-BC332_24623	BC332_24623	cann:107840969	1
cann01210	2-Oxocarboxylic acid metabolism	2021-01-27	93/7952	0.272509	0.452138	gene-BC332_24260	BC332_24260	cann:107878229	1
cann00020	Citrate cycle (TCA cycle)	2021-01-27	94/7952	0.275009	0.452138	gene-BC332_24260	BC332_24260	cann:107878229	1
cann00280	Valine, leucine and isoleucine degradation	2021-01-27	96/7952	0.279983	0.452138	gene-BC332_01774	BC332_01774	cann:107842329	1
cann03020	RNA polymerase	2021-01-27	100/7952	0.289832	0.452138	gene-BC332_04779	BC332_04779	cann:107858033	1
cann03008	Ribosome biogenesis in eukaryotes	2021-01-27	130/7952	0.359676	0.508026	gene-BC332_15363	BC332_15363	cann:107873424	1
cann04141	Protein processing in endoplasmic reticulum	2021-02-27	374/7952	0.364893	0.508026	gene-BC332_33274/gene-BC332_28314	BC332_33274/BC332_28314	cann:107839924/cann:107854404	2
cann00630	Glyoxylate and dicarboxylate metabolism	2021-01-27	143/7952	0.387843	0.508026	gene-BC332_24260	BC332_24260	cann:107878229	1
cann00040	Pentose and glucuronate interconversions	2021-01-27	150/7952	0.402512	0.508026	novel.8542	-	cann:107878919	1
cann00230	Purine metabolism	2021-01-27	150/7952	0.402512	0.508026	gene-BC332_17493	BC332_17493	cann:107867410	1
cann03015	mRNA surveillance pathway	2021-01-27	156/7952	0.414815	0.508026	novel.11442	-	cann:107870500	1
cann04146	Peroxisome	2021-01-27	157/7952	0.416842	0.508026	gene-BC332_23224	BC332_23224	cann:107841629	1
cann00010	Glycolysis / Gluconeogenesis	2021-01-27	188/7952	0.476421	0.563043	gene-BC332_24623	BC332_24623	cann:107840969	1
cann04120	Ubiquitin mediated proteolysis	2021-01-27	222/7952	0.535022	0.613702	gene-BC332_14760	BC332_14760	cann:107873608	1
cann00940	Phenylpropanoid biosynthesis	2021-01-27	281/7952	0.622047	0.693138	gene-BC332_29797	BC332_29797	cann:107851630	1
cann03040	Spliceosome	2021-01-27	304/7952	0.651529	0.705823	novel.11442	-	cann:107870500	1
cann00190	Oxidative phosphorylation	2021-01-27	324/7952	0.675354	0.711859	gene-BC332_11050	BC332_11050	cann:19989017	1
cann04075	Plant hormone signal transduction	2021-01-27	362/7952	0.716372	0.735224	gene-BC332_20033	BC332_20033	cann:107844929	1
cann03010	Ribosome	2021-01-27	479/7952	0.813675	0.813675	gene-BC332_03607	BC332_03607	cann:107862843	1

## Sheet: midnightblue module
Supplementary Table S6. KEGG pathway assignments of midnightblue module.
ID	Term	GeneRatio	BgRatio	pvalue	padj	geneID	geneName	keggID	Count
cann04075	Plant hormone signal transduction	9/44	362/7952	0.000130714	0.0056207	gene-BC332_06882/gene-BC332_09592/gene-BC332_07295/gene-BC332_00682/gene-BC332_18609/gene-BC332_04258/gene-BC332_30714/gene-BC332_09511/gene-BC332_29798	BC332_06882/BC332_09592/BC332_07295/BC332_00682/BC332_18609/BC332_04258/BC332_30714/BC332_09511/BC332_29798	cann:107864636/cann:107861707/cann:107863934/cann:107868580/cann:107877960/cann:107859144/cann:107851448/cann:107861852/cann:107851769	9
cann00940	Phenylpropanoid biosynthesis	7/44	281/7952	0.000795933	0.0171126	gene-BC332_23133/gene-BC332_04465/gene-BC332_29078/gene-BC332_24759/gene-BC332_29744/gene-BC332_29743/gene-BC332_29742	BC332_23133/BC332_04465/BC332_29078/BC332_24759/BC332_29744/BC332_29743/BC332_29742	cann:107843551/cann:107860206/cann:107847568/cann:107840863/cann:107851487/cann:107851487/cann:107851487	7
cann00500	Starch and sucrose metabolism	5/44	211/7952	0.00587214	0.0530331	gene-BC332_23622/gene-BC332_12093/gene-BC332_29744/gene-BC332_29743/gene-BC332_29742	BC332_23622/BC332_12093/BC332_29744/BC332_29743/BC332_29742	cann:107842585/cann:107866897/cann:107851487/cann:107851487/cann:107851487	5
cann00460	Cyanoamino acid metabolism	3/44	67/7952	0.00591722	0.0530331	gene-BC332_29744/gene-BC332_29743/gene-BC332_29742	BC332_29744/BC332_29743/BC332_29742	cann:107851487/cann:107851487/cann:107851487	3
cann00360	Phenylalanine metabolism	3/44	68/7952	0.00616663	0.0530331	gene-BC332_28133/gene-BC332_00449/gene-BC332_19572	BC332_28133/BC332_00449/BC332_19572	cann:107847449/cann:107866377/cann:107878648	3
cann00950	Isoquinoline alkaloid biosynthesis	2/44	47/7952	0.0276334	0.198039	gene-BC332_28133/gene-BC332_00449	BC332_28133/BC332_00449	cann:107847449/cann:107866377	2
cann00960	Tropane, piperidine and pyridine alkaloid biosynthesis	2/44	56/7952	0.0381577	0.234397	gene-BC332_28133/gene-BC332_00449	BC332_28133/BC332_00449	cann:107847449/cann:107866377	2
cann00410	beta-Alanine metabolism	2/44	74/7952	0.0628972	0.338072	gene-BC332_28133/gene-BC332_00449	BC332_28133/BC332_00449	cann:107847449/cann:107866377	2
cann00350	Tyrosine metabolism	2/44	80/7952	0.072086	0.344411	gene-BC332_28133/gene-BC332_00449	BC332_28133/BC332_00449	cann:107847449/cann:107866377	2
cann00052	Galactose metabolism	2/44	93/7952	0.0933472	0.346744	gene-BC332_12093/gene-BC332_08811	BC332_12093/BC332_08811	cann:107866897/cann:107862569	2
cann04122	Sulfur relay system	1/44	18/7952	0.0951457	0.346744	gene-BC332_15641	BC332_15641	cann:107875723	1
cann00260	Glycine, serine and threonine metabolism	2/44	95/7952	0.0967657	0.346744	gene-BC332_28133/gene-BC332_00449	BC332_28133/BC332_00449	cann:107847449/cann:107866377	2
cann04016	MAPK signaling pathway - plant	4/44	329/7952	0.107348	0.355073	gene-BC332_09592/gene-BC332_00682/gene-BC332_05405/gene-BC332_29798	BC332_09592/BC332_00682/BC332_05405/BC332_29798	cann:107861707/cann:107868580/cann:107860003/cann:107851769	4
cann00670	One carbon pool by folate	1/44	28/7952	0.14412	0.413143	gene-BC332_01432	BC332_01432	cann:107874073	1
cann00740	Riboflavin metabolism	1/44	28/7952	0.14412	0.413143	gene-BC332_19260	BC332_19260	cann:107855039	1
cann00790	Folate biosynthesis	1/44	36/7952	0.181425	0.455411	gene-BC332_15641	BC332_15641	cann:107875723	1
cann00600	Sphingolipid metabolism	1/44	40/7952	0.199477	0.455411	gene-BC332_30576	BC332_30576	cann:107868370	1
cann00910	Nitrogen metabolism	1/44	40/7952	0.199477	0.455411	gene-BC332_03894	BC332_03894	cann:107858815	1
cann00040	Pentose and glucuronate interconversions	2/44	150/7952	0.201228	0.455411	gene-BC332_34902/gene-BC332_04930	BC332_34902/BC332_04930	cann:107859556/cann:107859556	2
cann00650	Butanoate metabolism	1/44	43/7952	0.21276	0.457434	gene-BC332_19572	BC332_19572	cann:107878648	1
cann01200	Carbon metabolism	4/44	442/7952	0.227046	0.464903	gene-BC332_01432/gene-BC332_12093/gene-BC332_19572/gene-BC332_28643	BC332_01432/BC332_12093/BC332_19572/BC332_28643	cann:107874073/cann:107866897/cann:107878648/cann:107847937	4
cann00770	Pantothenate and CoA biosynthesis	1/44	49/7952	0.238683	0.466517	gene-BC332_29949	BC332_29949	cann:107851610	1
cann04130	SNARE interactions in vesicular transport	1/44	52/7952	0.25133	0.469878	gene-BC332_19909	BC332_19909	cann:107878764	1
cann04136	Autophagy - other	1/44	56/7952	0.267874	0.47994	gene-BC332_05138	BC332_05138	cann:107859590	1
cann00010	Glycolysis / Gluconeogenesis	2/44	188/7952	0.279219	0.480256	gene-BC332_12093/gene-BC332_28643	BC332_12093/BC332_28643	cann:107866897/cann:107847937	2
cann00130	Ubiquinone and other terpenoid-quinone biosynthesis	1/44	67/7952	0.311548	0.496169	gene-BC332_29078	BC332_29078	cann:107847568	1
cann00945	Stilbenoid, diarylheptanoid and gingerol biosynthesis	1/44	67/7952	0.311548	0.496169	gene-BC332_24759	BC332_24759	cann:107840863	1
cann03420	Nucleotide excision repair	1/44	71/7952	0.326789	0.501855	novel.11778	-	cann:107850698	1
cann00908	Zeatin biosynthesis	1/44	77/7952	0.349035	0.517535	novel.4834	-	cann:107854634	1
cann00941	Flavonoid biosynthesis	1/44	84/7952	0.374082	0.536184	gene-BC332_24759	BC332_24759	cann:107840863	1
cann00051	Fructose and mannose metabolism	1/44	91/7952	0.398186	0.548567	gene-BC332_12093	BC332_12093	cann:107866897	1
cann00020	Citrate cycle (TCA cycle)	1/44	94/7952	0.408236	0.548567	gene-BC332_28643	BC332_28643	cann:107847937	1
cann00562	Inositol phosphate metabolism	1/44	105/7952	0.443703	0.578159	gene-BC332_30541	BC332_30541	cann:107850683	1
cann03008	Ribosome biogenesis in eukaryotes	1/44	130/7952	0.516761	0.645675	gene-BC332_14373	BC332_14373	cann:107864654	1
cann00620	Pyruvate metabolism	1/44	138/7952	0.538094	0.645675	gene-BC332_28643	BC332_28643	cann:107847937	1
cann00190	Oxidative phosphorylation	2/44	324/7952	0.540565	0.645675	gene-BC332_32548/gene-BC332_02353	BC332_32548/BC332_02353	cann:107862484/cann:13540189	2
cann04146	Peroxisome	1/44	157/7952	0.585137	0.680024	gene-BC332_13153	BC332_13153	cann:107870670	1
cann03018	RNA degradation	1/44	167/7952	0.607982	0.687979	gene-BC332_26673	BC332_26673	cann:107843834	1
cann00520	Amino sugar and nucleotide sugar metabolism	1/44	185/7952	0.646043	0.712304	gene-BC332_12093	BC332_12093	cann:107866897	1
cann04120	Ubiquitin mediated proteolysis	1/44	222/7952	0.713287	0.766783	novel.11778	-	cann:107850698	1
cann00195	Photosynthesis	1/44	290/7952	0.805853	0.845163	gene-BC332_02353	BC332_02353	cann:13540189	1
cann04626	Plant-pathogen interaction	1/44	466/7952	0.930369	0.93551	gene-BC332_21703	BC332_21703	cann:107839378	1
cann03010	Ribosome	1/44	479/7952	0.93551	0.93551	gene-BC332_14794	BC332_14794	cann:107873587	1
