# Supplementary material for: Establishment of in vitro regeneration system and molecular analysis of early development of somatic callus in Capsicum chinense and Capsicum baccatum
Source: Front Plant Sci. 2022 Nov 17;13:1025497. doi: 10.3389/fpls.2022.1025497 (PMC9714296; doi:10.3389/fpls.2022.1025497)
Supplement: Supplementary file 7 [file Table_7.xlsx]

## Sheet: lightcyan module
Supplementary Table S7. GO assignments of lightcyan module.
Category	GO ID	Description	GeneRatio	BgRatio	pvalue	padj	geneID	geneName	Count
BP	GO:0009719	response to endogenous stimulus	8/72	129/11222	1.58368e-06	3.58966e-05	gene-BC332_22126/gene-BC332_10516/gene-BC332_29567/gene-BC332_29560/gene-BC332_24725/gene-BC332_29581/gene-BC332_07153/gene-BC332_29575	BC332_22126/BC332_10516/BC332_29567/BC332_29560/BC332_24725/BC332_29581/BC332_07153/BC332_29575	8
BP	GO:0009725	response to hormone	8/72	129/11222	1.58368e-06	3.58966e-05	gene-BC332_22126/gene-BC332_10516/gene-BC332_29567/gene-BC332_29560/gene-BC332_24725/gene-BC332_29581/gene-BC332_07153/gene-BC332_29575	BC332_22126/BC332_10516/BC332_29567/BC332_29560/BC332_24725/BC332_29581/BC332_07153/BC332_29575	8
BP	GO:0010033	response to organic substance	8/72	129/11222	1.58368e-06	3.58966e-05	gene-BC332_22126/gene-BC332_10516/gene-BC332_29567/gene-BC332_29560/gene-BC332_24725/gene-BC332_29581/gene-BC332_07153/gene-BC332_29575	BC332_22126/BC332_10516/BC332_29567/BC332_29560/BC332_24725/BC332_29581/BC332_07153/BC332_29575	8
BP	GO:0009733	response to auxin	7/72	108/11222	5.53822e-06	9.41498e-05	gene-BC332_10516/gene-BC332_29567/gene-BC332_29560/gene-BC332_24725/gene-BC332_29581/gene-BC332_07153/gene-BC332_29575	BC332_10516/BC332_29567/BC332_29560/BC332_24725/BC332_29581/BC332_07153/BC332_29575	7
BP	GO:0042221	response to chemical	8/72	200/11222	3.98723e-05	0.000542263	gene-BC332_22126/gene-BC332_10516/gene-BC332_29567/gene-BC332_29560/gene-BC332_24725/gene-BC332_29581/gene-BC332_07153/gene-BC332_29575	BC332_22126/BC332_10516/BC332_29567/BC332_29560/BC332_24725/BC332_29581/BC332_07153/BC332_29575	8
BP	GO:0006633	fatty acid biosynthetic process	2/72	58/11222	0.0532964	0.529963	gene-BC332_03076/gene-BC332_01292	BC332_03076/BC332_01292	2
BP	GO:0006950	response to stress	6/72	461/11222	0.074867	0.529963	gene-BC332_23853/gene-BC332_19146/gene-BC332_05271/gene-BC332_15819/gene-BC332_18821/gene-BC332_20882	BC332_23853/BC332_19146/BC332_05271/BC332_15819/BC332_18821/BC332_20882	6
BP	GO:0006265	DNA topological change	1/72	13/11222	0.0803124	0.529963	gene-BC332_28229	BC332_28229	1
BP	GO:0008610	lipid biosynthetic process	3/72	162/11222	0.0857468	0.529963	gene-BC332_03076/gene-BC332_08422/gene-BC332_01292	BC332_03076/BC332_08422/BC332_01292	3
BP	GO:0006631	fatty acid metabolic process	2/72	80/11222	0.0932285	0.529963	gene-BC332_03076/gene-BC332_01292	BC332_03076/BC332_01292	2
BP	GO:0006952	defense response	2/72	80/11222	0.0932285	0.529963	gene-BC332_05271/gene-BC332_20882	BC332_05271/BC332_20882	2
BP	GO:0006996	organelle organization	3/72	181/11222	0.110196	0.529963	gene-BC332_10598/gene-BC332_28229/gene-BC332_26793	BC332_10598/BC332_28229/BC332_26793	3
BP	GO:0005992	trehalose biosynthetic process	1/72	23/11222	0.137731	0.529963	gene-BC332_08327	BC332_08327	1
BP	GO:0005991	trehalose metabolic process	1/72	25/11222	0.148784	0.529963	gene-BC332_08327	BC332_08327	1
BP	GO:0046351	disaccharide biosynthetic process	1/72	25/11222	0.148784	0.529963	gene-BC332_08327	BC332_08327	1
BP	GO:0000413	protein peptidyl-prolyl isomerization	1/72	26/11222	0.154257	0.529963	gene-BC332_22896	BC332_22896	1
BP	GO:0018208	peptidyl-proline modification	1/72	26/11222	0.154257	0.529963	gene-BC332_22896	BC332_22896	1
BP	GO:0044255	cellular lipid metabolic process	3/72	216/11222	0.16115	0.529963	gene-BC332_03076/gene-BC332_08422/gene-BC332_01292	BC332_03076/BC332_08422/BC332_01292	3
BP	GO:0007010	cytoskeleton organization	1/72	28/11222	0.1651	0.529963	gene-BC332_26793	BC332_26793	1
BP	GO:0072330	monocarboxylic acid biosynthetic process	2/72	114/11222	0.16599	0.529963	gene-BC332_03076/gene-BC332_01292	BC332_03076/BC332_01292	2
BP	GO:0009312	oligosaccharide biosynthetic process	1/72	29/11222	0.17047	0.529963	gene-BC332_08327	BC332_08327	1
BP	GO:0016043	cellular component organization	4/72	338/11222	0.171459	0.529963	gene-BC332_10598/gene-BC332_21972/gene-BC332_28229/gene-BC332_26793	BC332_10598/BC332_21972/BC332_28229/BC332_26793	4
BP	GO:0005984	disaccharide metabolic process	1/72	34/11222	0.196814	0.55764	gene-BC332_08327	BC332_08327	1
BP	GO:0045017	glycerolipid biosynthetic process	1/72	34/11222	0.196814	0.55764	gene-BC332_08422	BC332_08422	1
BP	GO:0009311	oligosaccharide metabolic process	1/72	38/11222	0.217294	0.561569	gene-BC332_08327	BC332_08327	1
BP	GO:0006979	response to oxidative stress	2/72	137/11222	0.219402	0.561569	gene-BC332_19146/gene-BC332_18821	BC332_19146/BC332_18821	2
BP	GO:0071840	cellular component organization or biogenesis	4/72	383/11222	0.230902	0.561569	gene-BC332_10598/gene-BC332_21972/gene-BC332_28229/gene-BC332_26793	BC332_10598/BC332_21972/BC332_28229/BC332_26793	4
BP	GO:0032787	monocarboxylic acid metabolic process	2/72	142/11222	0.231234	0.561569	gene-BC332_03076/gene-BC332_01292	BC332_03076/BC332_01292	2
BP	GO:0071103	DNA conformation change	1/72	43/11222	0.24217	0.567847	gene-BC332_28229	BC332_28229	1
BP	GO:0008033	tRNA processing	1/72	47/11222	0.261509	0.592753	gene-BC332_17352	BC332_17352	1
BP	GO:0018193	peptidyl-amino acid modification	1/72	54/11222	0.294187	0.633449	gene-BC332_22896	BC332_22896	1
BP	GO:0016053	organic acid biosynthetic process	2/72	174/11222	0.307409	0.633449	gene-BC332_03076/gene-BC332_01292	BC332_03076/BC332_01292	2
BP	GO:0046394	carboxylic acid biosynthetic process	2/72	174/11222	0.307409	0.633449	gene-BC332_03076/gene-BC332_01292	BC332_03076/BC332_01292	2
BP	GO:0046486	glycerolipid metabolic process	1/72	68/11222	0.355324	0.709973	gene-BC332_08422	BC332_08422	1
BP	GO:0042545	cell wall modification	1/72	72/11222	0.371812	0.709973	gene-BC332_21972	BC332_21972	1
BP	GO:0034470	ncRNA processing	1/72	73/11222	0.375868	0.709973	gene-BC332_17352	BC332_17352	1
BP	GO:0044283	small molecule biosynthetic process	2/72	211/11222	0.393655	0.723475	gene-BC332_03076/gene-BC332_01292	BC332_03076/BC332_01292	2
BP	GO:0034637	cellular carbohydrate biosynthetic process	1/72	82/11222	0.411233	0.735891	gene-BC332_08327	BC332_08327	1
BP	GO:0016051	carbohydrate biosynthetic process	1/72	90/11222	0.441005	0.745872	gene-BC332_08327	BC332_08327	1
BP	GO:0006629	lipid metabolic process	3/72	388/11222	0.456056	0.745872	gene-BC332_03076/gene-BC332_08422/gene-BC332_01292	BC332_03076/BC332_08422/BC332_01292	3
BP	GO:0045229	external encapsulating structure organization	1/72	96/11222	0.462355	0.745872	gene-BC332_21972	BC332_21972	1
BP	GO:0071555	cell wall organization	1/72	96/11222	0.462355	0.745872	gene-BC332_21972	BC332_21972	1
BP	GO:0006928	movement of cell or subcellular component	1/72	107/11222	0.499428	0.745872	gene-BC332_05446	BC332_05446	1
BP	GO:0007018	microtubule-based movement	1/72	107/11222	0.499428	0.745872	gene-BC332_05446	BC332_05446	1
BP	GO:0071554	cell wall organization or biogenesis	1/72	114/11222	0.521696	0.745872	gene-BC332_21972	BC332_21972	1
BP	GO:0006399	tRNA metabolic process	1/72	120/11222	0.540003	0.745872	gene-BC332_17352	BC332_17352	1
BP	GO:0051276	chromosome organization	1/72	122/11222	0.54595	0.745872	gene-BC332_28229	BC332_28229	1
BP	GO:0007017	microtubule-based process	1/72	123/11222	0.548895	0.745872	gene-BC332_05446	BC332_05446	1
BP	GO:0045454	cell redox homeostasis	1/72	125/11222	0.554729	0.745872	gene-BC332_02055	BC332_02055	1
BP	GO:0019725	cellular homeostasis	1/72	127/11222	0.560489	0.745872	gene-BC332_02055	BC332_02055	1
BP	GO:0044262	cellular carbohydrate metabolic process	1/72	128/11222	0.563341	0.745872	gene-BC332_08327	BC332_08327	1
BP	GO:0034660	ncRNA metabolic process	1/72	146/11222	0.611668	0.745872	gene-BC332_17352	BC332_17352	1
BP	GO:0006457	protein folding	1/72	148/11222	0.6167	0.745872	gene-BC332_22896	BC332_22896	1
BP	GO:0042592	homeostatic process	1/72	160/11222	0.645573	0.745872	gene-BC332_02055	BC332_02055	1
BP	GO:0019752	carboxylic acid metabolic process	2/72	348/11222	0.658927	0.745872	gene-BC332_03076/gene-BC332_01292	BC332_03076/BC332_01292	2
BP	GO:0043436	oxoacid metabolic process	2/72	352/11222	0.665118	0.745872	gene-BC332_03076/gene-BC332_01292	BC332_03076/BC332_01292	2
BP	GO:0015031	protein transport	1/72	169/11222	0.665809	0.745872	gene-BC332_24999	BC332_24999	1
BP	GO:0015833	peptide transport	1/72	169/11222	0.665809	0.745872	gene-BC332_24999	BC332_24999	1
BP	GO:0042886	amide transport	1/72	169/11222	0.665809	0.745872	gene-BC332_24999	BC332_24999	1
BP	GO:0006082	organic acid metabolic process	2/72	353/11222	0.666652	0.745872	gene-BC332_03076/gene-BC332_01292	BC332_03076/BC332_01292	2
BP	GO:0045184	establishment of protein localization	1/72	175/11222	0.678663	0.745872	gene-BC332_24999	BC332_24999	1
BP	GO:0006396	RNA processing	1/72	180/11222	0.689001	0.745872	gene-BC332_17352	BC332_17352	1
BP	GO:0008104	protein localization	1/72	181/11222	0.691029	0.745872	gene-BC332_24999	BC332_24999	1
BP	GO:0033036	macromolecule localization	1/72	191/11222	0.710604	0.751229	gene-BC332_24999	BC332_24999	1
BP	GO:0065008	regulation of biological quality	1/72	195/11222	0.718087	0.751229	gene-BC332_02055	BC332_02055	1
BP	GO:0071705	nitrogen compound transport	1/72	212/11222	0.747817	0.770479	gene-BC332_24999	BC332_24999	1
BP	GO:0071702	organic substance transport	1/72	233/11222	0.780304	0.79195	gene-BC332_24999	BC332_24999	1
BP	GO:0006259	DNA metabolic process	1/72	301/11222	0.859688	0.859688	gene-BC332_28229	BC332_28229	1
CC	GO:0000123	histone acetyltransferase complex	44218	11/3598	0.0653286	0.329703	gene-BC332_16542	BC332_16542	1
CC	GO:0031248	protein acetyltransferase complex	44218	11/3598	0.0653286	0.329703	gene-BC332_16542	BC332_16542	1
CC	GO:1902493	acetyltransferase complex	44218	11/3598	0.0653286	0.329703	gene-BC332_16542	BC332_16542	1
CC	GO:0005777	peroxisome	44218	14/3598	0.0824259	0.329703	gene-BC332_10598	BC332_10598	1
CC	GO:0042579	microbody	44218	14/3598	0.0824259	0.329703	gene-BC332_10598	BC332_10598	1
CC	GO:0005654	nucleoplasm	44218	57/3598	0.296969	0.612943	gene-BC332_16542	BC332_16542	1
CC	GO:0044451	nucleoplasm part	44218	57/3598	0.296969	0.612943	gene-BC332_16542	BC332_16542	1
CC	GO:1990234	transferase complex	44218	65/3598	0.331195	0.612943	gene-BC332_16542	BC332_16542	1
CC	GO:0031981	nuclear lumen	44218	76/3598	0.375667	0.612943	gene-BC332_16542	BC332_16542	1
CC	GO:0031974	membrane-enclosed lumen	44218	87/3598	0.417308	0.612943	gene-BC332_16542	BC332_16542	1
CC	GO:0043233	organelle lumen	44218	87/3598	0.417308	0.612943	gene-BC332_16542	BC332_16542	1
CC	GO:0070013	intracellular organelle lumen	44218	87/3598	0.417308	0.612943	gene-BC332_16542	BC332_16542	1
CC	GO:0005739	mitochondrion	44218	89/3598	0.424589	0.612943	gene-BC332_11408	BC332_11408	1
CC	GO:0005618	cell wall	44218	99/3598	0.459707	0.612943	gene-BC332_21972	BC332_21972	1
CC	GO:0030312	external encapsulating structure	44218	99/3598	0.459707	0.612943	gene-BC332_21972	BC332_21972	1
CC	GO:0044428	nuclear part	44218	110/3598	0.495973	0.619966	gene-BC332_16542	BC332_16542	1
CC	GO:0071944	cell periphery	44218	161/3598	0.63584	0.721793	gene-BC332_21972	BC332_21972	1
CC	GO:1902494	catalytic complex	44218	167/3598	0.649613	0.721793	gene-BC332_16542	BC332_16542	1
CC	GO:0044422	organelle part	44218	346/3598	0.892604	0.892604	gene-BC332_16542	BC332_16542	1
CC	GO:0044446	intracellular organelle part	44218	346/3598	0.892604	0.892604	gene-BC332_16542	BC332_16542	1
MF	GO:0003700	DNA binding transcription factor activity	7/90	471/17698	0.010141	0.374552	gene-BC332_11502/gene-BC332_11631/gene-BC332_05766/gene-BC332_03008/gene-BC332_22835/gene-BC332_09540/gene-BC332_25633	BC332_11502/BC332_11631/BC332_05766/BC332_03008/BC332_22835/BC332_09540/BC332_25633	7
MF	GO:0004553	hydrolase activity, hydrolyzing O-glycosyl compounds	6/90	378/17698	0.0126352	0.374552	gene-BC332_22888/gene-BC332_07137/gene-BC332_30829/gene-BC332_24661/gene-BC332_00031/gene-BC332_07084	BC332_22888/BC332_07137/BC332_30829/BC332_24661/BC332_00031/BC332_07084	6
MF	GO:0016798	hydrolase activity, acting on glycosyl bonds	6/90	400/17698	0.0162849	0.374552	gene-BC332_22888/gene-BC332_07137/gene-BC332_30829/gene-BC332_24661/gene-BC332_00031/gene-BC332_07084	BC332_22888/BC332_07137/BC332_30829/BC332_24661/BC332_00031/BC332_07084	6
MF	GO:0043565	sequence-specific DNA binding	4/90	244/17698	0.035887	0.535734	gene-BC332_11502/gene-BC332_05766/gene-BC332_03008/gene-BC332_22835	BC332_11502/BC332_05766/BC332_03008/BC332_22835	4
MF	GO:0016747	transferase activity, transferring acyl groups other than amino-acyl groups	4/90	277/17698	0.0528121	0.535734	gene-BC332_16717/gene-BC332_16718/gene-BC332_06943/gene-BC332_08422	BC332_16717/BC332_16718/BC332_06943/BC332_08422	4
MF	GO:0003916	DNA topoisomerase activity	1/90	13/17698	0.0641503	0.535734	gene-BC332_28229	BC332_28229	1
MF	GO:0004144	diacylglycerol O-acyltransferase activity	1/90	17/17698	0.0830573	0.535734	gene-BC332_08422	BC332_08422	1
MF	GO:0016411	acylglycerol O-acyltransferase activity	1/90	17/17698	0.0830573	0.535734	gene-BC332_08422	BC332_08422	1
MF	GO:0052689	carboxylic ester hydrolase activity	2/90	96/17698	0.0858289	0.535734	gene-BC332_06010/gene-BC332_21972	BC332_06010/BC332_21972	2
MF	GO:0016746	transferase activity, transferring acyl groups	4/90	329/17698	0.0868707	0.535734	gene-BC332_16717/gene-BC332_16718/gene-BC332_06943/gene-BC332_08422	BC332_16717/BC332_16718/BC332_06943/BC332_08422	4
MF	GO:0009055	electron transfer activity	3/90	211/17698	0.0926368	0.535734	gene-BC332_21201/gene-BC332_02055/gene-BC332_33179	BC332_21201/BC332_02055/BC332_33179	3
MF	GO:0140097	catalytic activity, acting on DNA	2/90	101/17698	0.0935448	0.535734	gene-BC332_10445/gene-BC332_28229	BC332_10445/BC332_28229	2
MF	GO:0008194	UDP-glycosyltransferase activity	2/90	110/17698	0.10791	0.535734	gene-BC332_30093/gene-BC332_29629	BC332_30093/BC332_29629	2
MF	GO:0010181	FMN binding	1/90	23/17698	0.110712	0.535734	gene-BC332_15545	BC332_15545	1
MF	GO:0003755	peptidyl-prolyl cis-trans isomerase activity	1/90	26/17698	0.124228	0.535734	gene-BC332_22896	BC332_22896	1
MF	GO:0016859	cis-trans isomerase activity	1/90	26/17698	0.124228	0.535734	gene-BC332_22896	BC332_22896	1
MF	GO:0016853	isomerase activity	2/90	128/17698	0.138194	0.547113	gene-BC332_22896/gene-BC332_28229	BC332_22896/BC332_28229	2
MF	GO:0003779	actin binding	1/90	32/17698	0.150654	0.547113	gene-BC332_26793	BC332_26793	1
MF	GO:0008374	O-acyltransferase activity	1/90	32/17698	0.150654	0.547113	gene-BC332_08422	BC332_08422	1
MF	GO:0004601	peroxidase activity	2/90	148/17698	0.173685	0.557145	gene-BC332_19146/gene-BC332_18821	BC332_19146/BC332_18821	2
MF	GO:0008092	cytoskeletal protein binding	2/90	149/17698	0.175498	0.557145	gene-BC332_05446/gene-BC332_26793	BC332_05446/BC332_26793	2
MF	GO:0016684	oxidoreductase activity, acting on peroxide as acceptor	2/90	151/17698	0.179134	0.557145	gene-BC332_19146/gene-BC332_18821	BC332_19146/BC332_18821	2
MF	GO:0016757	transferase activity, transferring glycosyl groups	4/90	441/17698	0.18676	0.557145	gene-BC332_30093/gene-BC332_29629/gene-BC332_19898/novel.11312	BC332_30093/BC332_29629/BC332_19898/-	4
MF	GO:0016209	antioxidant activity	2/90	159/17698	0.19379	0.557145	gene-BC332_19146/gene-BC332_18821	BC332_19146/BC332_18821	2
MF	GO:0008375	acetylglucosaminyltransferase activity	1/90	46/17698	0.209288	0.564981	gene-BC332_30093	BC332_30093	1
MF	GO:0003678	DNA helicase activity	1/90	51/17698	0.229243	0.564981	gene-BC332_10445	BC332_10445	1
MF	GO:0003690	double-stranded DNA binding	1/90	52/17698	0.233174	0.564981	gene-BC332_11408	BC332_11408	1
MF	GO:0008080	N-acetyltransferase activity	1/90	57/17698	0.252533	0.564981	gene-BC332_06943	BC332_06943	1
MF	GO:0015035	protein disulfide oxidoreductase activity	1/90	58/17698	0.256346	0.564981	gene-BC332_02055	BC332_02055	1
MF	GO:0016410	N-acyltransferase activity	1/90	59/17698	0.26014	0.564981	gene-BC332_06943	BC332_06943	1
MF	GO:0016758	transferase activity, transferring hexosyl groups	3/90	351/17698	0.264601	0.564981	gene-BC332_30093/gene-BC332_29629/novel.11312	BC332_30093/BC332_29629/-	3
MF	GO:0016407	acetyltransferase activity	1/90	61/17698	0.267671	0.564981	gene-BC332_06943	BC332_06943	1
MF	GO:0004185	serine-type carboxypeptidase activity	1/90	66/17698	0.286169	0.564981	gene-BC332_29446	BC332_29446	1
MF	GO:0004180	carboxypeptidase activity	1/90	68/17698	0.293438	0.564981	gene-BC332_29446	BC332_29446	1
MF	GO:0015036	disulfide oxidoreductase activity	1/90	71/17698	0.304204	0.564981	gene-BC332_02055	BC332_02055	1
MF	GO:0030599	pectinesterase activity	1/90	72/17698	0.307756	0.564981	gene-BC332_21972	BC332_21972	1
MF	GO:0070008	serine-type exopeptidase activity	1/90	74/17698	0.314808	0.564981	gene-BC332_29446	BC332_29446	1
MF	GO:0004386	helicase activity	1/90	78/17698	0.328698	0.564981	gene-BC332_10445	BC332_10445	1
MF	GO:0008238	exopeptidase activity	1/90	82/17698	0.34231	0.564981	gene-BC332_29446	BC332_29446	1
MF	GO:0010333	terpene synthase activity	1/90	82/17698	0.34231	0.564981	gene-BC332_32975	BC332_32975	1
MF	GO:0016838	carbon-oxygen lyase activity, acting on phosphates	1/90	85/17698	0.35234	0.564981	gene-BC332_32975	BC332_32975	1
MF	GO:0016887	ATPase activity	2/90	246/17698	0.356562	0.564981	gene-BC332_06037/gene-BC332_21330	BC332_06037/BC332_21330	2
MF	GO:0042626	ATPase activity, coupled to transmembrane movement of substances	1/90	90/17698	0.368721	0.564981	gene-BC332_06037	BC332_06037	1
MF	GO:0043492	ATPase activity, coupled to movement of substances	1/90	90/17698	0.368721	0.564981	gene-BC332_06037	BC332_06037	1
MF	GO:0016667	oxidoreductase activity, acting on a sulfur group of donors	1/90	91/17698	0.371948	0.564981	gene-BC332_02055	BC332_02055	1
MF	GO:0015399	primary active transmembrane transporter activity	1/90	102/17698	0.406382	0.564981	gene-BC332_06037	BC332_06037	1
MF	GO:0015405	P-P-bond-hydrolysis-driven transmembrane transporter activity	1/90	102/17698	0.406382	0.564981	gene-BC332_06037	BC332_06037	1
MF	GO:0030170	pyridoxal phosphate binding	1/90	103/17698	0.409418	0.564981	gene-BC332_10856	BC332_10856	1
MF	GO:0070279	vitamin B6 binding	1/90	103/17698	0.409418	0.564981	gene-BC332_10856	BC332_10856	1
MF	GO:0003777	microtubule motor activity	1/90	107/17698	0.42141	0.564981	gene-BC332_05446	BC332_05446	1
MF	GO:0140101	catalytic activity, acting on a tRNA	1/90	109/17698	0.427316	0.564981	gene-BC332_06010	BC332_06010	1
MF	GO:0042623	ATPase activity, coupled	1/90	114/17698	0.44182	0.564981	gene-BC332_06037	BC332_06037	1
MF	GO:0008017	microtubule binding	1/90	115/17698	0.444677	0.564981	gene-BC332_05446	BC332_05446	1
MF	GO:0015631	tubulin binding	1/90	117/17698	0.450347	0.564981	gene-BC332_05446	BC332_05446	1
MF	GO:0019842	vitamin binding	1/90	117/17698	0.450347	0.564981	gene-BC332_10856	BC332_10856	1
MF	GO:0003774	motor activity	1/90	135/17698	0.498873	0.607007	gene-BC332_05446	BC332_05446	1
MF	GO:0016835	carbon-oxygen lyase activity	1/90	136/17698	0.501441	0.607007	gene-BC332_32975	BC332_32975	1
MF	GO:0030246	carbohydrate binding	1/90	143/17698	0.519056	0.617498	gene-BC332_30829	BC332_30829	1
MF	GO:0004857	enzyme inhibitor activity	1/90	157/17698	0.55246	0.640597	gene-BC332_21972	BC332_21972	1
MF	GO:0000287	magnesium ion binding	1/90	159/17698	0.557041	0.640597	gene-BC332_32975	BC332_32975	1
MF	GO:0030234	enzyme regulator activity	1/90	203/17698	0.646871	0.719612	gene-BC332_21972	BC332_21972	1
MF	GO:0005509	calcium ion binding	1/90	205/17698	0.650495	0.719612	gene-BC332_05682	BC332_05682	1
MF	GO:0022804	active transmembrane transporter activity	1/90	210/17698	0.659394	0.719612	gene-BC332_06037	BC332_06037	1
MF	GO:0050662	coenzyme binding	2/90	447/17698	0.667466	0.719612	gene-BC332_10856/gene-BC332_15545	BC332_10856/BC332_15545	2
MF	GO:0098772	molecular function regulator	1/90	228/17698	0.689617	0.732055	gene-BC332_21972	BC332_21972	1
MF	GO:0008236	serine-type peptidase activity	1/90	248/17698	0.720095	0.741591	gene-BC332_29446	BC332_29446	1
MF	GO:0017171	serine hydrolase activity	1/90	248/17698	0.720095	0.741591	gene-BC332_29446	BC332_29446	1
MF	GO:0016829	lyase activity	1/90	256/17698	0.73144	0.742197	gene-BC332_32975	BC332_32975	1
MF	GO:0140098	catalytic activity, acting on RNA	1/90	410/17698	0.879354	0.879354	gene-BC332_06010	BC332_06010	1

## Sheet: lightyellow module
Supplementary Table S7. GO assignments of lightyellow module.
Category	GO ID	Description	GeneRatio	BgRatio	pvalue	padj	geneID	geneName	Count
BP	GO:0008037	cell recognition	2/32	75/11222	0.0192059	0.166413	gene-BC332_01599/gene-BC332_13062	BC332_01599/BC332_13062	2
BP	GO:0009856	pollination	2/32	75/11222	0.0192059	0.166413	gene-BC332_01599/gene-BC332_13062	BC332_01599/BC332_13062	2
BP	GO:0009875	pollen-pistil interaction	2/32	75/11222	0.0192059	0.166413	gene-BC332_01599/gene-BC332_13062	BC332_01599/BC332_13062	2
BP	GO:0044706	multi-multicellular organism process	2/32	75/11222	0.0192059	0.166413	gene-BC332_01599/gene-BC332_13062	BC332_01599/BC332_13062	2
BP	GO:0048544	recognition of pollen	2/32	75/11222	0.0192059	0.166413	gene-BC332_01599/gene-BC332_13062	BC332_01599/BC332_13062	2
BP	GO:0000003	reproduction	2/32	79/11222	0.021174	0.166413	gene-BC332_01599/gene-BC332_13062	BC332_01599/BC332_13062	2
BP	GO:0022414	reproductive process	2/32	79/11222	0.021174	0.166413	gene-BC332_01599/gene-BC332_13062	BC332_01599/BC332_13062	2
BP	GO:0051704	multi-organism process	2/32	81/11222	0.0221884	0.166413	gene-BC332_01599/gene-BC332_13062	BC332_01599/BC332_13062	2
BP	GO:0032501	multicellular organismal process	2/32	104/11222	0.0352258	0.234839	gene-BC332_01599/gene-BC332_13062	BC332_01599/BC332_13062	2
BP	GO:0009116	nucleoside metabolic process	1/32	29/11222	0.079572	0.367187	gene-BC332_17493	BC332_17493	1
BP	GO:1901657	glycosyl compound metabolic process	1/32	29/11222	0.079572	0.367187	gene-BC332_17493	BC332_17493	1
BP	GO:0007154	cell communication	3/32	370/11222	0.0873219	0.367187	gene-BC332_13559/gene-BC332_01599/gene-BC332_13062	BC332_13559/BC332_01599/BC332_13062	3
BP	GO:0006396	RNA processing	2/32	180/11222	0.0928105	0.367187	gene-BC332_15363/gene-BC332_00707	BC332_15363/BC332_00707	2
BP	GO:0009607	response to biotic stimulus	1/32	45/11222	0.120811	0.367187	gene-BC332_32185	BC332_32185	1
BP	GO:0008033	tRNA processing	1/32	47/11222	0.125839	0.367187	gene-BC332_15363	BC332_15363	1
BP	GO:0006397	mRNA processing	1/32	48/11222	0.128342	0.367187	gene-BC332_00707	BC332_00707	1
BP	GO:0006486	protein glycosylation	1/32	50/11222	0.133327	0.367187	gene-BC332_33274	BC332_33274	1
BP	GO:0043413	macromolecule glycosylation	1/32	50/11222	0.133327	0.367187	gene-BC332_33274	BC332_33274	1
BP	GO:0009100	glycoprotein metabolic process	1/32	54/11222	0.143216	0.367187	gene-BC332_33274	BC332_33274	1
BP	GO:0009101	glycoprotein biosynthetic process	1/32	54/11222	0.143216	0.367187	gene-BC332_33274	BC332_33274	1
BP	GO:0016071	mRNA metabolic process	1/32	56/11222	0.148119	0.367187	gene-BC332_00707	BC332_00707	1
BP	GO:0070085	glycosylation	1/32	56/11222	0.148119	0.367187	gene-BC332_33274	BC332_33274	1
BP	GO:0006855	drug transmembrane transport	1/32	58/11222	0.152995	0.367187	novel.7587	-	1
BP	GO:0015893	drug transport	1/32	58/11222	0.152995	0.367187	novel.7587	-	1
BP	GO:0042493	response to drug	1/32	58/11222	0.152995	0.367187	novel.7587	-	1
BP	GO:0042545	cell wall modification	1/32	72/11222	0.186377	0.410389	novel.8542	-	1
BP	GO:0034470	ncRNA processing	1/32	73/11222	0.188712	0.410389	gene-BC332_15363	BC332_15363	1
BP	GO:0006631	fatty acid metabolic process	1/32	80/11222	0.204877	0.410389	gene-BC332_15734	BC332_15734	1
BP	GO:0006952	defense response	1/32	80/11222	0.204877	0.410389	gene-BC332_32185	BC332_32185	1
BP	GO:1901135	carbohydrate derivative metabolic process	2/32	295/11222	0.205194	0.410389	gene-BC332_17493/gene-BC332_33274	BC332_17493/BC332_33274	2
BP	GO:0006812	cation transport	2/32	317/11222	0.228358	0.437566	gene-BC332_30367/gene-BC332_29160	BC332_30367/BC332_29160	2
BP	GO:0045229	external encapsulating structure organization	1/32	96/11222	0.240662	0.437566	novel.8542	-	1
BP	GO:0071555	cell wall organization	1/32	96/11222	0.240662	0.437566	novel.8542	-	1
BP	GO:0071554	cell wall organization or biogenesis	1/32	114/11222	0.279055	0.49245	novel.8542	-	1
BP	GO:0006399	tRNA metabolic process	1/32	120/11222	0.29143	0.499594	gene-BC332_15363	BC332_15363	1
BP	GO:0006979	response to oxidative stress	1/32	137/11222	0.325385	0.541132	gene-BC332_29797	BC332_29797	1
BP	GO:0032787	monocarboxylic acid metabolic process	1/32	142/11222	0.335068	0.541132	gene-BC332_15734	BC332_15734	1
BP	GO:0034660	ncRNA metabolic process	1/32	146/11222	0.342717	0.541132	gene-BC332_15363	BC332_15363	1
BP	GO:0035556	intracellular signal transduction	1/32	154/11222	0.357761	0.54397	gene-BC332_13559	BC332_13559	1
BP	GO:0030001	metal ion transport	1/32	160/11222	0.368824	0.54397	gene-BC332_29160	BC332_29160	1
BP	GO:0006811	ion transport	2/32	454/11222	0.373533	0.54397	gene-BC332_30367/gene-BC332_29160	BC332_30367/BC332_29160	2
BP	GO:0006950	response to stress	2/32	461/11222	0.380779	0.54397	gene-BC332_32185/gene-BC332_29797	BC332_32185/BC332_29797	2
BP	GO:1901137	carbohydrate derivative biosynthetic process	1/32	193/11222	0.42645	0.595046	gene-BC332_33274	BC332_33274	1
BP	GO:0042221	response to chemical	1/32	200/11222	0.438001	0.597274	novel.7587	-	1
BP	GO:0044255	cellular lipid metabolic process	1/32	216/11222	0.463563	0.606682	gene-BC332_15734	BC332_15734	1
BP	GO:0055086	nucleobase-containing small molecule metabolic process	1/32	217/11222	0.465123	0.606682	gene-BC332_17493	BC332_17493	1
BP	GO:0007165	signal transduction	1/32	292/11222	0.570382	0.712977	gene-BC332_13559	BC332_13559	1
BP	GO:0023052	signaling	1/32	292/11222	0.570382	0.712977	gene-BC332_13559	BC332_13559	1
BP	GO:0016043	cellular component organization	1/32	338/11222	0.624692	0.739521	novel.8542	-	1
BP	GO:0019752	carboxylic acid metabolic process	1/32	348/11222	0.635586	0.739521	gene-BC332_15734	BC332_15734	1
BP	GO:0043436	oxoacid metabolic process	1/32	352/11222	0.639858	0.739521	gene-BC332_15734	BC332_15734	1
BP	GO:0006082	organic acid metabolic process	1/32	353/11222	0.640918	0.739521	gene-BC332_15734	BC332_15734	1
BP	GO:0071840	cellular component organization or biogenesis	1/32	383/11222	0.671355	0.75131	novel.8542	-	1
BP	GO:0006629	lipid metabolic process	1/32	388/11222	0.676179	0.75131	gene-BC332_15734	BC332_15734	1
BP	GO:0051716	cellular response to stimulus	1/32	414/11222	0.700177	0.763699	gene-BC332_13559	BC332_13559	1
BP	GO:0006412	translation	1/32	467/11222	0.743876	0.763699	gene-BC332_03607	BC332_03607	1
BP	GO:0043043	peptide biosynthetic process	1/32	470/11222	0.746156	0.763699	gene-BC332_03607	BC332_03607	1
BP	GO:0006518	peptide metabolic process	1/32	477/11222	0.751399	0.763699	gene-BC332_03607	BC332_03607	1
BP	GO:0043604	amide biosynthetic process	1/32	481/11222	0.754347	0.763699	gene-BC332_03607	BC332_03607	1
BP	GO:0043603	cellular amide metabolic process	1/32	494/11222	0.763699	0.763699	gene-BC332_03607	BC332_03607	1
CC	GO:0005840	ribosome	44205	334/3598	0.584323	0.717548	gene-BC332_03607	BC332_03607	1
CC	GO:1990904	ribonucleoprotein complex	44205	369/3598	0.622806	0.717548	gene-BC332_03607	BC332_03607	1
CC	GO:0043228	non-membrane-bounded organelle	44205	471/3598	0.717548	0.717548	gene-BC332_03607	BC332_03607	1
CC	GO:0043232	intracellular non-membrane-bounded organelle	44205	471/3598	0.717548	0.717548	gene-BC332_03607	BC332_03607	1
MF	GO:0016835	carbon-oxygen lyase activity	3/51	136/17698	0.00706262	0.249476	gene-BC332_25718/gene-BC332_01774/gene-BC332_24311	BC332_25718/BC332_01774/BC332_24311	3
MF	GO:0016836	hydro-lyase activity	2/51	45/17698	0.00744706	0.249476	gene-BC332_25718/gene-BC332_01774	BC332_25718/BC332_01774	2
MF	GO:0022804	active transmembrane transporter activity	3/51	210/17698	0.0225975	0.324551	gene-BC332_30367/gene-BC332_32346/novel.7587	BC332_30367/BC332_32346/-	3
MF	GO:0080019	fatty-acyl-CoA reductase (alcohol-forming) activity	1/51	11/17698	0.0312544	0.324551	gene-BC332_23224	BC332_23224	1
MF	GO:0009678	hydrogen-translocating pyrophosphatase activity	1/51	12/17698	0.0340478	0.324551	gene-BC332_32346	BC332_32346	1
MF	GO:0015297	antiporter activity	2/51	102/17698	0.0349245	0.324551	gene-BC332_30367/novel.7587	BC332_30367/-	2
MF	GO:0016829	lyase activity	3/51	256/17698	0.0374545	0.324551	gene-BC332_25718/gene-BC332_01774/gene-BC332_24311	BC332_25718/BC332_01774/BC332_24311	3
MF	GO:0015291	secondary active transmembrane transporter activity	2/51	108/17698	0.0387524	0.324551	gene-BC332_30367/novel.7587	BC332_30367/-	2
MF	GO:0004427	inorganic diphosphatase activity	1/51	19/17698	0.0533813	0.331177	gene-BC332_32346	BC332_32346	1
MF	GO:0008641	ubiquitin-like modifier activating enzyme activity	1/51	20/17698	0.0561121	0.331177	gene-BC332_14760	BC332_14760	1
MF	GO:0016877	ligase activity, forming carbon-sulfur bonds	1/51	20/17698	0.0561121	0.331177	gene-BC332_14760	BC332_14760	1
MF	GO:0030246	carbohydrate binding	2/51	143/17698	0.0639307	0.331177	gene-BC332_08334/gene-BC332_11663	BC332_08334/BC332_11663	2
MF	GO:0016717	oxidoreductase activity, acting on paired donors, with oxidation of a pair of donors resulting in the reduction of molecular oxygen to two molecules of water	1/51	23/17698	0.0642582	0.331177	gene-BC332_15734	BC332_15734	1
MF	GO:0016620	oxidoreductase activity, acting on the aldehyde or oxo group of donors, NAD or NADP as acceptor	1/51	29/17698	0.0803442	0.384504	gene-BC332_23224	BC332_23224	1
MF	GO:0015298	solute:cation antiporter activity	1/51	40/17698	0.109134	0.434872	gene-BC332_30367	BC332_30367	1
MF	GO:0015299	solute:proton antiporter activity	1/51	40/17698	0.109134	0.434872	gene-BC332_30367	BC332_30367	1
MF	GO:0001871	pattern binding	1/51	43/17698	0.116831	0.434872	gene-BC332_08334	BC332_08334	1
MF	GO:0030247	polysaccharide binding	1/51	43/17698	0.116831	0.434872	gene-BC332_08334	BC332_08334	1
MF	GO:0016903	oxidoreductase activity, acting on the aldehyde or oxo group of donors	1/51	49/17698	0.13203	0.465581	gene-BC332_23224	BC332_23224	1
MF	GO:0035251	UDP-glucosyltransferase activity	1/51	58/17698	0.15435	0.507968	gene-BC332_33274	BC332_33274	1
MF	GO:0015238	drug transmembrane transporter activity	1/51	62/17698	0.164088	0.507968	novel.7587	-	1
MF	GO:0030599	pectinesterase activity	1/51	72/17698	0.187955	0.507968	novel.8542	-	1
MF	GO:0016702	oxidoreductase activity, acting on single donors with incorporation of molecular oxygen, incorporation of two atoms of oxygen	1/51	76/17698	0.197313	0.507968	novel.7648	-	1
MF	GO:0051213	dioxygenase activity	1/51	77/17698	0.199636	0.507968	novel.7648	-	1
MF	GO:0010333	terpene synthase activity	1/51	82/17698	0.211153	0.507968	gene-BC332_24311	BC332_24311	1
MF	GO:0016838	carbon-oxygen lyase activity, acting on phosphates	1/51	85/17698	0.217985	0.507968	gene-BC332_24311	BC332_24311	1
MF	GO:0008171	O-methyltransferase activity	1/51	87/17698	0.222507	0.507968	gene-BC332_08582	BC332_08582	1
MF	GO:0016701	oxidoreductase activity, acting on single donors with incorporation of molecular oxygen	1/51	88/17698	0.224759	0.507968	novel.7648	-	1
MF	GO:0046527	glucosyltransferase activity	1/51	88/17698	0.224759	0.507968	gene-BC332_33274	BC332_33274	1
MF	GO:0052689	carboxylic ester hydrolase activity	1/51	96/17698	0.242543	0.507968	novel.8542	-	1
MF	GO:0015399	primary active transmembrane transporter activity	1/51	102/17698	0.255617	0.507968	gene-BC332_32346	BC332_32346	1
MF	GO:0015405	P-P-bond-hydrolysis-driven transmembrane transporter activity	1/51	102/17698	0.255617	0.507968	gene-BC332_32346	BC332_32346	1
MF	GO:0030170	pyridoxal phosphate binding	1/51	103/17698	0.257775	0.507968	novel.10309	-	1
MF	GO:0070279	vitamin B6 binding	1/51	103/17698	0.257775	0.507968	novel.10309	-	1
MF	GO:0008194	UDP-glycosyltransferase activity	1/51	110/17698	0.272707	0.51655	gene-BC332_33274	BC332_33274	1
MF	GO:0019842	vitamin binding	1/51	117/17698	0.287344	0.51655	novel.10309	-	1
MF	GO:0003899	DNA-directed 5'-3' RNA polymerase activity	1/51	118/17698	0.289411	0.51655	gene-BC332_04779	BC332_04779	1
MF	GO:0015078	proton transmembrane transporter activity	1/51	129/17698	0.311767	0.51655	gene-BC332_30367	BC332_30367	1
MF	GO:0034062	5'-3' RNA polymerase activity	1/51	130/17698	0.313765	0.51655	gene-BC332_04779	BC332_04779	1
MF	GO:0097747	RNA polymerase activity	1/51	130/17698	0.313765	0.51655	gene-BC332_04779	BC332_04779	1
MF	GO:0016874	ligase activity	1/51	136/17698	0.325633	0.51655	gene-BC332_14760	BC332_14760	1
MF	GO:0016616	oxidoreductase activity, acting on the CH-OH group of donors, NAD or NADP as acceptor	1/51	137/17698	0.327592	0.51655	gene-BC332_25718	BC332_25718	1
MF	GO:0140098	catalytic activity, acting on RNA	2/51	410/17698	0.331517	0.51655	gene-BC332_04779/gene-BC332_15363	BC332_04779/BC332_15363	2
MF	GO:0004601	peroxidase activity	1/51	148/17698	0.348769	0.51989	gene-BC332_29797	BC332_29797	1
MF	GO:0016684	oxidoreductase activity, acting on peroxide as acceptor	1/51	151/17698	0.35443	0.51989	gene-BC332_29797	BC332_29797	1
MF	GO:0000287	magnesium ion binding	1/51	159/17698	0.369292	0.51989	gene-BC332_24311	BC332_24311	1
MF	GO:0016209	antioxidant activity	1/51	159/17698	0.369292	0.51989	gene-BC332_29797	BC332_29797	1
MF	GO:0015077	monovalent inorganic cation transmembrane transporter activity	1/51	162/17698	0.374778	0.51989	gene-BC332_30367	BC332_30367	1
MF	GO:0004540	ribonuclease activity	1/51	165/17698	0.380218	0.51989	gene-BC332_15363	BC332_15363	1
MF	GO:0016779	nucleotidyltransferase activity	1/51	193/17698	0.4288	0.574591	gene-BC332_04779	BC332_04779	1
MF	GO:0005509	calcium ion binding	1/51	205/17698	0.448459	0.589152	gene-BC332_18004	BC332_18004	1
MF	GO:0022890	inorganic cation transmembrane transporter activity	1/51	213/17698	0.461195	0.594232	gene-BC332_30367	BC332_30367	1
MF	GO:0016614	oxidoreductase activity, acting on CH-OH group of donors	1/51	226/17698	0.481278	0.608408	gene-BC332_25718	BC332_25718	1
MF	GO:0008324	cation transmembrane transporter activity	1/51	235/17698	0.49475	0.611077	gene-BC332_30367	BC332_30367	1
MF	GO:0004518	nuclease activity	1/51	240/17698	0.502086	0.611077	gene-BC332_15363	BC332_15363	1
MF	GO:0016887	ATPase activity	1/51	246/17698	0.510751	0.611077	gene-BC332_09924	BC332_09924	1
MF	GO:0008168	methyltransferase activity	1/51	300/17698	0.58237	0.684541	gene-BC332_08582	BC332_08582	1
MF	GO:0016741	transferase activity, transferring one-carbon groups	1/51	313/17698	0.598014	0.688988	gene-BC332_08582	BC332_08582	1
MF	GO:0015318	inorganic molecular entity transmembrane transporter activity	1/51	327/17698	0.614218	0.688988	gene-BC332_30367	BC332_30367	1
MF	GO:0003735	structural constituent of ribosome	1/51	336/17698	0.624295	0.688988	gene-BC332_03607	BC332_03607	1
MF	GO:0016758	transferase activity, transferring hexosyl groups	1/51	351/17698	0.64052	0.688988	gene-BC332_33274	BC332_33274	1
MF	GO:0015075	ion transmembrane transporter activity	1/51	352/17698	0.641576	0.688988	gene-BC332_30367	BC332_30367	1
MF	GO:0005198	structural molecule activity	1/51	358/17698	0.647854	0.688988	gene-BC332_03607	BC332_03607	1
MF	GO:0004553	hydrolase activity, hydrolyzing O-glycosyl compounds	1/51	378/17698	0.66801	0.699323	gene-BC332_12391	BC332_12391	1
MF	GO:0016798	hydrolase activity, acting on glycosyl bonds	1/51	400/17698	0.688877	0.710073	gene-BC332_12391	BC332_12391	1
MF	GO:0016757	transferase activity, transferring glycosyl groups	1/51	441/17698	0.72439	0.729242	gene-BC332_33274	BC332_33274	1
MF	GO:0050662	coenzyme binding	1/51	447/17698	0.729242	0.729242	novel.10309	-	1

## Sheet: midnightblue module
Supplementary Table S7. GO assignments of midnightblue module.
Category	GO ID	Description	GeneRatio	BgRatio	pvalue	padj	geneID	geneName	Count
BP	GO:0071804	cellular potassium ion transport	2/87	33/11222	0.0268517	0.773755	novel.2012/gene-BC332_05903	-/BC332_05903	2
BP	GO:0071805	potassium ion transmembrane transport	2/87	33/11222	0.0268517	0.773755	novel.2012/gene-BC332_05903	-/BC332_05903	2
BP	GO:0006813	potassium ion transport	2/87	35/11222	0.0299597	0.773755	novel.2012/gene-BC332_05903	-/BC332_05903	2
BP	GO:0030001	metal ion transport	4/87	160/11222	0.0355983	0.773755	novel.2012/gene-BC332_11452/gene-BC332_05903/gene-BC332_02080	-/BC332_11452/BC332_05903/BC332_02080	4
BP	GO:0009308	amine metabolic process	2/87	39/11222	0.036578	0.773755	gene-BC332_28133/gene-BC332_00449	BC332_28133/BC332_00449	2
BP	GO:0000160	phosphorelay signal transduction system	2/87	49/11222	0.0552528	0.773755	gene-BC332_04258/gene-BC332_13151	BC332_04258/BC332_13151	2
BP	GO:0007154	cell communication	6/87	370/11222	0.0671976	0.773755	gene-BC332_04063/gene-BC332_04258/gene-BC332_06873/gene-BC332_13151/gene-BC332_01131/gene-BC332_03616	BC332_04063/BC332_04258/BC332_06873/BC332_13151/BC332_01131/BC332_03616	6
BP	GO:0016042	lipid catabolic process	1/87	10/11222	0.0749058	0.773755	gene-BC332_09559	BC332_09559	1
BP	GO:0007165	signal transduction	5/87	292/11222	0.0761892	0.773755	gene-BC332_04063/gene-BC332_04258/gene-BC332_06873/gene-BC332_13151/gene-BC332_01131	BC332_04063/BC332_04258/BC332_06873/BC332_13151/BC332_01131	5
BP	GO:0023052	signaling	5/87	292/11222	0.0761892	0.773755	gene-BC332_04063/gene-BC332_04258/gene-BC332_06873/gene-BC332_13151/gene-BC332_01131	BC332_04063/BC332_04258/BC332_06873/BC332_13151/BC332_01131	5
BP	GO:0045786	negative regulation of cell cycle	1/87	11/11222	0.0820841	0.773755	gene-BC332_06452	BC332_06452	1
BP	GO:0042398	cellular modified amino acid biosynthetic process	1/87	14/11222	0.10329	0.773755	gene-BC332_01432	BC332_01432	1
BP	GO:0042545	cell wall modification	2/87	72/11222	0.107318	0.773755	gene-BC332_34902/gene-BC332_04930	BC332_34902/BC332_04930	2
BP	GO:0048523	negative regulation of cellular process	1/87	16/11222	0.117158	0.773755	gene-BC332_06452	BC332_06452	1
BP	GO:0035556	intracellular signal transduction	3/87	154/11222	0.117292	0.773755	gene-BC332_04063/gene-BC332_04258/gene-BC332_13151	BC332_04063/BC332_04258/BC332_13151	3
BP	GO:0006066	alcohol metabolic process	1/87	18/11222	0.130814	0.773755	gene-BC332_30541	BC332_30541	1
BP	GO:0019751	polyol metabolic process	1/87	18/11222	0.130814	0.773755	gene-BC332_30541	BC332_30541	1
BP	GO:0006575	cellular modified amino acid metabolic process	1/87	19/11222	0.137563	0.773755	gene-BC332_01432	BC332_01432	1
BP	GO:0009108	coenzyme biosynthetic process	2/87	88/11222	0.148777	0.773755	gene-BC332_01432/gene-BC332_15641	BC332_01432/BC332_15641	2
BP	GO:0051726	regulation of cell cycle	1/87	21/11222	0.150906	0.773755	gene-BC332_06452	BC332_06452	1
BP	GO:0006479	protein methylation	1/87	22/11222	0.157502	0.773755	gene-BC332_14484	BC332_14484	1
BP	GO:0008213	protein alkylation	1/87	22/11222	0.157502	0.773755	gene-BC332_14484	BC332_14484	1
BP	GO:0022402	cell cycle process	1/87	23/11222	0.164046	0.773755	gene-BC332_06452	BC332_06452	1
BP	GO:1901615	organic hydroxy compound metabolic process	1/87	23/11222	0.164046	0.773755	gene-BC332_30541	BC332_30541	1
BP	GO:0045229	external encapsulating structure organization	2/87	96/11222	0.170564	0.773755	gene-BC332_34902/gene-BC332_04930	BC332_34902/BC332_04930	2
BP	GO:0071555	cell wall organization	2/87	96/11222	0.170564	0.773755	gene-BC332_34902/gene-BC332_04930	BC332_34902/BC332_04930	2
BP	GO:0051188	cofactor biosynthetic process	2/87	105/11222	0.195661	0.773755	gene-BC332_01432/gene-BC332_15641	BC332_01432/BC332_15641	2
BP	GO:0007010	cytoskeleton organization	1/87	28/11222	0.196022	0.773755	gene-BC332_03421	BC332_03421	1
BP	GO:0006732	coenzyme metabolic process	2/87	106/11222	0.19848	0.773755	gene-BC332_01432/gene-BC332_15641	BC332_01432/BC332_15641	2
BP	GO:0043414	macromolecule methylation	1/87	29/11222	0.20227	0.773755	gene-BC332_14484	BC332_14484	1
BP	GO:0051716	cellular response to stimulus	5/87	414/11222	0.217814	0.773755	gene-BC332_04063/gene-BC332_04258/gene-BC332_06873/gene-BC332_13151/gene-BC332_01131	BC332_04063/BC332_04258/BC332_06873/BC332_13151/BC332_01131	5
BP	GO:0071554	cell wall organization or biogenesis	2/87	114/11222	0.221192	0.773755	gene-BC332_34902/gene-BC332_04930	BC332_34902/BC332_04930	2
BP	GO:0006812	cation transport	4/87	317/11222	0.231244	0.773755	novel.2012/gene-BC332_11452/gene-BC332_05903/gene-BC332_02080	-/BC332_11452/BC332_05903/BC332_02080	4
BP	GO:0008654	phospholipid biosynthetic process	1/87	34/11222	0.2328	0.773755	gene-BC332_30541	BC332_30541	1
BP	GO:0032259	methylation	1/87	35/11222	0.238766	0.773755	gene-BC332_14484	BC332_14484	1
BP	GO:0048519	negative regulation of biological process	1/87	39/11222	0.262174	0.773755	gene-BC332_06452	BC332_06452	1
BP	GO:0007049	cell cycle	1/87	42/11222	0.279262	0.773755	gene-BC332_06452	BC332_06452	1
BP	GO:0015672	monovalent inorganic cation transport	2/87	135/11222	0.281528	0.773755	novel.2012/gene-BC332_05903	-/BC332_05903	2
BP	GO:0006887	exocytosis	1/87	43/11222	0.284871	0.773755	gene-BC332_31319	BC332_31319	1
BP	GO:0032940	secretion by cell	1/87	43/11222	0.284871	0.773755	gene-BC332_31319	BC332_31319	1
BP	GO:0046903	secretion	1/87	43/11222	0.284871	0.773755	gene-BC332_31319	BC332_31319	1
BP	GO:0006979	response to oxidative stress	2/87	137/11222	0.287282	0.773755	gene-BC332_23133/gene-BC332_04465	BC332_23133/BC332_04465	2
BP	GO:0098655	cation transmembrane transport	2/87	138/11222	0.290158	0.773755	novel.2012/gene-BC332_05903	-/BC332_05903	2
BP	GO:0098660	inorganic ion transmembrane transport	2/87	138/11222	0.290158	0.773755	novel.2012/gene-BC332_05903	-/BC332_05903	2
BP	GO:0098662	inorganic cation transmembrane transport	2/87	138/11222	0.290158	0.773755	novel.2012/gene-BC332_05903	-/BC332_05903	2
BP	GO:0051186	cofactor metabolic process	2/87	145/11222	0.310245	0.809335	gene-BC332_01432/gene-BC332_15641	BC332_01432/BC332_15641	2
BP	GO:0006629	lipid metabolic process	4/87	388/11222	0.354549	0.841144	gene-BC332_30541/gene-BC332_19572/gene-BC332_09559/gene-BC332_05810	BC332_30541/BC332_19572/BC332_09559/BC332_05810	4
BP	GO:0006855	drug transmembrane transport	1/87	58/11222	0.364002	0.841144	novel.4151	-	1
BP	GO:0015893	drug transport	1/87	58/11222	0.364002	0.841144	novel.4151	-	1
BP	GO:0042493	response to drug	1/87	58/11222	0.364002	0.841144	novel.4151	-	1
BP	GO:0034220	ion transmembrane transport	2/87	171/11222	0.383561	0.841144	novel.2012/gene-BC332_05903	-/BC332_05903	2
BP	GO:0016567	protein ubiquitination	1/87	62/11222	0.383599	0.841144	gene-BC332_21446	BC332_21446	1
BP	GO:0032446	protein modification by small protein conjugation	1/87	63/11222	0.388404	0.841144	gene-BC332_21446	BC332_21446	1
BP	GO:0019637	organophosphate metabolic process	3/87	289/11222	0.389183	0.841144	gene-BC332_30541/gene-BC332_15641/gene-BC332_02353	BC332_30541/BC332_15641/BC332_02353	3
BP	GO:0090407	organophosphate biosynthetic process	2/87	175/11222	0.394576	0.841144	gene-BC332_30541/gene-BC332_15641	BC332_30541/BC332_15641	2
BP	GO:0006644	phospholipid metabolic process	1/87	68/11222	0.411881	0.841144	gene-BC332_30541	BC332_30541	1
BP	GO:0008037	cell recognition	1/87	75/11222	0.443258	0.841144	gene-BC332_03616	BC332_03616	1
BP	GO:0009856	pollination	1/87	75/11222	0.443258	0.841144	gene-BC332_03616	BC332_03616	1
BP	GO:0009875	pollen-pistil interaction	1/87	75/11222	0.443258	0.841144	gene-BC332_03616	BC332_03616	1
BP	GO:0044706	multi-multicellular organism process	1/87	75/11222	0.443258	0.841144	gene-BC332_03616	BC332_03616	1
BP	GO:0048544	recognition of pollen	1/87	75/11222	0.443258	0.841144	gene-BC332_03616	BC332_03616	1
BP	GO:0000003	reproduction	1/87	79/11222	0.460439	0.841144	gene-BC332_03616	BC332_03616	1
BP	GO:0022414	reproductive process	1/87	79/11222	0.460439	0.841144	gene-BC332_03616	BC332_03616	1
BP	GO:0006631	fatty acid metabolic process	1/87	80/11222	0.464652	0.841144	gene-BC332_19572	BC332_19572	1
BP	GO:0051704	multi-organism process	1/87	81/11222	0.468832	0.841144	gene-BC332_03616	BC332_03616	1
BP	GO:0006811	ion transport	4/87	454/11222	0.470325	0.841144	novel.2012/gene-BC332_11452/gene-BC332_05903/gene-BC332_02080	-/BC332_11452/BC332_05903/BC332_02080	4
BP	GO:0034637	cellular carbohydrate biosynthetic process	1/87	82/11222	0.47298	0.841144	gene-BC332_30541	BC332_30541	1
BP	GO:0044283	small molecule biosynthetic process	2/87	211/11222	0.489253	0.841144	gene-BC332_01432/gene-BC332_30541	BC332_01432/BC332_30541	2
BP	GO:0016043	cellular component organization	3/87	338/11222	0.48963	0.841144	gene-BC332_03421/gene-BC332_34902/gene-BC332_04930	BC332_03421/BC332_34902/BC332_04930	3
BP	GO:0044255	cellular lipid metabolic process	2/87	216/11222	0.501681	0.841144	gene-BC332_30541/gene-BC332_19572	BC332_30541/BC332_19572	2
BP	GO:0016051	carbohydrate biosynthetic process	1/87	90/11222	0.50503	0.841144	gene-BC332_30541	BC332_30541	1
BP	GO:0007264	small GTPase mediated signal transduction	1/87	91/11222	0.508899	0.841144	gene-BC332_04063	BC332_04063	1
BP	GO:0015074	DNA integration	1/87	98/11222	0.535153	0.841144	gene-BC332_00449	BC332_00449	1
BP	GO:0032501	multicellular organismal process	1/87	104/11222	0.556549	0.841144	gene-BC332_03616	BC332_03616	1
BP	GO:0006928	movement of cell or subcellular component	1/87	107/11222	0.566879	0.841144	gene-BC332_05598	BC332_05598	1
BP	GO:0007018	microtubule-based movement	1/87	107/11222	0.566879	0.841144	gene-BC332_05598	BC332_05598	1
BP	GO:0071840	cellular component organization or biogenesis	3/87	383/11222	0.574538	0.841144	gene-BC332_03421/gene-BC332_34902/gene-BC332_04930	BC332_03421/BC332_34902/BC332_04930	3
BP	GO:0007017	microtubule-based process	1/87	123/11222	0.618083	0.841144	gene-BC332_05598	BC332_05598	1
BP	GO:0070647	protein modification by small protein conjugation or removal	1/87	124/11222	0.621076	0.841144	gene-BC332_21446	BC332_21446	1
BP	GO:0045454	cell redox homeostasis	1/87	125/11222	0.624047	0.841144	gene-BC332_22256	BC332_22256	1
BP	GO:0019725	cellular homeostasis	1/87	127/11222	0.629919	0.841144	gene-BC332_22256	BC332_22256	1
BP	GO:0044262	cellular carbohydrate metabolic process	1/87	128/11222	0.632821	0.841144	gene-BC332_30541	BC332_30541	1
BP	GO:0046034	ATP metabolic process	1/87	134/11222	0.649766	0.841144	gene-BC332_02353	BC332_02353	1
BP	GO:0009126	purine nucleoside monophosphate metabolic process	1/87	137/11222	0.657946	0.841144	gene-BC332_02353	BC332_02353	1
BP	GO:0009161	ribonucleoside monophosphate metabolic process	1/87	137/11222	0.657946	0.841144	gene-BC332_02353	BC332_02353	1
BP	GO:0009167	purine ribonucleoside monophosphate metabolic process	1/87	137/11222	0.657946	0.841144	gene-BC332_02353	BC332_02353	1
BP	GO:0009123	nucleoside monophosphate metabolic process	1/87	138/11222	0.660631	0.841144	gene-BC332_02353	BC332_02353	1
BP	GO:0032787	monocarboxylic acid metabolic process	1/87	142/11222	0.671163	0.841144	gene-BC332_19572	BC332_19572	1
BP	GO:0009144	purine nucleoside triphosphate metabolic process	1/87	144/11222	0.676307	0.841144	gene-BC332_02353	BC332_02353	1
BP	GO:0009199	ribonucleoside triphosphate metabolic process	1/87	144/11222	0.676307	0.841144	gene-BC332_02353	BC332_02353	1
BP	GO:0009205	purine ribonucleoside triphosphate metabolic process	1/87	144/11222	0.676307	0.841144	gene-BC332_02353	BC332_02353	1
BP	GO:0009141	nucleoside triphosphate metabolic process	1/87	147/11222	0.683874	0.841144	gene-BC332_02353	BC332_02353	1
BP	GO:0006950	response to stress	3/87	461/11222	0.699609	0.841144	gene-BC332_23133/gene-BC332_04465/gene-BC332_19159	BC332_23133/BC332_04465/BC332_19159	3
BP	GO:0042592	homeostatic process	1/87	160/11222	0.714695	0.841144	gene-BC332_22256	BC332_22256	1
BP	GO:0008610	lipid biosynthetic process	1/87	162/11222	0.719165	0.841144	gene-BC332_30541	BC332_30541	1
BP	GO:0009150	purine ribonucleotide metabolic process	1/87	164/11222	0.723566	0.841144	gene-BC332_02353	BC332_02353	1
BP	GO:0009259	ribonucleotide metabolic process	1/87	164/11222	0.723566	0.841144	gene-BC332_02353	BC332_02353	1
BP	GO:0006163	purine nucleotide metabolic process	1/87	169/11222	0.734272	0.841144	gene-BC332_02353	BC332_02353	1
BP	GO:0072521	purine-containing compound metabolic process	1/87	170/11222	0.736364	0.841144	gene-BC332_02353	BC332_02353	1
BP	GO:0019693	ribose phosphate metabolic process	1/87	171/11222	0.738439	0.841144	gene-BC332_02353	BC332_02353	1
BP	GO:0016053	organic acid biosynthetic process	1/87	174/11222	0.744569	0.841144	gene-BC332_01432	BC332_01432	1
BP	GO:0046394	carboxylic acid biosynthetic process	1/87	174/11222	0.744569	0.841144	gene-BC332_01432	BC332_01432	1
BP	GO:0016192	vesicle-mediated transport	1/87	175/11222	0.74658	0.841144	gene-BC332_31319	BC332_31319	1
BP	GO:0006396	RNA processing	1/87	180/11222	0.756405	0.841144	gene-BC332_19010	BC332_19010	1
BP	GO:0019752	carboxylic acid metabolic process	2/87	348/11222	0.756992	0.841144	gene-BC332_01432/gene-BC332_19572	BC332_01432/BC332_19572	2
BP	GO:0006996	organelle organization	1/87	181/11222	0.758324	0.841144	gene-BC332_03421	BC332_03421	1
BP	GO:0043436	oxoacid metabolic process	2/87	352/11222	0.762617	0.841144	gene-BC332_01432/gene-BC332_19572	BC332_01432/BC332_19572	2
BP	GO:0006082	organic acid metabolic process	2/87	353/11222	0.764006	0.841144	gene-BC332_01432/gene-BC332_19572	BC332_01432/BC332_19572	2
BP	GO:0009117	nucleotide metabolic process	1/87	195/11222	0.783676	0.841144	gene-BC332_02353	BC332_02353	1
BP	GO:0065008	regulation of biological quality	1/87	195/11222	0.783676	0.841144	gene-BC332_22256	BC332_22256	1
BP	GO:0017144	drug metabolic process	1/87	196/11222	0.785383	0.841144	gene-BC332_02353	BC332_02353	1
BP	GO:0006753	nucleoside phosphate metabolic process	1/87	198/11222	0.788756	0.841144	gene-BC332_02353	BC332_02353	1
BP	GO:0042221	response to chemical	1/87	200/11222	0.792077	0.841144	novel.4151	-	1
BP	GO:0055086	nucleobase-containing small molecule metabolic process	1/87	217/11222	0.818301	0.86137	gene-BC332_02353	BC332_02353	1
BP	GO:1901575	organic substance catabolic process	1/87	229/11222	0.834816	0.871113	gene-BC332_09559	BC332_09559	1
BP	GO:0009056	catabolic process	1/87	238/11222	0.84622	0.8754	gene-BC332_09559	BC332_09559	1
BP	GO:1901135	carbohydrate derivative metabolic process	1/87	295/11222	0.90238	0.922324	gene-BC332_02353	BC332_02353	1
BP	GO:0006259	DNA metabolic process	1/87	301/11222	0.906952	0.922324	gene-BC332_00449	BC332_00449	1
BP	GO:0043604	amide biosynthetic process	1/87	481/11222	0.97821	0.980397	gene-BC332_01432	BC332_01432	1
BP	GO:0043603	cellular amide metabolic process	1/87	494/11222	0.980397	0.980397	gene-BC332_01432	BC332_01432	1
CC	GO:0000123	histone acetyltransferase complex	44226	11/3598	0.0881054	0.452328	gene-BC332_22250	BC332_22250	1
CC	GO:0031248	protein acetyltransferase complex	44226	11/3598	0.0881054	0.452328	gene-BC332_22250	BC332_22250	1
CC	GO:1902493	acetyltransferase complex	44226	11/3598	0.0881054	0.452328	gene-BC332_22250	BC332_22250	1
CC	GO:0005667	transcription factor complex	44226	19/3598	0.147419	0.452328	gene-BC332_23298	BC332_23298	1
CC	GO:0071944	cell periphery	44285	161/3598	0.148428	0.452328	gene-BC332_34902/gene-BC332_31319/gene-BC332_04930	BC332_34902/BC332_31319/BC332_04930	3
CC	GO:0005618	cell wall	2/30	99/3598	0.19916	0.452328	gene-BC332_34902/gene-BC332_04930	BC332_34902/BC332_04930	2
CC	GO:0030312	external encapsulating structure	2/30	99/3598	0.19916	0.452328	gene-BC332_34902/gene-BC332_04930	BC332_34902/BC332_04930	2
CC	GO:0000145	exocyst	44226	29/3598	0.216331	0.452328	gene-BC332_31319	BC332_31319	1
CC	GO:0005938	cell cortex	44226	29/3598	0.216331	0.452328	gene-BC332_31319	BC332_31319	1
CC	GO:0044448	cell cortex part	44226	29/3598	0.216331	0.452328	gene-BC332_31319	BC332_31319	1
CC	GO:0099568	cytoplasmic region	44226	29/3598	0.216331	0.452328	gene-BC332_31319	BC332_31319	1
CC	GO:0099023	tethering complex	44226	37/3598	0.267554	0.512811	gene-BC332_31319	BC332_31319	1
CC	GO:0005654	nucleoplasm	44226	57/3598	0.381851	0.627327	gene-BC332_22250	BC332_22250	1
CC	GO:0044451	nucleoplasm part	44226	57/3598	0.381851	0.627327	gene-BC332_22250	BC332_22250	1
CC	GO:1990234	transferase complex	44226	65/3598	0.422565	0.631423	gene-BC332_22250	BC332_22250	1
CC	GO:0031981	nuclear lumen	44226	76/3598	0.474338	0.631423	gene-BC332_22250	BC332_22250	1
CC	GO:0031974	membrane-enclosed lumen	44226	87/3598	0.52161	0.631423	gene-BC332_22250	BC332_22250	1
CC	GO:0043233	organelle lumen	44226	87/3598	0.52161	0.631423	gene-BC332_22250	BC332_22250	1
CC	GO:0070013	intracellular organelle lumen	44226	87/3598	0.52161	0.631423	gene-BC332_22250	BC332_22250	1
CC	GO:0044428	nuclear part	44226	110/3598	0.607541	0.698672	gene-BC332_22250	BC332_22250	1
CC	GO:1902494	catalytic complex	44226	167/3598	0.7611	0.833585	gene-BC332_22250	BC332_22250	1
CC	GO:0044422	organelle part	44226	346/3598	0.95246	0.95246	gene-BC332_22250	BC332_22250	1
CC	GO:0044446	intracellular organelle part	44226	346/3598	0.95246	0.95246	gene-BC332_22250	BC332_22250	1
MF	GO:0008131	primary amine oxidase activity	2/120	12/17698	0.00287835	0.202582	gene-BC332_28133/gene-BC332_00449	BC332_28133/BC332_00449	2
MF	GO:0016641	oxidoreductase activity, acting on the CH-NH2 group of donors, oxygen as acceptor	2/120	14/17698	0.00393362	0.202582	gene-BC332_28133/gene-BC332_00449	BC332_28133/BC332_00449	2
MF	GO:0016638	oxidoreductase activity, acting on the CH-NH2 group of donors	2/120	20/17698	0.00799803	0.274599	gene-BC332_28133/gene-BC332_00449	BC332_28133/BC332_00449	2
MF	GO:0003779	actin binding	2/120	32/17698	0.0198051	0.360339	gene-BC332_03421/gene-BC332_11641	BC332_03421/BC332_11641	2
MF	GO:0015079	potassium ion transmembrane transporter activity	2/120	33/17698	0.0209906	0.360339	novel.2012/gene-BC332_05903	-/BC332_05903	2
MF	GO:0048038	quinone binding	2/120	33/17698	0.0209906	0.360339	gene-BC332_28133/gene-BC332_00449	BC332_28133/BC332_00449	2
MF	GO:0043565	sequence-specific DNA binding	5/120	244/17698	0.025373	0.373345	gene-BC332_08938/gene-BC332_02470/gene-BC332_30714/gene-BC332_05111/gene-BC332_27666	BC332_08938/BC332_02470/BC332_30714/BC332_05111/BC332_27666	5
MF	GO:0008080	N-acetyltransferase activity	2/120	57/17698	0.057152	0.520481	gene-BC332_08693/gene-BC332_21779	BC332_08693/BC332_21779	2
MF	GO:0016410	N-acyltransferase activity	2/120	59/17698	0.0607426	0.520481	gene-BC332_08693/gene-BC332_21779	BC332_08693/BC332_21779	2
MF	GO:0016407	acetyltransferase activity	2/120	61/17698	0.0644085	0.520481	gene-BC332_08693/gene-BC332_21779	BC332_08693/BC332_21779	2
MF	GO:0019207	kinase regulator activity	1/120	11/17698	0.0721266	0.520481	gene-BC332_06452	BC332_06452	1
MF	GO:0019887	protein kinase regulator activity	1/120	11/17698	0.0721266	0.520481	gene-BC332_06452	BC332_06452	1
MF	GO:0008092	cytoskeletal protein binding	3/120	149/17698	0.0807923	0.520481	gene-BC332_03421/gene-BC332_05598/gene-BC332_11641	BC332_03421/BC332_05598/BC332_11641	3
MF	GO:0003857	3-hydroxyacyl-CoA dehydrogenase activity	1/120	13/17698	0.0846748	0.520481	gene-BC332_19572	BC332_19572	1
MF	GO:0030599	pectinesterase activity	2/120	72/17698	0.0858022	0.520481	gene-BC332_34902/gene-BC332_04930	BC332_34902/BC332_04930	2
MF	GO:0005507	copper ion binding	2/120	76/17698	0.094046	0.520481	gene-BC332_28133/gene-BC332_00449	BC332_28133/BC332_00449	2
MF	GO:0003700	DNA binding transcription factor activity	6/120	471/17698	0.101194	0.520481	gene-BC332_08938/gene-BC332_02470/gene-BC332_30714/gene-BC332_05111/gene-BC332_27666/gene-BC332_23298	BC332_08938/BC332_02470/BC332_30714/BC332_05111/BC332_27666/BC332_23298	6
MF	GO:0004525	ribonuclease III activity	1/120	17/17698	0.109269	0.520481	gene-BC332_19010	BC332_19010	1
MF	GO:0008146	sulfotransferase activity	1/120	17/17698	0.109269	0.520481	novel.1803	-	1
MF	GO:0016782	transferase activity, transferring sulfur-containing groups	1/120	17/17698	0.109269	0.520481	novel.1803	-	1
MF	GO:0032296	double-stranded RNA-specific ribonuclease activity	1/120	17/17698	0.109269	0.520481	gene-BC332_19010	BC332_19010	1
MF	GO:0046873	metal ion transmembrane transporter activity	2/120	84/17698	0.111171	0.520481	novel.2012/gene-BC332_05903	-/BC332_05903	2
MF	GO:0004674	protein serine/threonine kinase activity	1/120	20/17698	0.127283	0.569387	gene-BC332_03616	BC332_03616	1
MF	GO:0008061	chitin binding	1/120	21/17698	0.133207	0.569387	gene-BC332_27570	BC332_27570	1
MF	GO:0052689	carboxylic ester hydrolase activity	2/120	96/17698	0.138201	0.569387	gene-BC332_34902/gene-BC332_04930	BC332_34902/BC332_04930	2
MF	GO:0004499	N,N-dimethylaniline monooxygenase activity	1/120	26/17698	0.162234	0.618894	gene-BC332_22615	BC332_22615	1
MF	GO:0008081	phosphoric diester hydrolase activity	1/120	26/17698	0.162234	0.618894	gene-BC332_05810	BC332_05810	1
MF	GO:0016709	oxidoreductase activity, acting on paired donors, with incorporation or reduction of molecular oxygen, NAD(P)H as one donor, and incorporation of one atom of oxygen	1/120	30/17698	0.184761	0.656219	gene-BC332_22615	BC332_22615	1
MF	GO:0016879	ligase activity, forming carbon-nitrogen bonds	1/120	30/17698	0.184761	0.656219	gene-BC332_01432	BC332_01432	1
MF	GO:0004497	monooxygenase activity	1/120	38/17698	0.228027	0.715536	gene-BC332_22615	BC332_22615	1
MF	GO:0050661	NADP binding	1/120	41/17698	0.243658	0.715536	gene-BC332_22615	BC332_22615	1
MF	GO:0004222	metalloendopeptidase activity	1/120	42/17698	0.248798	0.715536	gene-BC332_25893	BC332_25893	1
MF	GO:0004601	peroxidase activity	2/120	148/17698	0.265526	0.715536	gene-BC332_23133/gene-BC332_04465	BC332_23133/BC332_04465	2
MF	GO:0008375	acetylglucosaminyltransferase activity	1/120	46/17698	0.269015	0.715536	gene-BC332_19563	BC332_19563	1
MF	GO:0016684	oxidoreductase activity, acting on peroxide as acceptor	2/120	151/17698	0.273066	0.715536	gene-BC332_23133/gene-BC332_04465	BC332_23133/BC332_04465	2
MF	GO:0004857	enzyme inhibitor activity	2/120	157/17698	0.288135	0.715536	gene-BC332_26583/gene-BC332_06452	BC332_26583/BC332_06452	2
MF	GO:0008237	metallopeptidase activity	1/120	50/17698	0.288692	0.715536	gene-BC332_25893	BC332_25893	1
MF	GO:0016747	transferase activity, transferring acyl groups other than amino-acyl groups	3/120	277/17698	0.289998	0.715536	gene-BC332_08693/gene-BC332_24759/gene-BC332_21779	BC332_08693/BC332_24759/BC332_21779	3
MF	GO:0016209	antioxidant activity	2/120	159/17698	0.293153	0.715536	gene-BC332_23133/gene-BC332_04465	BC332_23133/BC332_04465	2
MF	GO:0015077	monovalent inorganic cation transmembrane transporter activity	2/120	162/17698	0.30067	0.715536	novel.2012/gene-BC332_05903	-/BC332_05903	2
MF	GO:0004866	endopeptidase inhibitor activity	1/120	60/17698	0.335616	0.715536	gene-BC332_26583	BC332_26583	1
MF	GO:0030414	peptidase inhibitor activity	1/120	60/17698	0.335616	0.715536	gene-BC332_26583	BC332_26583	1
MF	GO:0061134	peptidase regulator activity	1/120	60/17698	0.335616	0.715536	gene-BC332_26583	BC332_26583	1
MF	GO:0061135	endopeptidase regulator activity	1/120	60/17698	0.335616	0.715536	gene-BC332_26583	BC332_26583	1
MF	GO:0015238	drug transmembrane transporter activity	1/120	62/17698	0.344626	0.715536	novel.4151	-	1
MF	GO:0003924	GTPase activity	1/120	69/17698	0.375216	0.715536	gene-BC332_04513	BC332_04513	1
MF	GO:0016746	transferase activity, transferring acyl groups	3/120	329/17698	0.386291	0.715536	gene-BC332_08693/gene-BC332_24759/gene-BC332_21779	BC332_08693/BC332_24759/BC332_21779	3
MF	GO:0030234	enzyme regulator activity	2/120	203/17698	0.401189	0.715536	gene-BC332_26583/gene-BC332_06452	BC332_26583/BC332_06452	2
MF	GO:0022804	active transmembrane transporter activity	2/120	210/17698	0.417737	0.715536	novel.4151/gene-BC332_00174	-/BC332_00174	2
MF	GO:0022890	inorganic cation transmembrane transporter activity	2/120	213/17698	0.424759	0.715536	novel.2012/gene-BC332_05903	-/BC332_05903	2
MF	GO:0016758	transferase activity, transferring hexosyl groups	3/120	351/17698	0.426358	0.715536	gene-BC332_23622/gene-BC332_19563/novel.4834	BC332_23622/BC332_19563/-	3
MF	GO:0004842	ubiquitin-protein transferase activity	1/120	84/17698	0.436081	0.715536	gene-BC332_21446	BC332_21446	1
MF	GO:0019787	ubiquitin-like protein transferase activity	1/120	84/17698	0.436081	0.715536	gene-BC332_21446	BC332_21446	1
MF	GO:0003723	RNA binding	3/120	363/17698	0.447846	0.715536	gene-BC332_10553/gene-BC332_19010/gene-BC332_14794	BC332_10553/BC332_19010/BC332_14794	3
MF	GO:0008289	lipid binding	1/120	89/17698	0.455032	0.715536	gene-BC332_15474	BC332_15474	1
MF	GO:0042626	ATPase activity, coupled to transmembrane movement of substances	1/120	90/17698	0.458746	0.715536	gene-BC332_00174	BC332_00174	1
MF	GO:0043492	ATPase activity, coupled to movement of substances	1/120	90/17698	0.458746	0.715536	gene-BC332_00174	BC332_00174	1
MF	GO:0098772	molecular function regulator	2/120	228/17698	0.459198	0.715536	gene-BC332_26583/gene-BC332_06452	BC332_26583/BC332_06452	2
MF	GO:0045735	nutrient reservoir activity	1/120	93/17698	0.469738	0.715536	gene-BC332_22056	BC332_22056	1
MF	GO:0001883	purine nucleoside binding	2/120	233/17698	0.470414	0.715536	gene-BC332_04063/gene-BC332_04513	BC332_04063/BC332_04513	2
MF	GO:0005525	GTP binding	2/120	233/17698	0.470414	0.715536	gene-BC332_04063/gene-BC332_04513	BC332_04063/BC332_04513	2
MF	GO:0032549	ribonucleoside binding	2/120	233/17698	0.470414	0.715536	gene-BC332_04063/gene-BC332_04513	BC332_04063/BC332_04513	2
MF	GO:0032550	purine ribonucleoside binding	2/120	233/17698	0.470414	0.715536	gene-BC332_04063/gene-BC332_04513	BC332_04063/BC332_04513	2
MF	GO:0032561	guanyl ribonucleotide binding	2/120	233/17698	0.470414	0.715536	gene-BC332_04063/gene-BC332_04513	BC332_04063/BC332_04513	2
MF	GO:0001882	nucleoside binding	2/120	234/17698	0.472641	0.715536	gene-BC332_04063/gene-BC332_04513	BC332_04063/BC332_04513	2
MF	GO:0004553	hydrolase activity, hydrolyzing O-glycosyl compounds	3/120	378/17698	0.474252	0.715536	gene-BC332_29744/gene-BC332_29743/gene-BC332_29742	BC332_29744/BC332_29743/BC332_29742	3
MF	GO:0008324	cation transmembrane transporter activity	2/120	235/17698	0.474863	0.715536	novel.2012/gene-BC332_05903	-/BC332_05903	2
MF	GO:0019001	guanyl nucleotide binding	2/120	240/17698	0.485885	0.715536	gene-BC332_04063/gene-BC332_04513	BC332_04063/BC332_04513	2
MF	GO:0016887	ATPase activity	2/120	246/17698	0.498923	0.715536	gene-BC332_32406/gene-BC332_00174	BC332_32406/BC332_00174	2
MF	GO:0015297	antiporter activity	1/120	102/17698	0.501401	0.715536	novel.4151	-	1
MF	GO:0015399	primary active transmembrane transporter activity	1/120	102/17698	0.501401	0.715536	gene-BC332_00174	BC332_00174	1
MF	GO:0015405	P-P-bond-hydrolysis-driven transmembrane transporter activity	1/120	102/17698	0.501401	0.715536	gene-BC332_00174	BC332_00174	1
MF	GO:0016798	hydrolase activity, acting on glycosyl bonds	3/120	400/17698	0.51192	0.715536	gene-BC332_29744/gene-BC332_29743/gene-BC332_29742	BC332_29744/BC332_29743/BC332_29742	3
MF	GO:0003777	microtubule motor activity	1/120	107/17698	0.518174	0.715536	gene-BC332_05598	BC332_05598	1
MF	GO:0015291	secondary active transmembrane transporter activity	1/120	108/17698	0.521461	0.715536	novel.4151	-	1
MF	GO:0008194	UDP-glycosyltransferase activity	1/120	110/17698	0.527968	0.715536	gene-BC332_19563	BC332_19563	1
MF	GO:0042623	ATPase activity, coupled	1/120	114/17698	0.540721	0.717167	gene-BC332_00174	BC332_00174	1
MF	GO:0008017	microtubule binding	1/120	115/17698	0.543855	0.717167	gene-BC332_05598	BC332_05598	1
MF	GO:0015631	tubulin binding	1/120	117/17698	0.55006	0.717167	gene-BC332_05598	BC332_05598	1
MF	GO:0016757	transferase activity, transferring glycosyl groups	3/120	441/17698	0.578161	0.719445	gene-BC332_23622/gene-BC332_19563/novel.4834	BC332_23622/BC332_19563/-	3
MF	GO:0042578	phosphoric ester hydrolase activity	1/120	127/17698	0.579852	0.719445	gene-BC332_05810	BC332_05810	1
MF	GO:0016853	isomerase activity	1/120	128/17698	0.582721	0.719445	gene-BC332_30541	BC332_30541	1
MF	GO:0016891	endoribonuclease activity, producing 5'-phosphomonoesters	1/120	130/17698	0.588402	0.719445	gene-BC332_19010	BC332_19010	1
MF	GO:0016893	endonuclease activity, active with either ribo- or deoxyribonucleic acids and producing 5'-phosphomonoesters	1/120	130/17698	0.588402	0.719445	gene-BC332_19010	BC332_19010	1
MF	GO:0003774	motor activity	1/120	135/17698	0.60227	0.719445	gene-BC332_05598	BC332_05598	1
MF	GO:0016874	ligase activity	1/120	136/17698	0.604987	0.719445	gene-BC332_01432	BC332_01432	1
MF	GO:0016616	oxidoreductase activity, acting on the CH-OH group of donors, NAD or NADP as acceptor	1/120	137/17698	0.607687	0.719445	gene-BC332_19572	BC332_19572	1
MF	GO:0050660	flavin adenine dinucleotide binding	1/120	154/17698	0.650871	0.750032	gene-BC332_22615	BC332_22615	1
MF	GO:0015318	inorganic molecular entity transmembrane transporter activity	2/120	327/17698	0.653335	0.750032	novel.2012/gene-BC332_05903	-/BC332_05903	2
MF	GO:0004521	endoribonuclease activity	1/120	157/17698	0.657986	0.750032	gene-BC332_19010	BC332_19010	1
MF	GO:0000287	magnesium ion binding	1/120	159/17698	0.66265	0.750032	gene-BC332_29949	BC332_29949	1
MF	GO:0004540	ribonuclease activity	1/120	165/17698	0.676266	0.751436	gene-BC332_19010	BC332_19010	1
MF	GO:0004519	endonuclease activity	1/120	166/17698	0.678481	0.751436	gene-BC332_19010	BC332_19010	1
MF	GO:0015075	ion transmembrane transporter activity	2/120	352/17698	0.692735	0.759061	novel.2012/gene-BC332_05903	-/BC332_05903	2
MF	GO:0005509	calcium ion binding	1/120	205/17698	0.754105	0.817608	gene-BC332_21703	BC332_21703	1
MF	GO:0009055	electron transfer activity	1/120	211/17698	0.764055	0.819767	gene-BC332_18333	BC332_18333	1
MF	GO:0016614	oxidoreductase activity, acting on CH-OH group of donors	1/120	226/17698	0.787218	0.835912	gene-BC332_19572	BC332_19572	1
MF	GO:0004518	nuclease activity	1/120	240/17698	0.806796	0.847959	gene-BC332_19010	BC332_19010	1
MF	GO:0004175	endopeptidase activity	1/120	258/17698	0.829364	0.862874	gene-BC332_25893	BC332_25893	1
MF	GO:0008168	methyltransferase activity	1/120	300/17698	0.872362	0.898532	gene-BC332_14484	BC332_14484	1
MF	GO:0016741	transferase activity, transferring one-carbon groups	1/120	313/17698	0.883348	0.90084	gene-BC332_14484	BC332_14484	1
MF	GO:0140098	catalytic activity, acting on RNA	1/120	410/17698	0.940531	0.949752	gene-BC332_19010	BC332_19010	1
MF	GO:0050662	coenzyme binding	1/120	447/17698	0.954054	0.954054	gene-BC332_22615	BC332_22615	1
