# Supplementary material for: Establishment of in vitro regeneration system and molecular analysis of early development of somatic callus in Capsicum chinense and Capsicum baccatum
Source: Front Plant Sci. 2022 Nov 17;13:1025497. doi: 10.3389/fpls.2022.1025497 (PMC9714296; doi:10.3389/fpls.2022.1025497)
Supplement: Supplementary file 8 [file Table_8.xlsx]

## Sheet: CBa6vsCBa3
Supplementary Table S8. Information of DEG encoding transcription factor
Gene_id	Log2FoldChange	Gene_description	TF_family	Number
gene-BC332_11997	5.79757	hypothetical protein	p450	13
gene-BC332_29022	3.02809	Flavonoid 3'%2C5'-hydroxylase	p450	13
gene-BC332_26580	3.01347	hypothetical protein	p450	13
gene-BC332_11998	2.87307	hypothetical protein	p450	13
gene-BC332_19512	2.56958	Cytochrome	p450	13
gene-BC332_33640	2.55519	Abscisic acid 8'-hydroxylase 3	p450	13
gene-BC332_01349	2.53532	CytochromeB1	p450	13
gene-BC332_01350	2.48793	CytochromeC1	p450	13
gene-BC332_09110	2.04354	Flavonoid 3'-monooxygenase	p450	13
gene-BC332_18239	2.01481	Geraniol 8-hydroxylase	p450	13
gene-BC332_04939	1.93306	hypothetical protein	p450	13
gene-BC332_12647	1.77507	Cytochrome	p450	13
gene-BC332_21624	-2.28865	Cytochrome 78A9	p450	13
gene-BC332_16891	8.48535	hypothetical protein	2OG-FeII_Oxy	8
gene-BC332_05284	2.74232	Naringenin%2C2-oxoglutarate 3-dioxygenase	2OG-FeII_Oxy	8
gene-BC332_16893	2.58581	hypothetical protein	2OG-FeII_Oxy	8
gene-BC332_08691	2.12479	hypothetical protein	2OG-FeII_Oxy	8
gene-BC332_20709	1.70527	Thebaine 6-O-demethylase	2OG-FeII_Oxy	8
gene-BC332_32191	-1.3556	Hyoscyamine 6-dioxygenase	2OG-FeII_Oxy	8
gene-BC332_28826	-1.35789	Hyoscyamine 6-dioxygenase	2OG-FeII_Oxy	8
gene-BC332_17414	-1.45028	hypothetical protein	2OG-FeII_Oxy	8
gene-BC332_19182	6.19807	Myb-related protein Myb4	Myb_DNA-binding	5
gene-BC332_31414	2.86816	Transcription factor	Myb_DNA-binding	5
gene-BC332_14002	2.29724	Transcription factor	Myb_DNA-binding	5
gene-BC332_10237	2.09738	putative Myb family transcription factor	Myb_DNA-binding	5
gene-BC332_22966	1.77937	Transcription factor RAX2	Myb_DNA-binding	5
gene-BC332_26545	3.20206	Tropinone reductase 2	adh_short	4
gene-BC332_08718	2.44115	11-beta-hydroxysteroid dehydrogenase 1A	adh_short	4
gene-BC332_26543	1.38547	Tropinone reductase 2	adh_short	4
gene-BC332_11287	1.33871	Tropinone reductase -like protein	adh_short	4
gene-BC332_26572	3.95597	Cysteine-rich receptor-like protein kinase 25	Pkinase	4
gene-BC332_30213	1.95153	hypothetical protein	Pkinase	4
gene-BC332_10202	1.67742	hypothetical protein	Pkinase	4
gene-BC332_07982	1.20361	LRR receptor-like serine/threonine-protein kinase ERECTA	Pkinase	4
gene-BC332_07381	-1.91908	Protein STRUBBELIG-RECEPTOR FAMILY 2	Pkinase	4
gene-BC332_19175	2.06982	G-type lectin S-receptor-like serine/threonine-protein kinase	Pkinase_Tyr	4
gene-BC332_08983	-1.30989	Serine/threonine-protein kinase HT1	Pkinase_Tyr	4
gene-BC332_21903	-2.147	Receptor-like cytosolic serine/threonine-protein kinase RBK2	Pkinase_Tyr	4
gene-BC332_12535	-4.17784	Serine/threonine-protein kinase HT1	Pkinase_Tyr	4
gene-BC332_22213	3.04252	Pathogenesis-related protein 1C	SCP	4
gene-BC332_22222	2.18438	Basic form of pathogenesis-related protein 1	SCP	4
novel.6291	1.38247	PF00188:Cysteine-rich secretory protein family	SCP	4
gene-BC332_03722	-1.25244	STS14 protein	SCP	4
gene-BC332_10132	2.12073	ABC transporter B family member 12	ABC_membrane	3
gene-BC332_16890	2.442	Pleiotropic drug resistance protein 1	ABC2_membrane	3
gene-BC332_12698	1.86212	ABC transporter G family member 1	ABC2_membrane	3
gene-BC332_15737	2.24926	Alcohol dehydrogenase 2	ADH_zinc_N	3
gene-BC332_28618	2.13148	putative trans-2-enoyl-CoA reductase%2C mitochondrial	ADH_zinc_N	3
gene-BC332_11142	1.74078	Alcohol dehydrogenase 1	ADH_zinc_N	3
gene-BC332_07153	3.96976	Indole-3-acetic acid-induced protein ARG7	Auxin_inducible	3
gene-BC332_29560	3.55167	Auxin-responsive protein SAUR67	Auxin_inducible	3
gene-BC332_17049	3.36842	Auxin-induced protein 15A	Auxin_inducible	3
gene-BC332_12393	3.00601	Cytokinin dehydrogenase 1	FAD_binding_4	3
gene-BC332_24729	2.19611	Cytokinin dehydrogenase 5	FAD_binding_4	3
gene-BC332_04854	1.25545	hypothetical protein	FAD_binding_4	3
gene-BC332_05196	2.13048	Protein trichome birefringence-like 34	RVT_2	3
novel.7321	1.85464	PF07727:Reverse transcriptase (RNA-dependent DNA polymerase)	RVT_2	3
novel.10894	1.66569	PF07727:Reverse transcriptase (RNA-dependent DNA polymerase)	RVT_2	3
gene-BC332_06043	2.18505	hypothetical protein	Aldose_epim	2
novel.2033	1.17033	PF01263:Aldose 1-epimerase	Aldose_epim	2
gene-BC332_28017	3.2953	putative acyl-activating enzyme 2	AMP-binding	2
gene-BC332_05190	2.84262	putative acyl-activating enzyme 2	AMP-binding	2
gene-BC332_09540	3.13063	hypothetical protein	AP2	2
gene-BC332_25240	1.43784	Ethylene-responsive transcription factor 9	AP2	2
gene-BC332_23179	2.17502	putative glutathione S-transferase	GST_C	2
gene-BC332_28013	1.43373	Glutathione S-transferase U16	GST_C	2
gene-BC332_08437	4.13894	hypothetical protein	HMA	2
gene-BC332_00921	3.70113	hypothetical protein	HMA	2
gene-BC332_33266	-1.37664	Phospholipase A1-II 1	Lipase_3	2
gene-BC332_33264	-1.58661	Phospholipase A1-II 1	Lipase_3	2
gene-BC332_30439	3.29956	GDSL esterase/lipase	Lipase_GDSL	2
gene-BC332_04355	1.07556	GDSL esterase/lipase	Lipase_GDSL	2
gene-BC332_02141	1.1727	Somatic embryogenesis receptor kinase 1	LRRNT_2	2
gene-BC332_31811	-3.13978	hypothetical protein	LRRNT_2	2
gene-BC332_23224	2.86516	hypothetical protein	NAD_binding_4	2
gene-BC332_28865	-2.642	hypothetical protein	NAD_binding_4	2
gene-BC332_27797	1.82159	hypothetical protein	NB-ARC	2
gene-BC332_12896	1.64166	hypothetical protein	NB-ARC	2
gene-BC332_04431	2.12796	hypothetical protein	Peptidase_C1	2
gene-BC332_04048	-2.62818	hypothetical protein	Peptidase_C1	2
gene-BC332_20750	2.42601	Serine carboxypeptidase-like 17	Peptidase_S10	2
gene-BC332_29446	1.70373	Serine carboxypeptidase-like 2	Peptidase_S10	2
gene-BC332_00346	2.03128	hypothetical protein	Thaumatin	2
gene-BC332_00347	1.90421	Thaumatin-like protein	Thaumatin	2
gene-BC332_05369	1.05884	hypothetical protein	Abhydrolase_1	1
gene-BC332_33698	1.36345	hypothetical protein	Abhydrolase_3	1
gene-BC332_19750	3.50317	Glycerol-3-phosphate 2-O-acyltransferase 6	Acyltransferase	1
novel.11585	-3.57518	PF00266:Aminotransferase class-V	Aminotran_5	1
novel.2771	-1.52706	PF00665:Integrase core domain|PF13976:GAG-pre-integrase domain|PF01786:Alternative oxidase|PF07727:Reverse transcriptase (RNA-dependent DNA polymerase)	AOX	1
gene-BC332_19472	1.22127	hypothetical protein	B_lectin	1
gene-BC332_26727	1.84423	Regulatory protein NPR5	BTB	1
gene-BC332_02782	1.92248	hypothetical protein	C1_3	1
gene-BC332_24682	3.25662	Nuclear transcription factor Y subunit A-6	CBFB_NFYA	1
gene-BC332_31231	2.98724	Chalcone synthase 2	Chal_sti_synt_N	1
gene-BC332_30746	-1.68967	hypothetical protein	Cu_bind_like	1
gene-BC332_02570	-2.34393	hypothetical protein	Epimerase	1
gene-BC332_08260	1.55851	Ferric reduction oxidase 5	FAD_binding_8	1
gene-BC332_29946	-1.54764	Ferredoxin-3%2C chloroplastic	Fer2	1
gene-BC332_20095	1.71926	putative inactive beta-glucosidase 14	Glyco_hydro_1	1
novel.7368	2.38388	PF05699:hAT family C-terminal dimerisation region	hATC	1
gene-BC332_08251	-1.68305	Heat shock protein 82	HATPase_c	1
gene-BC332_01633	-1.33597	Homeobox-leucine zipper protein ATHB-4	HD-ZIP_N	1
gene-BC332_24973	-2.48508	Homeobox-leucine zipper protein HOX6	Homeobox	1
novel.10502	-2.97355	PF01627:Hpt domain	Hpt	1
gene-BC332_19469	1.25671	hypothetical protein	HSF_DNA-bind	1
gene-BC332_34218	-2.44478	Adenylate isopentenyltransferase 5%2C chloroplastic	IPPT	1
gene-BC332_15252	2.12812	Protein IQ-DOMAIN 31	IQ	1
gene-BC332_00215	1.86015	3-oxoacyl-[acyl-carrier-protein] synthase I%2C chloroplastic	ketoacyl-synt	1
novel.7648	1.39265	PF00305:Lipoxygenase|PF01477:PLAT/LH2 domain	Lipoxygenase	1
gene-BC332_22247	2.10561	hypothetical protein	Mpv17_PMP22	1
gene-BC332_14998	-1.58659	hypothetical protein	Na_Ca_ex	1
gene-BC332_07746	1.60575	Protein CUP-SHAPED COTYLEDON 3	NAM	1
gene-BC332_26310	-1.42788	hypothetical protein	Peptidase_S8	1
gene-BC332_25489	-3.00399	hypothetical protein	PG_binding_1	1
gene-BC332_29216	2.24361	hypothetical protein	RPE65	1
gene-BC332_27642	1.52221	putative WRKY transcription factor 28	WRKY	1

## Sheet: CBb6vsCBb3
Supplementary Table S8. Information of DEG encoding transcription factor
Gene_id	Log2FoldChange	Gene_description	TF_family	Number
gene-BC332_18209	5.4465	hypothetical protein	p450	49
gene-BC332_09060	4.07394	Cytochrome 78A5	p450	49
gene-BC332_16083	3.49101	Beta-amyrin 28-oxidase	p450	49
gene-BC332_11997	3.24391	hypothetical protein	p450	49
gene-BC332_26428	3.17106	Cytochrome 94C1	p450	49
gene-BC332_33640	3.16772	Abscisic acid 8'-hydroxylase 3	p450	49
gene-BC332_15891	3.09008	hypothetical protein	p450	49
gene-BC332_00448	2.85535	hypothetical protein	p450	49
gene-BC332_29022	2.79433	Flavonoid 3'%2C5'-hydroxylase	p450	49
gene-BC332_11998	2.69442	hypothetical protein	p450	49
gene-BC332_11996	2.6807	Cytochrome P450 82A1	p450	49
gene-BC332_26580	2.56521	hypothetical protein	p450	49
gene-BC332_06432	2.56345	hypothetical protein	p450	49
gene-BC332_04939	2.51599	hypothetical protein	p450	49
gene-BC332_06257	2.23145	Geraniol 8-hydroxylase	p450	49
gene-BC332_25061	2.17956	9-divinyl ether synthase	p450	49
gene-BC332_01349	2.17187	CytochromeB1	p450	49
gene-BC332_11989	2.16203	hypothetical protein	p450	49
gene-BC332_19735	2.13637	CytochromeB1	p450	49
gene-BC332_01350	2.05093	CytochromeC1	p450	49
gene-BC332_12646	1.92683	Cytochrome	p450	49
gene-BC332_13429	1.91625	Cytochrome 78A6	p450	49
gene-BC332_06856	1.80111	Geraniol 8-hydroxylase	p450	49
gene-BC332_26369	1.76942	Cytochrome 76A2	p450	49
gene-BC332_26989	1.67169	Cytochrome 98A2	p450	49
gene-BC332_19069	1.55193	Abscisic acid 8'-hydroxylase 1	p450	49
gene-BC332_18239	1.51106	Geraniol 8-hydroxylase	p450	49
gene-BC332_15757	1.47841	5-epiaristolochene 1%2C3-dihydroxylase	p450	49
gene-BC332_12647	1.43101	Cytochrome	p450	49
gene-BC332_11988	1.373	Cytochrome 82A3	p450	49
gene-BC332_05294	1.33511	Cytokinin hydroxylase	p450	49
gene-BC332_03690	1.33002	Geraniol 8-hydroxylase	p450	49
gene-BC332_30314	1.32747	hypothetical protein	p450	49
gene-BC332_16338	1.29676	Cytochrome 94A2	p450	49
gene-BC332_19512	1.2847	Cytochrome	p450	49
gene-BC332_26021	1.19391	Cytochrome 76A2	p450	49
gene-BC332_11890	1.02356	hypothetical protein	p450	49
gene-BC332_27492	1.01013	Cytochrome	p450	49
gene-BC332_25053	-1.06906	Cytochrome	p450	49
gene-BC332_25056	-1.10791	Cytochrome	p450	49
gene-BC332_19500	-1.13771	Cytochrome	p450	49
novel.9008	-1.18736	PF00067:Cytochrome P450	p450	49
gene-BC332_06427	-1.60591	hypothetical protein	p450	49
gene-BC332_26373	-1.70294	Cytochrome 76A2	p450	49
gene-BC332_05663	-1.78302	hypothetical protein	p450	49
gene-BC332_25723	-1.94022	hypothetical protein	p450	49
gene-BC332_19621	-2.01501	Cytochrome	p450	49
gene-BC332_18802	-2.09794	Cytochrome 82C4	p450	49
gene-BC332_32624	-2.15443	hypothetical protein	p450	49
gene-BC332_26572	6.78674	Cysteine-rich receptor-like protein kinase 25	Pkinase	45
novel.3335	6.4385	PF00069:Protein kinase domain|PF13855:Leucine rich repeat	Pkinase	45
gene-BC332_09458	5.92582	hypothetical protein	Pkinase	45
novel.3317	5.71154	PF13855:Leucine rich repeat|PF00069:Protein kinase domain	Pkinase	45
gene-BC332_26573	5.35032	hypothetical protein	Pkinase	45
gene-BC332_23880	4.73076	Leucine-rich repeat receptor-like protein kinase PXL1	Pkinase	45
gene-BC332_20043	3.05826	G-type lectin S-receptor-like serine/threonine-protein kinase	Pkinase	45
gene-BC332_10370	3.02339	hypothetical protein	Pkinase	45
gene-BC332_20003	2.4356	putative leucine-rich repeat receptor-like protein kinase	Pkinase	45
gene-BC332_16547	2.26559	putative inactive receptor kinase	Pkinase	45
gene-BC332_04373	2.13841	hypothetical protein	Pkinase	45
gene-BC332_11918	2.13636	putative inactive receptor kinase	Pkinase	45
gene-BC332_11322	2.11806	hypothetical protein	Pkinase	45
novel.3376	2.07655	PF00069:Protein kinase domain|PF13855:Leucine rich repeat	Pkinase	45
gene-BC332_23554	1.8662	L-type lectin-domain containing receptor kinase IV.3	Pkinase	45
gene-BC332_30213	1.75093	hypothetical protein	Pkinase	45
gene-BC332_12464	1.6769	hypothetical protein	Pkinase	45
novel.9413	1.57759	PF00069:Protein kinase domain	Pkinase	45
gene-BC332_22879	1.47503	hypothetical protein	Pkinase	45
gene-BC332_07982	1.44201	LRR receptor-like serine/threonine-protein kinase ERECTA	Pkinase	45
gene-BC332_17724	1.37767	Leucine-rich repeat receptor-like serine/threonine/tyrosine-protein kinase SOBIR1	Pkinase	45
gene-BC332_17109	1.34232	putative serine/threonine-protein kinase RLCKVII	Pkinase	45
gene-BC332_07871	1.31134	Leucine-rich repeat receptor-like protein kinase TDR	Pkinase	45
gene-BC332_08117	1.19086	Leucine-rich repeat receptor protein kinase EMS1	Pkinase	45
gene-BC332_11394	1.11458	BRASSINOSTEROID INSENSITIVE 1-associated receptor kinase 1	Pkinase	45
gene-BC332_12429	1.077	hypothetical protein	Pkinase	45
gene-BC332_05607	1.01837	LRR receptor-like serine/threonine-protein kinase HSL2	Pkinase	45
gene-BC332_11494	1.01359	hypothetical protein	Pkinase	45
gene-BC332_07032	-1.00997	putative serine/threonine-protein kinase WNK1	Pkinase	45
gene-BC332_08642	-1.02018	hypothetical protein	Pkinase	45
gene-BC332_03097	-1.10438	Leucine-rich repeat receptor-like protein kinase PXL2	Pkinase	45
gene-BC332_17524	-1.14598	Serine/threonine-protein kinase PBS1	Pkinase	45
gene-BC332_07381	-1.24146	Protein STRUBBELIG-RECEPTOR FAMILY 2	Pkinase	45
gene-BC332_29252	-1.29668	hypothetical protein	Pkinase	45
gene-BC332_15582	-1.42784	Serine/threonine-protein kinase BLUS1	Pkinase	45
gene-BC332_06873	-1.4566	CBL-interacting serine/threonine-protein kinase 7	Pkinase	45
gene-BC332_25383	-1.4624	putative serine/threonine-protein kinase WNK6	Pkinase	45
gene-BC332_05524	-1.73569	putative receptor-like protein kinase	Pkinase	45
gene-BC332_31604	-1.98596	hypothetical protein	Pkinase	45
gene-BC332_18566	-2.02567	hypothetical protein	Pkinase	45
gene-BC332_01495	-2.61225	Calcium-dependent protein kinase 17	Pkinase	45
gene-BC332_01131	-2.86249	CBL-interacting serine/threonine-protein kinase 12	Pkinase	45
gene-BC332_29798	-2.89015	Serine/threonine-protein kinase SAPK2	Pkinase	45
gene-BC332_14728	-4.20406	hypothetical protein	Pkinase	45
gene-BC332_12496	-6.27138	Receptor-like cytosolic serine/threonine-protein kinase RBK1	Pkinase	45
gene-BC332_11830	2.41331	hypothetical protein	NB-ARC	18
gene-BC332_26940	2.08544	hypothetical protein	NB-ARC	18
gene-BC332_08656	1.79898	hypothetical protein	NB-ARC	18
gene-BC332_31895	1.75691	hypothetical protein	NB-ARC	18
gene-BC332_18109	1.58816	Eukaryotic translation initiation factor isoform 4G-1	NB-ARC	18
gene-BC332_28902	1.45765	hypothetical protein	NB-ARC	18
gene-BC332_32668	1.27889	hypothetical protein	NB-ARC	18
gene-BC332_22020	1.14281	hypothetical protein	NB-ARC	18
gene-BC332_20293	-1.01155	hypothetical protein	NB-ARC	18
gene-BC332_26877	-1.25529	hypothetical protein	NB-ARC	18
gene-BC332_30776	-1.2937	hypothetical protein	NB-ARC	18
gene-BC332_29910	-1.39702	hypothetical protein	NB-ARC	18
gene-BC332_27131	-1.49882	hypothetical protein	NB-ARC	18
gene-BC332_34313	-1.53802	hypothetical protein	NB-ARC	18
gene-BC332_06323	-1.6133	hypothetical protein	NB-ARC	18
gene-BC332_20292	-1.65489	hypothetical protein	NB-ARC	18
gene-BC332_04320	-1.82074	hypothetical protein	NB-ARC	18
novel.3283	-2.54773	PF00931:NB-ARC domain	NB-ARC	18
gene-BC332_20707	5.42373	Thebaine 6-O-demethylase	2OG-FeII_Oxy	17
gene-BC332_05284	3.12359	Naringenin%2C2-oxoglutarate 3-dioxygenase	2OG-FeII_Oxy	17
gene-BC332_16891	2.84039	hypothetical protein	2OG-FeII_Oxy	17
gene-BC332_20709	2.66776	Thebaine 6-O-demethylase	2OG-FeII_Oxy	17
gene-BC332_06798	2.48148	1-aminocyclopropane-1-carboxylate oxidase -like protein 3	2OG-FeII_Oxy	17
gene-BC332_08691	1.87071	hypothetical protein	2OG-FeII_Oxy	17
gene-BC332_04921	1.7759	Gibberellin 2-beta-dioxygenase 8	2OG-FeII_Oxy	17
gene-BC332_16893	1.76274	hypothetical protein	2OG-FeII_Oxy	17
gene-BC332_24272	1.61626	1-aminocyclopropane-1-carboxylate oxidase 1	2OG-FeII_Oxy	17
gene-BC332_23039	1.55762	Flavonol synthase/flavanone 3-hydroxylase	2OG-FeII_Oxy	17
gene-BC332_20717	1.02406	Protein SRG1	2OG-FeII_Oxy	17
gene-BC332_05563	-1.01967	putative 2-oxoglutarate-dependent dioxygenase	2OG-FeII_Oxy	17
gene-BC332_05082	-1.10895	1-aminocyclopropane-1-carboxylate oxidase	2OG-FeII_Oxy	17
gene-BC332_33654	-1.22743	1-aminocyclopropane-1-carboxylate oxidase	2OG-FeII_Oxy	17
gene-BC332_17414	-1.45809	hypothetical protein	2OG-FeII_Oxy	17
gene-BC332_24409	-2.01035	1-aminocyclopropane-1-carboxylate oxidase -like protein	2OG-FeII_Oxy	17
gene-BC332_19708	-5.25942	Gibberellin 2-beta-dioxygenase 1	2OG-FeII_Oxy	17
gene-BC332_17867	2.19777	hypothetical protein	Pkinase_Tyr	17
gene-BC332_11556	2.0477	hypothetical protein	Pkinase_Tyr	17
gene-BC332_23037	1.94571	hypothetical protein	Pkinase_Tyr	17
gene-BC332_05095	1.86133	Chitin elicitor receptor kinase 1	Pkinase_Tyr	17
gene-BC332_13058	1.74616	G-type lectin S-receptor-like serine/threonine-protein kinase	Pkinase_Tyr	17
gene-BC332_13062	1.68177	hypothetical protein	Pkinase_Tyr	17
gene-BC332_20044	1.59817	G-type lectin S-receptor-like serine/threonine-protein kinase	Pkinase_Tyr	17
gene-BC332_01235	1.32975	hypothetical protein	Pkinase_Tyr	17
gene-BC332_21901	1.12015	hypothetical protein	Pkinase_Tyr	17
gene-BC332_20163	1.06865	putative LRR receptor-like serine/threonine-protein kinase	Pkinase_Tyr	17
gene-BC332_16247	1.05238	Serine/threonine-protein kinase	Pkinase_Tyr	17
gene-BC332_11985	-1.02891	hypothetical protein	Pkinase_Tyr	17
novel.2000	-1.09797	PF07714:Protein tyrosine kinase|PF00069:Protein kinase domain	Pkinase_Tyr	17
gene-BC332_19450	-1.11805	hypothetical protein	Pkinase_Tyr	17
gene-BC332_00235	-1.76234	hypothetical protein	Pkinase_Tyr	17
gene-BC332_21903	-2.03079	Receptor-like cytosolic serine/threonine-protein kinase RBK2	Pkinase_Tyr	17
gene-BC332_05585	-2.17435	Nodulation receptor kinase	Pkinase_Tyr	17
novel.11364	6.04798	PF00201:UDP-glucoronosyl and UDP-glucosyl transferase	UDPGT	17
novel.11556	2.50273	PF00201:UDP-glucoronosyl and UDP-glucosyl transferase	UDPGT	17
novel.12306	2.29955	PF00201:UDP-glucoronosyl and UDP-glucosyl transferase	UDPGT	17
novel.6137	2.28988	PF00201:UDP-glucoronosyl and UDP-glucosyl transferase	UDPGT	17
novel.8089	2.17027	PF00201:UDP-glucoronosyl and UDP-glucosyl transferase	UDPGT	17
novel.10411	1.56207	PF00201:UDP-glucoronosyl and UDP-glucosyl transferase	UDPGT	17
novel.8939	1.35804	PF00201:UDP-glucoronosyl and UDP-glucosyl transferase	UDPGT	17
novel.8595	1.11593	PF00201:UDP-glucoronosyl and UDP-glucosyl transferase	UDPGT	17
novel.3196	1.10039	PF00201:UDP-glucoronosyl and UDP-glucosyl transferase	UDPGT	17
novel.12281	-1.03156	PF00201:UDP-glucoronosyl and UDP-glucosyl transferase	UDPGT	17
novel.11367	-1.13172	PF00201:UDP-glucoronosyl and UDP-glucosyl transferase	UDPGT	17
novel.4358	-1.15674	PF00201:UDP-glucoronosyl and UDP-glucosyl transferase	UDPGT	17
novel.4356	-1.16635	PF00201:UDP-glucoronosyl and UDP-glucosyl transferase	UDPGT	17
novel.4834	-1.23302	PF00201:UDP-glucoronosyl and UDP-glucosyl transferase	UDPGT	17
novel.4833	-1.72055	PF00201:UDP-glucoronosyl and UDP-glucosyl transferase	UDPGT	17
novel.4796	-2.23902	PF00201:UDP-glucoronosyl and UDP-glucosyl transferase	UDPGT	17
novel.9959	-3.00391	PF00201:UDP-glucoronosyl and UDP-glucosyl transferase	UDPGT	17
gene-BC332_08670	6.82857	Subtilisin-like protease SBT3.3	Peptidase_S8	14
gene-BC332_04332	5.3463	hypothetical protein	Peptidase_S8	14
gene-BC332_04328	4.59623	hypothetical protein	Peptidase_S8	14
gene-BC332_08672	3.87878	Subtilisin-like protease SBT3.5	Peptidase_S8	14
gene-BC332_17503	3.11873	Subtilisin-like protease SBT1.2	Peptidase_S8	14
gene-BC332_26310	2.07755	hypothetical protein	Peptidase_S8	14
gene-BC332_20415	1.74037	hypothetical protein	Peptidase_S8	14
gene-BC332_11867	1.55579	Subtilisin-like protease SBT1.6	Peptidase_S8	14
gene-BC332_08669	1.18337	Subtilisin-like protease SBT3.3	Peptidase_S8	14
gene-BC332_24095	1.03125	Subtilisin-like protease	Peptidase_S8	14
gene-BC332_21675	-1.17219	hypothetical protein	Peptidase_S8	14
gene-BC332_30998	-1.34082	hypothetical protein	Peptidase_S8	14
gene-BC332_30999	-1.80642	hypothetical protein	Peptidase_S8	14
gene-BC332_11935	-2.76253	hypothetical protein	Peptidase_S8	14
gene-BC332_14002	2.1594	Transcription factor	Myb_DNA-binding	12
gene-BC332_10237	2.13543	putative Myb family transcription factor	Myb_DNA-binding	12
gene-BC332_14283	1.82625	Transcription repressor MYB5	Myb_DNA-binding	12
gene-BC332_22966	1.66189	Transcription factor RAX2	Myb_DNA-binding	12
gene-BC332_04479	1.35941	putative Myb family transcription factor	Myb_DNA-binding	12
gene-BC332_02702	1.21217	Transcription repressor MYB6	Myb_DNA-binding	12
gene-BC332_21478	1.08475	Protein ODORANT1	Myb_DNA-binding	12
gene-BC332_16135	1.00104	Myb-related protein	Myb_DNA-binding	12
gene-BC332_16646	-1.08513	Transcription factor MYB1R1	Myb_DNA-binding	12
gene-BC332_11900	-1.19132	Transcriptional activator Myb	Myb_DNA-binding	12
gene-BC332_28218	-2.45514	Myb-related protein	Myb_DNA-binding	12
gene-BC332_03892	-4.67148	Transcription factor MYB21	Myb_DNA-binding	12
gene-BC332_07394	3.4653	hypothetical protein	WRKY	12
gene-BC332_03008	3.22227	putative WRKY transcription factor 12	WRKY	12
gene-BC332_06185	3.00195	putative WRKY transcription factor 56	WRKY	12
gene-BC332_30500	2.94808	putative WRKY transcription factor 13	WRKY	12
gene-BC332_30517	2.47615	putative WRKY transcription factor 23	WRKY	12
gene-BC332_14014	2.37411	putative WRKY transcription factor 23	WRKY	12
gene-BC332_03843	1.96879	hypothetical protein	WRKY	12
gene-BC332_27642	1.74307	putative WRKY transcription factor 28	WRKY	12
gene-BC332_24089	1.5235	putative WRKY transcription factor 57	WRKY	12
gene-BC332_04245	1.51132	putative WRKY transcription factor 71	WRKY	12
gene-BC332_26043	1.49694	hypothetical protein	WRKY	12
gene-BC332_02470	-1.71079	putative WRKY transcription factor 28	WRKY	12
gene-BC332_09287	2.79052	AP2-like ethylene-responsive transcription factor	AP2	11
gene-BC332_16051	2.7754	Ethylene-responsive transcription factor	AP2	11
gene-BC332_07144	2.30995	Ethylene-responsive transcription factor RAP2-3	AP2	11
gene-BC332_01653	1.92117	Ethylene-responsive transcription factor 2	AP2	11
gene-BC332_00636	1.6827	Ethylene-responsive transcription factor 2	AP2	11
gene-BC332_13685	1.44346	Ethylene-responsive transcription factor 1B	AP2	11
gene-BC332_28239	1.44142	Ethylene-responsive transcription factor LEP	AP2	11
gene-BC332_10756	1.19199	Ethylene-responsive transcription factor	AP2	11
gene-BC332_25240	1.11988	Ethylene-responsive transcription factor 9	AP2	11
gene-BC332_21388	-1.1583	hypothetical protein	AP2	11
gene-BC332_06471	-1.25694	Ethylene-responsive transcription factor	AP2	11
gene-BC332_20215	5.44573	hypothetical protein	HLH	11
gene-BC332_05602	4.9021	hypothetical protein	HLH	11
gene-BC332_02622	3.51876	Transcription factor MUTE	HLH	11
gene-BC332_04467	2.41361	Transcription factor ALC	HLH	11
gene-BC332_16825	2.17182	hypothetical protein	HLH	11
gene-BC332_08317	1.61814	Transcription factor SPEECHLESS	HLH	11
gene-BC332_19664	1.28152	hypothetical protein	HLH	11
gene-BC332_08571	1.2766	Transcription factor bHLH74	HLH	11
gene-BC332_21616	1.22407	hypothetical protein	HLH	11
gene-BC332_03323	1.10373	hypothetical protein	HLH	11
gene-BC332_11716	1.07334	Transcription factor bHLH93	HLH	11
gene-BC332_04870	5.31273	hypothetical protein	FAD_binding_4	10
gene-BC332_12393	4.37403	Cytokinin dehydrogenase 1	FAD_binding_4	10
gene-BC332_34759	3.73575	Cytokinin dehydrogenase 3	FAD_binding_4	10
gene-BC332_24729	3.34471	Cytokinin dehydrogenase 5	FAD_binding_4	10
gene-BC332_20615	2.17141	Cytokinin dehydrogenase 5	FAD_binding_4	10
gene-BC332_04854	2.01417	hypothetical protein	FAD_binding_4	10
gene-BC332_04148	1.79631	hypothetical protein	FAD_binding_4	10
gene-BC332_00229	1.55461	Cytokinin dehydrogenase 7	FAD_binding_4	10
gene-BC332_32283	1.37202	Cytokinin dehydrogenase 5	FAD_binding_4	10
gene-BC332_04857	1.31115	hypothetical protein	FAD_binding_4	10
gene-BC332_04355	3.90286	GDSL esterase/lipase	Lipase_GDSL	9
gene-BC332_30439	3.85295	GDSL esterase/lipase	Lipase_GDSL	9
gene-BC332_12160	2.10043	GDSL esterase/lipase EXL2	Lipase_GDSL	9
gene-BC332_05726	1.84072	GDSL esterase/lipase	Lipase_GDSL	9
gene-BC332_02177	1.49478	GDSL esterase/lipase	Lipase_GDSL	9
gene-BC332_34383	1.2997	hypothetical protein	Lipase_GDSL	9
gene-BC332_28027	1.08276	GDSL esterase/lipase	Lipase_GDSL	9
gene-BC332_26133	-1.2477	GDSL esterase/lipase CPRD49	Lipase_GDSL	9
gene-BC332_17511	-1.79853	GDSL esterase/lipase	Lipase_GDSL	9
gene-BC332_18151	5.18997	hypothetical protein	LRRNT_2	9
gene-BC332_21920	3.2375	hypothetical protein	LRRNT_2	9
gene-BC332_32911	1.83659	hypothetical protein	LRRNT_2	9
gene-BC332_20846	1.41156	hypothetical protein	LRRNT_2	9
gene-BC332_12972	1.19092	hypothetical protein	LRRNT_2	9
gene-BC332_30097	-1.13656	hypothetical protein	LRRNT_2	9
gene-BC332_17795	-1.22325	Polygalacturonase inhibitor	LRRNT_2	9
gene-BC332_31809	-1.36144	hypothetical protein	LRRNT_2	9
gene-BC332_28002	-1.45106	hypothetical protein	LRRNT_2	9
novel.11745	4.6148	PF00106:short chain dehydrogenase|PF14413:Thg1 C terminal domain	adh_short	8
gene-BC332_26545	2.86372	Tropinone reductase 2	adh_short	8
gene-BC332_08718	2.26113	11-beta-hydroxysteroid dehydrogenase 1A	adh_short	8
gene-BC332_01290	1.76906	Short-chain dehydrogenase reductase 3a	adh_short	8
gene-BC332_26980	1.66887	hypothetical protein	adh_short	8
gene-BC332_33042	1.52506	hypothetical protein	adh_short	8
gene-BC332_26543	1.20239	Tropinone reductase 2	adh_short	8
gene-BC332_08610	1.01451	hypothetical protein	adh_short	8
gene-BC332_04185	2.90115	putative NAC domain-containing protein 94	NAM	8
gene-BC332_13227	2.10067	Protein CUP-SHAPED COTYLEDON 3	NAM	8
gene-BC332_15939	2.08012	NAC domain-containing protein 45	NAM	8
gene-BC332_16087	2.06444	NAC domain-containing protein 37	NAM	8
gene-BC332_10572	-1.32767	NAC domain-containing protein 48	NAM	8
gene-BC332_20183	-1.47198	NAC domain-containing protein	NAM	8
gene-BC332_20099	-2.11851	NAC domain-containing protein 72	NAM	8
gene-BC332_00770	-2.72436	NAC domain-containing protein 45	NAM	8
gene-BC332_12361	2.65537	Two-component response regulator ARR9	Response_reg	8
gene-BC332_04258	1.83286	Two-component response regulator ARR9	Response_reg	8
gene-BC332_26741	1.69593	Two-component response regulator ARR9	Response_reg	8
gene-BC332_32588	1.68336	Two-component response regulator ARR7	Response_reg	8
gene-BC332_13094	1.45426	Histidine kinase 4	Response_reg	8
gene-BC332_25291	1.43548	Two-component response regulator-like PRR73	Response_reg	8
gene-BC332_26762	1.30814	Two-component response regulator ARR9	Response_reg	8
gene-BC332_27960	1.10789	Two-component response regulator ARR3	Response_reg	8
gene-BC332_21982	2.29877	hypothetical protein	AAA	7
gene-BC332_27775	2.19479	hypothetical protein	AAA	7
gene-BC332_10639	1.82805	hypothetical protein	AAA	7
gene-BC332_08820	1.27121	Cell division cycle protein 48 -like protein	AAA	7
gene-BC332_04159	1.18364	hypothetical protein	AAA	7
gene-BC332_08664	1.13822	hypothetical protein	AAA	7
gene-BC332_25889	-1.17872	Ribulose bisphosphate carboxylase/oxygenase activase 2%2C chloroplastic	AAA	7
gene-BC332_10379	3.35722	Beta-glucosidase 16	Glyco_hydro_1	7
gene-BC332_10378	3.1564	Beta-glucosidase 47	Glyco_hydro_1	7
gene-BC332_09681	1.13395	Beta-glucosidase 43	Glyco_hydro_1	7
gene-BC332_29743	-1.07621	Beta-glucosidase 42	Glyco_hydro_1	7
gene-BC332_07092	-1.50233	Beta-glucosidase 11	Glyco_hydro_1	7
gene-BC332_07088	-1.54582	Beta-glucosidase 11	Glyco_hydro_1	7
gene-BC332_20059	-1.75207	Beta-glucosidase 34	Glyco_hydro_1	7
gene-BC332_04691	2.86464	Serine carboxypeptidase-like 32	Peptidase_S10	7
gene-BC332_15286	2.78515	Serine carboxypeptidase-like 40	Peptidase_S10	7
gene-BC332_29070	1.72061	Serine carboxypeptidase 3	Peptidase_S10	7
gene-BC332_20817	1.38271	Serine carboxypeptidase-like 9	Peptidase_S10	7
gene-BC332_23697	1.19527	Serine carboxypeptidase-like 9	Peptidase_S10	7
gene-BC332_11823	-1.115	Serine carboxypeptidase-like 17	Peptidase_S10	7
gene-BC332_33332	-1.30896	Serine carboxypeptidase II-3	Peptidase_S10	7
gene-BC332_16890	2.464	Pleiotropic drug resistance protein 1	ABC2_membrane	6
gene-BC332_30010	2.00309	Pleiotropic drug resistance protein 2	ABC2_membrane	6
gene-BC332_12698	1.66791	ABC transporter G family member 1	ABC2_membrane	6
gene-BC332_21330	1.48165	Pleiotropic drug resistance protein 3	ABC2_membrane	6
gene-BC332_32878	1.17535	ABC transporter G family member 33	ABC2_membrane	6
gene-BC332_33029	-1.16928	ABC transporter G family member 15	ABC2_membrane	6
gene-BC332_12391	4.22501	Glucan endo-1%2C3-beta-glucosidase	Glyco_hydro_17	6
gene-BC332_05935	3.16585	Glucan endo-1%2C3-beta-glucosidase	Glyco_hydro_17	6
gene-BC332_01721	2.89745	Glucan endo-1%2C3-beta-glucosidase%2C acidic isoform GI9	Glyco_hydro_17	6
gene-BC332_19038	1.63704	hypothetical protein	Glyco_hydro_17	6
gene-BC332_01123	-1.0903	Glucan endo-1%2C3-beta-glucosidase 5	Glyco_hydro_17	6
gene-BC332_10319	-1.23409	Glucan endo-1%2C3-beta-glucosidase 5	Glyco_hydro_17	6
novel.7752	2.77738	PF01554:MatE	MatE	6
novel.4326	2.55831	PF01554:MatE	MatE	6
novel.1818	2.37754	PF01554:MatE	MatE	6
novel.9415	1.30705	PF01554:MatE	MatE	6
novel.1543	1.22332	PF01554:MatE	MatE	6
novel.1492	-1.16801	PF01554:MatE	MatE	6
gene-BC332_00346	3.672	hypothetical protein	Thaumatin	6
gene-BC332_05969	2.17473	hypothetical protein	Thaumatin	6
gene-BC332_09363	1.73761	Pathogenesis-related protein 5	Thaumatin	6
gene-BC332_22709	1.1906	Thaumatin-like protein 1	Thaumatin	6
novel.3537	-1.27502	PF00314:Thaumatin family	Thaumatin	6
gene-BC332_16859	-2.19889	Pathogenesis-related protein 5	Thaumatin	6
gene-BC332_28618	4.08832	putative trans-2-enoyl-CoA reductase%2C mitochondrial	ADH_zinc_N	5
gene-BC332_15737	3.55444	Alcohol dehydrogenase 2	ADH_zinc_N	5
gene-BC332_28619	2.47981	putative trans-2-enoyl-CoA reductase%2C mitochondrial	ADH_zinc_N	5
gene-BC332_28620	2.32043	putative trans-2-enoyl-CoA reductase%2C mitochondrial	ADH_zinc_N	5
gene-BC332_24133	2.24106	2-alkenal reductase (NADP(+)-dependent)	ADH_zinc_N	5
gene-BC332_06043	2.66407	hypothetical protein	Aldose_epim	5
novel.2033	1.58981	PF01263:Aldose 1-epimerase	Aldose_epim	5
gene-BC332_08885	-1.00055	hypothetical protein	Aldose_epim	5
gene-BC332_06046	-1.13515	hypothetical protein	Aldose_epim	5
gene-BC332_03915	-1.26891	putative glucose-6-phosphate 1-epimerase	Aldose_epim	5
gene-BC332_01363	1.14451	hypothetical protein	Asp	5
gene-BC332_03404	-1.03181	Aspartic proteinase A2	Asp	5
gene-BC332_05112	-1.32085	Aspartic proteinase A1	Asp	5
gene-BC332_24246	-1.87805	hypothetical protein	Asp	5
gene-BC332_10071	-2.79485	Aspartic proteinase A1	Asp	5
gene-BC332_29507	2.30139	Auxin-responsive protein SAUR65	Auxin_inducible	5
gene-BC332_22507	1.65503	hypothetical protein	Auxin_inducible	5
gene-BC332_26290	1.36791	hypothetical protein	Auxin_inducible	5
gene-BC332_25121	-1.4009	Auxin-responsive protein SAUR15	Auxin_inducible	5
gene-BC332_16834	-1.57909	hypothetical protein	Auxin_inducible	5
gene-BC332_23509	2.77961	putative glutathione S-transferase	GST_C	5
gene-BC332_23179	2.74158	putative glutathione S-transferase	GST_C	5
gene-BC332_28013	2.03744	Glutathione S-transferase U16	GST_C	5
gene-BC332_23180	1.9519	putative glutathione S-transferase	GST_C	5
gene-BC332_23497	1.05742	putative glutathione S-transferase	GST_C	5
gene-BC332_00921	3.26555	hypothetical protein	HMA	5
gene-BC332_08126	1.47171	hypothetical protein	HMA	5
gene-BC332_08436	1.25307	hypothetical protein	HMA	5
gene-BC332_08508	1.22783	hypothetical protein	HMA	5
gene-BC332_02080	-2.4357	hypothetical protein	HMA	5
gene-BC332_12284	3.19242	Kinesin KP1	Kinesin	5
gene-BC332_01894	2.01753	Phragmoplast orienting kinesin-1	Kinesin	5
gene-BC332_12285	1.75324	Kinesin KP1	Kinesin	5
gene-BC332_08992	1.07779	hypothetical protein	Kinesin	5
gene-BC332_05598	-2.46035	hypothetical protein	Kinesin	5
gene-BC332_27357	1.97197	Transcription factor TCP1	TCP	5
gene-BC332_13492	1.58553	Transcription factor TCP12	TCP	5
gene-BC332_00429	-1.00445	hypothetical protein	TCP	5
gene-BC332_16619	-1.38637	Transcription factor TCP17	TCP	5
gene-BC332_16555	-1.99301	Transcription factor TCP12	TCP	5
gene-BC332_15819	1.7624	hypothetical protein	Usp	5
gene-BC332_23851	1.14319	hypothetical protein	Usp	5
gene-BC332_12511	-1.13378	hypothetical protein	Usp	5
gene-BC332_09049	-1.70593	hypothetical protein	Usp	5
gene-BC332_19159	-3.10603	hypothetical protein	Usp	5
gene-BC332_12210	3.61762	Lysine histidine transporter-like 8	Aa_trans	4
gene-BC332_12016	1.11989	Lysine histidine transporter-like 8	Aa_trans	4
gene-BC332_28985	1.02259	Lysine histidine transporter-like 1	Aa_trans	4
gene-BC332_15730	-1.21416	Amino acid permease 5	Aa_trans	4
gene-BC332_20216	1.48293	hypothetical protein	Abhydrolase_1	4
gene-BC332_00033	1.36293	hypothetical protein	Abhydrolase_1	4
gene-BC332_16446	-1.00935	hypothetical protein	Abhydrolase_1	4
gene-BC332_21767	-1.03589	Acyltransferase-like protein%2C chloroplastic	Abhydrolase_1	4
gene-BC332_19626	2.43137	Epidermis-specific secreted glycoprotein EP1	B_lectin	4
gene-BC332_20050	2.39795	hypothetical protein	B_lectin	4
gene-BC332_19472	2.31531	hypothetical protein	B_lectin	4
gene-BC332_19625	1.44223	Epidermis-specific secreted glycoprotein EP1	B_lectin	4
gene-BC332_32587	2.07508	Formin-like protein 4	FH2	4
gene-BC332_07379	1.29637	Formin-like protein 1	FH2	4
gene-BC332_27962	1.03044	Formin-like protein 7	FH2	4
gene-BC332_20841	-1.53893	Formin-like protein 1	FH2	4
gene-BC332_04433	2.21451	Phospholipase A1-II 1	Lipase_3	4
gene-BC332_14735	2.03285	hypothetical protein	Lipase_3	4
gene-BC332_04590	-1.21966	Phospholipase A1-II 1	Lipase_3	4
gene-BC332_04587	-1.41874	Phospholipase A1-II 1	Lipase_3	4
gene-BC332_22757	5.55324	putative purple acid phosphatase 20	Metallophos	4
gene-BC332_18786	1.39162	putative inactive purple acid phosphatase 1	Metallophos	4
gene-BC332_22555	1.28714	Purple acid phosphatase 10	Metallophos	4
gene-BC332_06778	-1.02199	Serine/threonine-protein phosphatase PP1	Metallophos	4
gene-BC332_31146	1.77559	Xylem cysteine proteinase 1	Peptidase_C1	4
gene-BC332_10240	1.16014	Senescence-specific cysteine protease SAG39	Peptidase_C1	4
gene-BC332_22313	-1.53454	Cysteine proteinase RD21a	Peptidase_C1	4
gene-BC332_04048	-2.22403	hypothetical protein	Peptidase_C1	4
gene-BC332_25493	4.03193	Squamosa promoter-binding-like protein 10	SBP	4
gene-BC332_03130	3.25477	Squamosa promoter-binding-like protein 10	SBP	4
gene-BC332_09051	1.04278	Squamosa promoter-binding-like protein 3	SBP	4
gene-BC332_04553	-1.39568	Squamosa promoter-binding protein 1	SBP	4
gene-BC332_22213	3.32575	Pathogenesis-related protein 1C	SCP	4
gene-BC332_22219	2.08429	Basic form of pathogenesis-related protein 1	SCP	4
gene-BC332_17977	1.42483	Pathogenesis-related protein PR-1	SCP	4
novel.6291	-1.01048	PF00188:Cysteine-rich secretory protein family	SCP	4
gene-BC332_07024	1.10609	Sugar transport protein 13	Sugar_tr	4
gene-BC332_07300	-1.22011	Sugar transporter ERD6-like 16	Sugar_tr	4
gene-BC332_20061	-1.82341	Organic cation/carnitine transporter 4	Sugar_tr	4
gene-BC332_24383	-2.11528	Organic cation/carnitine transporter 2	Sugar_tr	4
gene-BC332_04555	1.9591	Dof zinc finger protein PBF	zf-Dof	4
gene-BC332_33095	1.24414	hypothetical protein	zf-Dof	4
gene-BC332_25938	-1.02836	Dof zinc finger protein DOF3.6	zf-Dof	4
gene-BC332_08866	-1.92896	Dof zinc finger protein DOF4.6	zf-Dof	4
novel.5873	1.705	PF00005:ABC transporter	ABC_tran	3
novel.5368	1.19356	PF00005:ABC transporter	ABC_tran	3
gene-BC332_02752	-1.52412	ABC transporter C family member 4	ABC_tran	3
gene-BC332_28212	-1.04614	putative alanine aminotransferase%2C mitochondrial	Aminotran_1_2	3
gene-BC332_00393	-1.31598	putative aminotransferase ACS10	Aminotran_1_2	3
gene-BC332_19318	-1.7788	putative aminotransferase TAT2	Aminotran_1_2	3
gene-BC332_05633	1.34016	hypothetical protein	bZIP_1	3
gene-BC332_22497	-1.16761	hypothetical protein	bZIP_1	3
gene-BC332_11416	-1.49855	Transcription factor TGA7	bZIP_1	3
gene-BC332_24682	2.59985	Nuclear transcription factor Y subunit A-6	CBFB_NFYA	3
gene-BC332_26798	2.56397	Nuclear transcription factor Y subunit A-7	CBFB_NFYA	3
gene-BC332_32013	1.26459	Nuclear transcription factor Y subunit A-4	CBFB_NFYA	3
gene-BC332_31231	2.1418	Chalcone synthase 2	Chal_sti_synt_N	3
gene-BC332_22579	2.08218	Chalcone synthase F	Chal_sti_synt_N	3
gene-BC332_13973	1.48028	Chalcone synthase 2	Chal_sti_synt_N	3
gene-BC332_21201	1.3765	hypothetical protein	Cu_bind_like	3
gene-BC332_05990	1.35299	hypothetical protein	Cu_bind_like	3
gene-BC332_18336	1.23904	hypothetical protein	Cu_bind_like	3
gene-BC332_12121	1.22308	Chaperone protein DnaJ	DnaJ	3
gene-BC332_19814	1.05346	hypothetical protein	DnaJ	3
gene-BC332_30713	-1.0682	hypothetical protein	DnaJ	3
gene-BC332_30297	-1.38091	hypothetical protein	DUF6	3
gene-BC332_26703	-2.02678	WAT1-related protein	DUF6	3
gene-BC332_18053	-2.707	hypothetical protein	DUF6	3
gene-BC332_12978	2.02481	Tetraketide alpha-pyrone reductase 1	Epimerase	3
gene-BC332_27637	1.89227	Cinnamoyl-CoA reductase 2	Epimerase	3
gene-BC332_02570	1.48617	hypothetical protein	Epimerase	3
gene-BC332_32093	6.00663	Respiratory burst oxidase -like protein B	FAD_binding_8	3
gene-BC332_08260	2.2471	Ferric reduction oxidase 5	FAD_binding_8	3
gene-BC332_33427	1.78453	Respiratory burst oxidase -like protein A	FAD_binding_8	3
gene-BC332_14542	5.12134	putative galacturonosyltransferase-like 9	Glyco_transf_8	3
gene-BC332_03714	2.44987	putative galacturonosyltransferase-like 1	Glyco_transf_8	3
gene-BC332_27973	-1.91643	putative galacturonosyltransferase-like 8	Glyco_transf_8	3
gene-BC332_24103	2.04239	Glutathione S-transferase U25	GST_N	3
gene-BC332_19761	1.33184	putative glutathione S-transferase parC	GST_N	3
gene-BC332_23495	1.26296	putative glutathione S-transferase	GST_N	3
gene-BC332_04595	2.33133	WUSCHEL-related homeobox 7	Homeobox	3
gene-BC332_11928	1.30465	WUSCHEL-related homeobox 4	Homeobox	3
gene-BC332_24973	-2.08645	Homeobox-leucine zipper protein HOX6	Homeobox	3
gene-BC332_31051	1.17605	Two pore calcium channel protein 1B	Ion_trans	3
gene-BC332_20017	-1.14339	Cyclic nucleotide-gated ion channel 4	Ion_trans	3
gene-BC332_05902	-2.46712	putative cyclic nucleotide-gated ion channel 16	Ion_trans	3
gene-BC332_09517	2.00853	hypothetical protein	Kelch_1	3
gene-BC332_09518	1.61769	hypothetical protein	Kelch_1	3
gene-BC332_16317	-1.06428	hypothetical protein	Kelch_1	3
novel.7648	1.34001	PF00305:Lipoxygenase|PF01477:PLAT/LH2 domain	Lipoxygenase	3
gene-BC332_22009	1.12427	putative linoleate 9S-lipoxygenase 5	Lipoxygenase	3
gene-BC332_01606	1.0807	Linoleate 13S-lipoxygenase 2-1%2C chloroplastic	Lipoxygenase	3
gene-BC332_23224	4.0694	hypothetical protein	NAD_binding_4	3
gene-BC332_23222	3.5063	hypothetical protein	NAD_binding_4	3
novel.8130	1.57388	PF07993:Male sterility protein|PF03015:Male sterility protein	NAD_binding_4	3
gene-BC332_05196	3.23171	Protein trichome birefringence-like 34	RVT_2	3
gene-BC332_20436	1.45971	hypothetical protein	RVT_2	3
novel.6920	-5.24944	PF07727:Reverse transcriptase (RNA-dependent DNA polymerase)	RVT_2	3
gene-BC332_31266	3.70093	TMV resistance protein N	TIR	3
gene-BC332_31070	1.18491	hypothetical protein	TIR	3
gene-BC332_19169	-1.30559	hypothetical protein	TIR	3
gene-BC332_10132	2.11312	ABC transporter B family member 12	ABC_membrane	2
gene-BC332_06037	1.00492	ABC transporter B family member 1	ABC_membrane	2
gene-BC332_04162	1.30863	hypothetical protein	Abhydrolase_3	2
gene-BC332_07113	-2.59119	hypothetical protein	Abhydrolase_3	2
gene-BC332_28017	3.17861	putative acyl-activating enzyme 2	AMP-binding	2
gene-BC332_05190	3.02751	putative acyl-activating enzyme 2	AMP-binding	2
gene-BC332_14871	1.65679	hypothetical protein	B3	2
gene-BC332_17759	1.29373	hypothetical protein	B3	2
gene-BC332_02782	1.5846	hypothetical protein	C1_3	2
gene-BC332_02789	1.29042	hypothetical protein	C1_3	2
gene-BC332_20167	5.45185	hypothetical protein	CCT	2
gene-BC332_08429	-2.85342	Zinc finger protein CONSTANS-LIKE 5	CCT	2
gene-BC332_19740	1.86195	hypothetical protein	Cytochrom_B561	2
gene-BC332_31882	-1.95929	putative transmembrane ascorbate ferrireductase 3	Cytochrom_B561	2
gene-BC332_17544	1.41211	hypothetical protein	DUF295	2
gene-BC332_17026	1.0375	hypothetical protein	DUF295	2
gene-BC332_09209	2.08092	Plasma membrane ATPase	E1-E2_ATPase	2
gene-BC332_13178	1.41797	putative phospholipid-transporting ATPase 11	E1-E2_ATPase	2
gene-BC332_26975	1.71177	F-box protein	F-box	2
gene-BC332_29595	-3.09958	hypothetical protein	F-box	2
gene-BC332_06437	-1.24335	putative sucrose-phosphate synthase 1	Glycos_transf_1	2
gene-BC332_08396	-1.54561	Soluble starch synthase 1%2C chloroplastic/amyloplastic	Glycos_transf_1	2
gene-BC332_18484	-1.10745	hypothetical protein	Glyoxalase	2
gene-BC332_24320	-1.59282	hypothetical protein	Glyoxalase	2
gene-BC332_12868	2.76427	GEM-like protein 6	GRAM	2
gene-BC332_12864	2.08966	GEM-like protein 6	GRAM	2
gene-BC332_23345	-1.01014	Scarecrow-like protein 9	GRAS	2
gene-BC332_31573	-1.58578	Scarecrow-like protein 3	GRAS	2
gene-BC332_07209	2.37106	Heat stress transcription factor A-2b	HSF_DNA-bind	2
gene-BC332_26792	1.60786	Heat stress transcription factor B-3	HSF_DNA-bind	2
gene-BC332_05903	-1.14364	Potassium transporter 10	K_trans	2
novel.2012	-1.37388	PF02705:K+ potassium transporter	K_trans	2
gene-BC332_00213	2.10779	3-oxoacyl-[acyl-carrier-protein] synthase I%2C chloroplastic	ketoacyl-synt	2
gene-BC332_00215	1.64915	3-oxoacyl-[acyl-carrier-protein] synthase I%2C chloroplastic	ketoacyl-synt	2
gene-BC332_26640	2.13831	Cycloartenol-C-24-methyltransferase 1	Methyltransf_11	2
gene-BC332_09360	1.18297	Phosphoethanolamine N-methyltransferase 1	Methyltransf_11	2
gene-BC332_14344	2.76676	hypothetical protein	MFS_1	2
gene-BC332_31905	-1.05397	putative glycerol-3-phosphate transporter 4	MFS_1	2
gene-BC332_00180	3.1296	Cation/H(+) antiporter 19	Na_H_Exchanger	2
gene-BC332_12349	1.82589	Sodium/hydrogen exchanger 8	Na_H_Exchanger	2
gene-BC332_11708	1.65188	Oligopeptide transporter 6	OPT	2
gene-BC332_05038	1.44228	putative metal-nicotianamine transporter YSL10	OPT	2
gene-BC332_22889	-1.08806	hypothetical protein	Peptidase_S28	2
gene-BC332_29021	-1.49607	hypothetical protein	Peptidase_S28	2
gene-BC332_15069	1.25665	Protein argonaute 10	Piwi	2
gene-BC332_24444	-1.1624	Protein argonaute 1A	Piwi	2
gene-BC332_03120	1.6203	Carotenoid cleavage dioxygenase 7%2C chloroplastic	RPE65	2
gene-BC332_19718	-1.22741	hypothetical protein	RPE65	2
gene-BC332_09465	1.3591	Homeobox-leucine zipper protein HOX32	START	2
gene-BC332_04171	1.08403	Homeobox-leucine zipper protein HOX32	START	2
gene-BC332_27499	2.46209	hypothetical protein	Sulfotransfer_1	2
novel.1803	-2.40371	PF00685:Sulfotransferase domain	Sulfotransfer_1	2
gene-BC332_27920	1.79048	HVA22-like protein c	TB2_DP1_HVA22	2
gene-BC332_08512	-1.72055	HVA22-like protein d	TB2_DP1_HVA22	2
gene-BC332_25888	1.18926	Pyruvate decarboxylase 2	TPP_enzyme_N	2
gene-BC332_04616	1.01241	Pyruvate decarboxylase 1	TPP_enzyme_N	2
gene-BC332_32246	4.30775	Zinc-finger homeodomain protein 6	ZF-HD_dimer	2
gene-BC332_08548	-1.41489	hypothetical protein	ZF-HD_dimer	2
gene-BC332_24719	1.25157	hypothetical protein	Zim	2
gene-BC332_16544	-1.81755	hypothetical protein	Zim	2
gene-BC332_21370	1.05698	Glyoxysomal fatty acid beta-oxidation multifunctional protein MFP-a	3HCDH_N	1
gene-BC332_02193	-1.22078	Bifunctional aspartokinase/homoserine dehydrogenase 1%2C chloroplastic	AA_kinase	1
gene-BC332_16423	-1.2422	hypothetical protein	Abhydrolase_2	1
gene-BC332_18067	-1.30374	hypothetical protein	Acetyltransf_1	1
gene-BC332_14201	1.2289	actin	Actin	1
gene-BC332_29650	1.69235	putative mannitol dehydrogenase	ADH_N	1
novel.627	-1.39044	PF00406:Adenylate kinase	ADK	1
gene-BC332_29341	-1.91479	hypothetical protein	Agenet	1
gene-BC332_28070	2.13656	Aldehyde dehydrogenase%2C mitochondrial	Aldedh	1
gene-BC332_21861	-1.79364	putative aldo-keto reductase 2	Aldo_ket_red	1
gene-BC332_07363	1.94261	Ammonium transporter 3 member 1	Ammonium_transp	1
gene-BC332_25829	1.18336	Ammonium transporter 2 member 2	Ammonium_transp	1
gene-BC332_16197	1.47246	hypothetical protein	ANF_receptor	1
gene-BC332_00974	5.1504	Ubiquinol oxidase 3%2C mitochondrial	AOX	1
gene-BC332_11904	1.91206	Isoaspartyl peptidase/L-asparaginase	Asparaginase_2	1
gene-BC332_15449	1.26995	putative low-specificity L-threonine aldolase 1	Beta_elim_lyase	1
gene-BC332_20385	1.49609	hypothetical protein	C2	1
gene-BC332_23147	2.70193	S-type anion channel SLAH3	C4dic_mal_tran	1
novel.12577	1.22097	PF04857:CAF1 family ribonuclease	CAF1	1
gene-BC332_32249	-1.40684	hypothetical protein	CBS	1
gene-BC332_31338	1.59993	hypothetical protein	ChaC	1
gene-BC332_29718	1.60492	Cyclin-D4-1	Cyclin_C	1
gene-BC332_17504	1.9195	hypothetical protein	DENN	1
gene-BC332_04470	1.37032	DNA polymerase alpha catalytic subunit	DNA_pol_B_exo	1
gene-BC332_03113	-1.33647	hypothetical protein	DnaJ_C	1
gene-BC332_32498	-4.24929	Vacuolar iron transporter -like protein 4	DUF125	1
gene-BC332_19742	-1.19729	Callose synthase 3	DUF605	1
gene-BC332_23298	-1.5263	Transcription factor-like protein DPA	E2F_TDP	1
gene-BC332_03242	2.38711	hypothetical protein	efhand	1
novel.3134	-1.09796	PF03372:Endonuclease/Exonuclease/phosphatase family	Exo_endo_phos	1
novel.2020	-2.56915	PF03372:Endonuclease/Exonuclease/phosphatase family	Exo_endo_phos	1
gene-BC332_09076	1.23688	hypothetical protein	Exo70	1
gene-BC332_28715	1.36432	hypothetical protein	Glyco_hydro_3	1
gene-BC332_01373	-1.44651	hypothetical protein	GSHPx	1
gene-BC332_34485	1.08302	Elongation factor Tu	GTP_EFTU	1
gene-BC332_12158	-1.09029	GDSL esterase/lipase EXL1	hATC	1
gene-BC332_02331	1.85908	DNA topoisomerase 2	HATPase_c	1
gene-BC332_10301	1.46861	hypothetical protein	HSP70	1
gene-BC332_06740	-2.16427	Adenylate isopentenyltransferase 3%2C chloroplastic	IPPT	1
gene-BC332_16575	1.04481	Agamous-like MADS-box protein AGL8 -like protein	K-box	1
gene-BC332_24714	3.25702	Sm-like protein LSM1B	LSM	1
gene-BC332_10865	1.10237	LysM domain-containing GPI-anchored protein 2	LysM	1
gene-BC332_05353	-1.69138	hypothetical protein	Maf	1
gene-BC332_12980	-1.00539	hypothetical protein	MATH	1
gene-BC332_22247	1.45244	hypothetical protein	Mpv17_PMP22	1
gene-BC332_23390	-1.51765	Vacuolar cation/proton exchanger 3	Na_Ca_ex	1
gene-BC332_20344	-1.11695	Nucleoside diphosphate kinase 4%2C chloroplastic	NDK	1
gene-BC332_00900	1.15252	Bifunctional pinoresinol-lariciresinol reductase	NmrA	1
gene-BC332_00626	2.08161	Nudix hydrolase 8	NUDIX	1
gene-BC332_21785	1.1263	Cysteine synthase	PALP	1
gene-BC332_14612	-1.05036	hypothetical protein	PD40	1
gene-BC332_13790	-1.45983	Metacaspase-1	Peptidase_C14	1
gene-BC332_28025	1.06329	IAA-amino acid hydrolase ILR1-like 1	Peptidase_M20	1
gene-BC332_12318	-1.32393	putative protein phosphatase 2C 22	PP2C	1
gene-BC332_17493	1.74198	Adenine phosphoribosyltransferase 4	Pribosyltran	1
gene-BC332_01918	2.49202	Pumilio -like protein 11	PUF	1
gene-BC332_32693	-1.0174	hypothetical protein	Rhomboid	1
gene-BC332_04093	-1.15518	putative ribose-5-phosphate isomerase 4%2C chloroplastic	Rib_5-P_isom_A	1
gene-BC332_17883	2.35448	hypothetical protein	Ribonuclease_T2	1
novel.1828	5.75019	PF00076:RNA recognition motif. (a.k.a. RRM, RBD, or RNP domain)	RRM_1	1
novel.3821	1.01693	PF00078:Reverse transcriptase (RNA-dependent DNA polymerase)|PF04970:Lecithin retinol acyltransferase	RVT_1	1
gene-BC332_32047	1.27234	hypothetical protein	RWP-RK	1
gene-BC332_07868	1.19447	Structural maintenance of chromosomes protein 2-1	SMC_N	1
gene-BC332_16847	-2.6853	hypothetical protein	SNARE	1
gene-BC332_04358	1.98503	Floral homeotic protein AGAMOUS	SRF-TF	1
gene-BC332_12741	1.98111	GRF1-interacting factor 1	SSXT	1
gene-BC332_17659	1.0949	Sulfate transporter 3.1	Sulfate_transp	1
gene-BC332_23967	-1.34934	Asparagine--tRNA ligase%2C cytoplasmic 2	tRNA-synt_2	1
gene-BC332_08119	-1.09528	Tubulin beta-2 chain	Tubulin	1
gene-BC332_27254	3.29946	hypothetical protein	U-box	1
gene-BC332_10499	-1.25205	hypothetical protein	UQ_con	1
gene-BC332_06384	5.31263	hypothetical protein	WW	1
gene-BC332_24789	-2.45724	Protein YABBY 6	YABBY	1
gene-BC332_29983	-1.17021	hypothetical protein	zf-A20	1
gene-BC332_04855	-2.25173	Zinc finger protein CONSTANS-LIKE 13	zf-B_box	1
gene-BC332_26130	1.25667	BTB/POZ and TAZ domain-containing protein 1	zf-TAZ	1
gene-BC332_28765	1.20817	Indole-3-acetaldehyde oxidase	Fer2
gene-BC332_33285	-1.09211	Ferredoxin-1%2C chloroplastic	Fer2
gene-BC332_11734	-1.01964	hypothetical protein	FGGY_N
gene-BC332_09567	1.41473	Peroxisomal (S)-2-hydroxy-acid oxidase GLO3	FMN_dh
gene-BC332_00699	1.19795	hypothetical protein	FMO-like
gene-BC332_14668	-1.44004	putative indole-3-pyruvate monooxygenase YUCCA8	FMO-like
gene-BC332_03133	-1.43661	GATA transcription factor 2	GATA
gene-BC332_11377	-1.26912	hypothetical protein	GFO_IDH_MocA

## Sheet: CCa6vsCCa3
Supplementary Table S8. Information of DEG encoding transcription factor
Gene_id	Log2FoldChange	Gene_description	TF_family	Number
gene-BC332_33265	5.89066	hypothetical protein	Pkinase	87
novel.6337	-6.3615	PF13855:Leucine rich repeat|PF08263:Leucine rich repeat N-terminal domain|PF00069:Protein kinase domain	Pkinase	87
gene-BC332_11322	-2.43658	hypothetical protein	Pkinase	87
novel.9413	-1.75452	PF00069:Protein kinase domain	Pkinase	87
gene-BC332_11186	-1.50953	LRR receptor-like serine/threonine-protein kinase RCH1	Pkinase	87
gene-BC332_19855	-1.33859	putative L-type lectin-domain containing receptor kinase S.7	Pkinase	87
gene-BC332_23062	-1.32588	Serine/threonine-protein kinase-like protein CCR1	Pkinase	87
gene-BC332_06090	-1.25791	Serine/threonine-protein kinase D6PKL3	Pkinase	87
novel.8899	-1.22425	PF00069:Protein kinase domain	Pkinase	87
gene-BC332_19561	-1.21598	hypothetical protein	Pkinase	87
gene-BC332_07032	-1.19048	putative serine/threonine-protein kinase WNK1	Pkinase	87
gene-BC332_14896	-1.1494	Protein NSP-INTERACTING KINASE 1	Pkinase	87
gene-BC332_28616	-1.14432	Mitogen-activated protein kinase -like protein NTF6	Pkinase	87
gene-BC332_05448	-1.12222	putative LRR receptor-like serine/threonine-protein kinase	Pkinase	87
gene-BC332_13892	-1.10244	putative serine/threonine-protein kinase-like protein CCR3	Pkinase	87
gene-BC332_10522	-1.0748	putative LRR receptor-like serine/threonine-protein kinase	Pkinase	87
gene-BC332_14728	-1.03437	hypothetical protein	Pkinase	87
gene-BC332_03052	1.11391	putative receptor-like protein kinase	Pkinase	87
gene-BC332_11731	1.16727	hypothetical protein	Pkinase	87
gene-BC332_31838	1.16871	Cysteine-rich receptor-like protein kinase 2	Pkinase	87
gene-BC332_19746	1.22812	hypothetical protein	Pkinase	87
gene-BC332_17450	1.24425	CBL-interacting serine/threonine-protein kinase 14	Pkinase	87
gene-BC332_18001	1.24601	hypothetical protein	Pkinase	87
gene-BC332_26129	1.29632	Leucine-rich repeat receptor-like serine/threonine/tyrosine-protein kinase SOBIR1	Pkinase	87
novel.3372	1.31067	PF00069:Protein kinase domain|PF13855:Leucine rich repeat|PF08263:Leucine rich repeat N-terminal domain	Pkinase	87
gene-BC332_15311	1.35977	Mitogen-activated protein kinase -like protein NTF4	Pkinase	87
gene-BC332_17724	1.39183	Leucine-rich repeat receptor-like serine/threonine/tyrosine-protein kinase SOBIR1	Pkinase	87
gene-BC332_33147	1.41991	hypothetical protein	Pkinase	87
gene-BC332_27221	1.43974	hypothetical protein	Pkinase	87
gene-BC332_14919	1.45459	hypothetical protein	Pkinase	87
gene-BC332_31837	1.52688	hypothetical protein	Pkinase	87
gene-BC332_25057	1.55336	hypothetical protein	Pkinase	87
gene-BC332_33164	1.55829	hypothetical protein	Pkinase	87
gene-BC332_12468	1.60676	hypothetical protein	Pkinase	87
gene-BC332_11494	1.62056	hypothetical protein	Pkinase	87
gene-BC332_30175	1.62593	putative serine/threonine-protein kinase	Pkinase	87
gene-BC332_10256	1.63141	hypothetical protein	Pkinase	87
gene-BC332_12169	1.66101	Calcium-dependent protein kinase 9	Pkinase	87
gene-BC332_33253	1.69889	putative receptor-like protein kinase	Pkinase	87
gene-BC332_24620	1.70634	hypothetical protein	Pkinase	87
gene-BC332_01562	1.72773	hypothetical protein	Pkinase	87
novel.3810	1.75353	PF13855:Leucine rich repeat|PF00069:Protein kinase domain|PF08263:Leucine rich repeat N-terminal domain	Pkinase	87
gene-BC332_05047	1.75398	hypothetical protein	Pkinase	87
gene-BC332_24599	1.75528	hypothetical protein	Pkinase	87
novel.3804	1.7885	PF13855:Leucine rich repeat|PF00069:Protein kinase domain	Pkinase	87
gene-BC332_13739	1.81762	hypothetical protein	Pkinase	87
gene-BC332_08092	1.83086	hypothetical protein	Pkinase	87
gene-BC332_27228	1.83416	putative serine/threonine-protein kinase	Pkinase	87
novel.3320	1.84887	PF13855:Leucine rich repeat|PF00069:Protein kinase domain|PF08263:Leucine rich repeat N-terminal domain	Pkinase	87
gene-BC332_18186	1.88901	hypothetical protein	Pkinase	87
gene-BC332_26516	2.00171	hypothetical protein	Pkinase	87
novel.6319	2.03254	PF00069:Protein kinase domain|PF08263:Leucine rich repeat N-terminal domain|PF13855:Leucine rich repeat	Pkinase	87
gene-BC332_23566	2.13405	Calcium-dependent protein kinase 5	Pkinase	87
gene-BC332_33145	2.14788	hypothetical protein	Pkinase	87
gene-BC332_10350	2.18937	hypothetical protein	Pkinase	87
gene-BC332_27225	2.22167	hypothetical protein	Pkinase	87
gene-BC332_27213	2.25652	putative receptor-like protein kinase	Pkinase	87
gene-BC332_30213	2.30841	hypothetical protein	Pkinase	87
novel.3850	2.31401	PF13855:Leucine rich repeat|PF00069:Protein kinase domain|PF08263:Leucine rich repeat N-terminal domain	Pkinase	87
gene-BC332_10368	2.38421	hypothetical protein	Pkinase	87
novel.8580	2.45409	PF00069:Protein kinase domain	Pkinase	87
gene-BC332_07044	2.48857	hypothetical protein	Pkinase	87
gene-BC332_10353	2.59889	hypothetical protein	Pkinase	87
novel.3858	2.60983	PF13855:Leucine rich repeat|PF00069:Protein kinase domain	Pkinase	87
novel.3336	2.62284	PF00069:Protein kinase domain|PF13855:Leucine rich repeat	Pkinase	87
gene-BC332_27227	2.65458	hypothetical protein	Pkinase	87
gene-BC332_27226	2.65986	hypothetical protein	Pkinase	87
gene-BC332_23554	2.6886	L-type lectin-domain containing receptor kinase IV.3	Pkinase	87
novel.1318	2.73672	PF00069:Protein kinase domain	Pkinase	87
gene-BC332_24052	2.739	putative L-type lectin-domain containing receptor kinase VI.1	Pkinase	87
gene-BC332_14371	3.0184	Serine/threonine-protein kinase	Pkinase	87
gene-BC332_27209	3.27382	putative receptor-like protein kinase	Pkinase	87
novel.3851	3.30595	PF00069:Protein kinase domain|PF13855:Leucine rich repeat	Pkinase	87
novel.3342	3.48211	PF08263:Leucine rich repeat N-terminal domain|PF13855:Leucine rich repeat|PF00069:Protein kinase domain	Pkinase	87
gene-BC332_26572	3.53882	Cysteine-rich receptor-like protein kinase 25	Pkinase	87
gene-BC332_10370	3.57472	hypothetical protein	Pkinase	87
gene-BC332_12464	3.66165	hypothetical protein	Pkinase	87
gene-BC332_09458	3.84313	hypothetical protein	Pkinase	87
gene-BC332_25684	3.86545	putative LRR receptor-like serine/threonine-protein kinase	Pkinase	87
gene-BC332_20948	3.899	hypothetical protein	Pkinase	87
gene-BC332_07043	3.9284	hypothetical protein	Pkinase	87
novel.3795	4.04453	PF07714:Protein tyrosine kinase|PF00069:Protein kinase domain	Pkinase	87
gene-BC332_09968	4.23348	hypothetical protein	Pkinase	87
gene-BC332_11495	4.3805	putative LRR receptor-like serine/threonine-protein kinase	Pkinase	87
gene-BC332_10366	5.30931	hypothetical protein	Pkinase	87
novel.3321	5.38599	PF00069:Protein kinase domain	Pkinase	87
gene-BC332_10369	5.44497	hypothetical protein	Pkinase	87
gene-BC332_00776	-4.82894	hypothetical protein	p450	48
gene-BC332_25061	-1.86236	9-divinyl ether synthase	p450	48
gene-BC332_19735	-1.56334	CytochromeB1	p450	48
gene-BC332_19620	-1.55648	Cytochrome	p450	48
gene-BC332_03690	-1.40458	Geraniol 8-hydroxylase	p450	48
gene-BC332_30316	-1.29099	Cytochrome	p450	48
gene-BC332_21439	-1.22385	Cytochrome 86A4	p450	48
gene-BC332_25348	-1.17024	Cytochrome	p450	48
gene-BC332_24456	-1.15701	CytochromeA4	p450	48
gene-BC332_26401	-1.10398	Protein LUTEIN DEFICIENT 5%2C chloroplastic	p450	48
gene-BC332_11883	1.01473	hypothetical protein	p450	48
gene-BC332_15778	1.14069	Cytochrome 71D7	p450	48
gene-BC332_15922	1.15854	hypothetical protein	p450	48
gene-BC332_08484	1.20252	Cytochrome 89A9	p450	48
gene-BC332_13778	1.26309	hypothetical protein	p450	48
gene-BC332_05436	1.31716	Cytochrome 84A1	p450	48
gene-BC332_11890	1.32487	hypothetical protein	p450	48
gene-BC332_08485	1.41231	Cytochrome 89A9	p450	48
gene-BC332_01734	1.41694	Premnaspirodiene oxygenase	p450	48
gene-BC332_12646	1.50376	Cytochrome	p450	48
gene-BC332_31479	1.5079	hypothetical protein	p450	48
novel.6685	1.51972	PF00067:Cytochrome P450	p450	48
gene-BC332_09551	1.54181	hypothetical protein	p450	48
gene-BC332_04980	1.83852	Cytochrome 71D7	p450	48
gene-BC332_31607	1.95969	hypothetical protein	p450	48
gene-BC332_09552	1.9828	hypothetical protein	p450	48
gene-BC332_09060	2.01162	Cytochrome 78A5	p450	48
gene-BC332_16922	2.14945	Cytochrome 82C3	p450	48
gene-BC332_12647	2.32113	Cytochrome	p450	48
gene-BC332_06432	2.4241	hypothetical protein	p450	48
gene-BC332_19512	2.43939	Cytochrome	p450	48
gene-BC332_30314	2.45038	hypothetical protein	p450	48
gene-BC332_11881	2.91587	hypothetical protein	p450	48
gene-BC332_09341	3.07099	5-epiaristolochene 1%2C3-dihydroxylase	p450	48
gene-BC332_22843	3.15203	hypothetical protein	p450	48
gene-BC332_29022	3.28881	Flavonoid 3'%2C5'-hydroxylase	p450	48
gene-BC332_19514	3.31877	Cytochrome	p450	48
gene-BC332_30249	3.3685	hypothetical protein	p450	48
gene-BC332_17713	3.56613	Cytochrome 71A2	p450	48
gene-BC332_01349	3.66697	CytochromeB1	p450	48
gene-BC332_03685	3.71071	Geraniol 8-hydroxylase	p450	48
gene-BC332_26580	3.71488	hypothetical protein	p450	48
gene-BC332_12689	3.83076	Cytochrome 89A9	p450	48
gene-BC332_11998	4.09525	hypothetical protein	p450	48
gene-BC332_01340	5.10479	CytochromeC1	p450	48
gene-BC332_03446	5.49767	Cytochrome 86B1	p450	48
gene-BC332_15965	5.66098	Geraniol 8-hydroxylase	p450	48
gene-BC332_17371	7.00623	Cytochrome 86A7	p450	48
gene-BC332_00392	-1.23534	putative LRR receptor-like serine/threonine-protein kinase	Pkinase_Tyr	37
gene-BC332_14226	-1.21891	Receptor-like protein kinase THESEUS 1	Pkinase_Tyr	37
gene-BC332_21938	-1.16808	Serine/threonine-protein kinase	Pkinase_Tyr	37
gene-BC332_15171	-1.0779	putative leucine-rich repeat receptor-like protein kinase IMK3	Pkinase_Tyr	37
gene-BC332_28401	1.00306	Protein kinase APK1B%2C chloroplastic	Pkinase_Tyr	37
gene-BC332_00235	1.05995	hypothetical protein	Pkinase_Tyr	37
gene-BC332_02414	1.08686	putative inactive leucine-rich repeat receptor-like protein kinase	Pkinase_Tyr	37
gene-BC332_10352	1.14043	hypothetical protein	Pkinase_Tyr	37
gene-BC332_05095	1.15379	Chitin elicitor receptor kinase 1	Pkinase_Tyr	37
gene-BC332_11096	1.16265	hypothetical protein	Pkinase_Tyr	37
gene-BC332_04698	1.23015	G-type lectin S-receptor-like serine/threonine-protein kinase	Pkinase_Tyr	37
gene-BC332_03616	1.24794	G-type lectin S-receptor-like serine/threonine-protein kinase	Pkinase_Tyr	37
gene-BC332_20029	1.3661	hypothetical protein	Pkinase_Tyr	37
gene-BC332_20026	1.42288	G-type lectin S-receptor-like serine/threonine-protein kinase	Pkinase_Tyr	37
gene-BC332_19175	1.46802	G-type lectin S-receptor-like serine/threonine-protein kinase	Pkinase_Tyr	37
gene-BC332_18155	1.65387	G-type lectin S-receptor-like serine/threonine-protein kinase	Pkinase_Tyr	37
gene-BC332_21036	1.71512	Receptor-like serine/threonine-protein kinase	Pkinase_Tyr	37
gene-BC332_11482	1.73495	hypothetical protein	Pkinase_Tyr	37
novel.3774	1.7615	PF13855:Leucine rich repeat|PF07714:Protein tyrosine kinase|PF00069:Protein kinase domain	Pkinase_Tyr	37
gene-BC332_10399	1.77702	Cysteine-rich receptor-like protein kinase 25	Pkinase_Tyr	37
gene-BC332_04914	1.8369	hypothetical protein	Pkinase_Tyr	37
gene-BC332_11780	1.85826	G-type lectin S-receptor-like serine/threonine-protein kinase SD1-1	Pkinase_Tyr	37
gene-BC332_28891	1.94824	G-type lectin S-receptor-like serine/threonine-protein kinase	Pkinase_Tyr	37
gene-BC332_11771	2.04967	hypothetical protein	Pkinase_Tyr	37
gene-BC332_13058	2.21253	G-type lectin S-receptor-like serine/threonine-protein kinase	Pkinase_Tyr	37
gene-BC332_20028	2.2603	hypothetical protein	Pkinase_Tyr	37
gene-BC332_16247	2.31022	Serine/threonine-protein kinase	Pkinase_Tyr	37
gene-BC332_17873	2.36477	hypothetical protein	Pkinase_Tyr	37
gene-BC332_20051	2.49232	Receptor-like serine/threonine-protein kinase SD1-7	Pkinase_Tyr	37
gene-BC332_11772	2.49749	G-type lectin S-receptor-like serine/threonine-protein kinase	Pkinase_Tyr	37
gene-BC332_17867	2.6675	hypothetical protein	Pkinase_Tyr	37
gene-BC332_04912	2.7794	Cysteine-rich receptor-like protein kinase 10	Pkinase_Tyr	37
novel.3307	2.87106	PF13855:Leucine rich repeat|PF07714:Protein tyrosine kinase	Pkinase_Tyr	37
gene-BC332_17895	3.25179	hypothetical protein	Pkinase_Tyr	37
gene-BC332_25208	3.49337	hypothetical protein	Pkinase_Tyr	37
gene-BC332_18122	3.90206	Receptor-like serine/threonine-protein kinase SD1-7	Pkinase_Tyr	37
gene-BC332_27206	4.48343	Glycerophosphodiester phosphodiesterase protein kinase domain-containing GDPDL2	Pkinase_Tyr	37
gene-BC332_14692	-2.53275	hypothetical protein	NB-ARC	28
gene-BC332_14694	-2.00705	hypothetical protein	NB-ARC	28
gene-BC332_27329	-1.50123	hypothetical protein	NB-ARC	28
gene-BC332_33703	-1.23716	hypothetical protein	NB-ARC	28
gene-BC332_18960	1.12425	hypothetical protein	NB-ARC	28
gene-BC332_31254	1.15376	hypothetical protein	NB-ARC	28
gene-BC332_26881	1.1748	hypothetical protein	NB-ARC	28
gene-BC332_24829	1.17516	hypothetical protein	NB-ARC	28
gene-BC332_24814	1.17571	hypothetical protein	NB-ARC	28
gene-BC332_18957	1.21765	hypothetical protein	NB-ARC	28
gene-BC332_26877	1.28518	hypothetical protein	NB-ARC	28
gene-BC332_31895	1.28701	hypothetical protein	NB-ARC	28
gene-BC332_24697	1.29335	hypothetical protein	NB-ARC	28
gene-BC332_14583	1.36892	hypothetical protein	NB-ARC	28
gene-BC332_24703	1.49918	hypothetical protein	NB-ARC	28
gene-BC332_06323	1.5148	hypothetical protein	NB-ARC	28
gene-BC332_18109	1.52228	Eukaryotic translation initiation factor isoform 4G-1	NB-ARC	28
novel.12283	1.59248	PF00931:NB-ARC domain	NB-ARC	28
gene-BC332_06348	1.68992	hypothetical protein	NB-ARC	28
gene-BC332_22020	1.70607	hypothetical protein	NB-ARC	28
gene-BC332_12612	2.28174	hypothetical protein	NB-ARC	28
gene-BC332_16130	2.37146	hypothetical protein	NB-ARC	28
gene-BC332_18395	2.7688	hypothetical protein	NB-ARC	28
gene-BC332_32668	3.02788	hypothetical protein	NB-ARC	28
gene-BC332_31355	3.47691	putative late blight resistance protein -like protein R1B-23	NB-ARC	28
novel.11993	3.57888	PF00931:NB-ARC domain	NB-ARC	28
gene-BC332_14604	3.81093	hypothetical protein	NB-ARC	28
gene-BC332_24701	4.68605	hypothetical protein	NB-ARC	28
gene-BC332_21532	1.08363	putative WRKY transcription factor 27	WRKY	21
gene-BC332_13551	1.09408	putative WRKY transcription factor 41	WRKY	21
gene-BC332_20450	1.12004	putative WRKY transcription factor 7	WRKY	21
gene-BC332_04245	1.22474	putative WRKY transcription factor 71	WRKY	21
gene-BC332_19744	1.29596	putative WRKY transcription factor 8	WRKY	21
gene-BC332_20350	1.407	hypothetical protein	WRKY	21
gene-BC332_34107	1.59956	hypothetical protein	WRKY	21
gene-BC332_21563	1.64355	hypothetical protein	WRKY	21
gene-BC332_24089	1.81927	putative WRKY transcription factor 57	WRKY	21
gene-BC332_14014	2.03904	putative WRKY transcription factor 23	WRKY	21
gene-BC332_30500	2.2003	putative WRKY transcription factor 13	WRKY	21
gene-BC332_11349	3.02197	putative WRKY transcription factor 59	WRKY	21
gene-BC332_03843	3.08285	hypothetical protein	WRKY	21
gene-BC332_25469	3.19664	putative WRKY transcription factor 66	WRKY	21
gene-BC332_26043	3.31762	hypothetical protein	WRKY	21
gene-BC332_33123	3.62279	hypothetical protein	WRKY	21
gene-BC332_07394	3.62597	hypothetical protein	WRKY	21
gene-BC332_32474	3.73003	putative WRKY transcription factor 72	WRKY	21
gene-BC332_21277	4.12082	hypothetical protein	WRKY	21
gene-BC332_30517	4.16963	putative WRKY transcription factor 23	WRKY	21
gene-BC332_21231	5.3397	putative WRKY transcription factor 9	WRKY	21
gene-BC332_01608	-1.96496	hypothetical protein	2OG-FeII_Oxy	20
gene-BC332_06801	-1.84046	1-aminocyclopropane-1-carboxylate oxidase -like protein 3	2OG-FeII_Oxy	20
gene-BC332_28826	-1.77861	Hyoscyamine 6-dioxygenase	2OG-FeII_Oxy	20
gene-BC332_22911	-1.47566	1-aminocyclopropane-1-carboxylate oxidase -like protein 3	2OG-FeII_Oxy	20
gene-BC332_04417	-1.26592	hypothetical protein	2OG-FeII_Oxy	20
gene-BC332_17414	-1.11328	hypothetical protein	2OG-FeII_Oxy	20
gene-BC332_24272	1.15918	1-aminocyclopropane-1-carboxylate oxidase 1	2OG-FeII_Oxy	20
gene-BC332_16411	1.21513	putative 2-oxoglutarate-dependent dioxygenase AOP1	2OG-FeII_Oxy	20
gene-BC332_09783	1.85946	Deacetoxyvindoline 4-hydroxylase	2OG-FeII_Oxy	20
gene-BC332_20712	1.9023	putative 2-oxoglutarate/Fe(II)-dependent dioxygenase	2OG-FeII_Oxy	20
gene-BC332_16399	2.0238	hypothetical protein	2OG-FeII_Oxy	20
gene-BC332_08691	2.15799	hypothetical protein	2OG-FeII_Oxy	20
gene-BC332_06798	2.46201	1-aminocyclopropane-1-carboxylate oxidase -like protein 3	2OG-FeII_Oxy	20
gene-BC332_06816	2.52203	hypothetical protein	2OG-FeII_Oxy	20
gene-BC332_17727	2.53632	hypothetical protein	2OG-FeII_Oxy	20
gene-BC332_16891	3.07349	hypothetical protein	2OG-FeII_Oxy	20
gene-BC332_05284	3.24585	Naringenin%2C2-oxoglutarate 3-dioxygenase	2OG-FeII_Oxy	20
gene-BC332_23039	3.63452	Flavonol synthase/flavanone 3-hydroxylase	2OG-FeII_Oxy	20
gene-BC332_06818	4.37727	1-aminocyclopropane-1-carboxylate oxidase -like protein 7	2OG-FeII_Oxy	20
gene-BC332_16870	4.69574	hypothetical protein	2OG-FeII_Oxy	20
gene-BC332_02255	-2.60619	DNA-damage-repair/toleration protein	LRRNT_2	19
gene-BC332_17795	-1.48208	Polygalacturonase inhibitor	LRRNT_2	19
gene-BC332_26686	1.08102	BRASSINOSTEROID INSENSITIVE 1-associated receptor kinase 1	LRRNT_2	19
gene-BC332_22246	1.16223	Somatic embryogenesis receptor kinase 1	LRRNT_2	19
gene-BC332_18084	1.18096	hypothetical protein	LRRNT_2	19
gene-BC332_32911	1.39524	hypothetical protein	LRRNT_2	19
gene-BC332_14305	1.72009	hypothetical protein	LRRNT_2	19
gene-BC332_32890	1.79438	Crocetin glucosyltransferase%2C chloroplastic	LRRNT_2	19
gene-BC332_21895	1.88479	hypothetical protein	LRRNT_2	19
gene-BC332_20846	1.95618	hypothetical protein	LRRNT_2	19
gene-BC332_02329	2.14498	hypothetical protein	LRRNT_2	19
gene-BC332_05434	2.17581	hypothetical protein	LRRNT_2	19
gene-BC332_34517	2.195	hypothetical protein	LRRNT_2	19
gene-BC332_33052	2.44537	hypothetical protein	LRRNT_2	19
gene-BC332_32036	2.91392	hypothetical protein	LRRNT_2	19
gene-BC332_14184	3.89534	hypothetical protein	LRRNT_2	19
gene-BC332_19268	4.0901	hypothetical protein	LRRNT_2	19
gene-BC332_28736	4.59006	hypothetical protein	LRRNT_2	19
gene-BC332_14294	5.99497	hypothetical protein	LRRNT_2	19
gene-BC332_06008	-1.19576	Transcription factor MYB39	Myb_DNA-binding	15
gene-BC332_27762	1.01184	Myb family transcription factor APL	Myb_DNA-binding	15
gene-BC332_17123	1.10301	Transcription factor MYB59	Myb_DNA-binding	15
gene-BC332_07646	1.16309	Myb family transcription factor APL	Myb_DNA-binding	15
gene-BC332_14907	1.28902	Transcription factor MYB48	Myb_DNA-binding	15
gene-BC332_29469	1.56741	Myb-related protein	Myb_DNA-binding	15
gene-BC332_24399	1.66373	putative Myb family transcription factor	Myb_DNA-binding	15
gene-BC332_10237	1.67773	putative Myb family transcription factor	Myb_DNA-binding	15
gene-BC332_15958	1.74943	Myb family transcription factor APL	Myb_DNA-binding	15
gene-BC332_22966	2.53703	Transcription factor RAX2	Myb_DNA-binding	15
gene-BC332_14002	2.66954	Transcription factor	Myb_DNA-binding	15
gene-BC332_18917	2.85557	putative transcription factor KAN3	Myb_DNA-binding	15
gene-BC332_17980	3.05717	Transcription factor RAX2	Myb_DNA-binding	15
gene-BC332_17052	4.28947	Transcription factor RAX2	Myb_DNA-binding	15
gene-BC332_03169	4.32338	Myb-related protein Myb4	Myb_DNA-binding	15
gene-BC332_17511	-1.76231	GDSL esterase/lipase	Lipase_GDSL	12
gene-BC332_04605	-1.71297	GDSL esterase/lipase	Lipase_GDSL	12
gene-BC332_30059	-1.58411	GDSL esterase/lipase	Lipase_GDSL	12
gene-BC332_04348	-1.39101	hypothetical protein	Lipase_GDSL	12
gene-BC332_09671	-1.37241	GDSL esterase/lipase	Lipase_GDSL	12
gene-BC332_04349	-1.32538	hypothetical protein	Lipase_GDSL	12
gene-BC332_19047	-1.27471	GDSL esterase/lipase	Lipase_GDSL	12
gene-BC332_10244	-1.13364	GDSL esterase/lipase	Lipase_GDSL	12
gene-BC332_28443	1.02529	hypothetical protein	Lipase_GDSL	12
gene-BC332_26133	1.50191	GDSL esterase/lipase CPRD49	Lipase_GDSL	12
gene-BC332_25201	5.66269	GDSL esterase/lipase	Lipase_GDSL	12
gene-BC332_29474	6.4008	GDSL esterase/lipase	Lipase_GDSL	12
gene-BC332_00402	-2.24542	hypothetical protein	Peptidase_S8	11
gene-BC332_02548	-2.21207	hypothetical protein	Peptidase_S8	11
gene-BC332_08022	-1.57566	Subtilisin-like protease SBT1.7	Peptidase_S8	11
gene-BC332_00401	-1.16408	hypothetical protein	Peptidase_S8	11
gene-BC332_00404	1.42893	hypothetical protein	Peptidase_S8	11
gene-BC332_11867	1.48575	Subtilisin-like protease SBT1.6	Peptidase_S8	11
novel.9959	-2.96705	PF00201:UDP-glucoronosyl and UDP-glucosyl transferase	UDPGT	11
novel.6137	-2.34608	PF00201:UDP-glucoronosyl and UDP-glucosyl transferase	UDPGT	11
novel.3090	-1.71831	PF00201:UDP-glucoronosyl and UDP-glucosyl transferase	UDPGT	11
novel.7673	-1.32581	PF00201:UDP-glucoronosyl and UDP-glucosyl transferase	UDPGT	11
novel.11847	-1.32467	PF00201:UDP-glucoronosyl and UDP-glucosyl transferase	UDPGT	11
novel.9960	-1.17818	PF00201:UDP-glucoronosyl and UDP-glucosyl transferase	UDPGT	11
novel.4833	-1.16505	PF00201:UDP-glucoronosyl and UDP-glucosyl transferase	UDPGT	11
novel.9438	-1.10395	PF00201:UDP-glucoronosyl and UDP-glucosyl transferase	UDPGT	11
novel.11062	1.01048	PF00201:UDP-glucoronosyl and UDP-glucosyl transferase|PF13976:GAG-pre-integrase domain|PF14244:gag-polypeptide of LTR copia-type|PF00665:Integrase core domain	UDPGT	11
gene-BC332_33029	-4.52579	ABC transporter G family member 15	ABC2_membrane	10
gene-BC332_05003	-2.05136	Pleiotropic drug resistance protein 13	ABC2_membrane	10
gene-BC332_28477	-1.84477	ABC transporter G family member 13	ABC2_membrane	10
gene-BC332_33027	-1.37887	ABC transporter G family member 11	ABC2_membrane	10
gene-BC332_31221	-1.27071	Pleiotropic drug resistance protein 1	ABC2_membrane	10
gene-BC332_20574	1.15977	ABC transporter G family member 14	ABC2_membrane	10
gene-BC332_13877	1.90927	ABC transporter G family member 11	ABC2_membrane	10
gene-BC332_14270	2.27374	hypothetical protein	ABC2_membrane	10
gene-BC332_12698	2.76102	ABC transporter G family member 1	ABC2_membrane	10
gene-BC332_16890	3.05622	Pleiotropic drug resistance protein 1	ABC2_membrane	10
gene-BC332_07465	-6.59014	putative galactinol--sucrose galactosyltransferase 1	RVT_2	10
novel.4202	-1.49701	PF13976:GAG-pre-integrase domain|PF00665:Integrase core domain|PF00098:Zinc knuckle|PF14223:gag-polypeptide of LTR copia-type|PF07727:Reverse transcriptase (RNA-dependent DNA polymerase)	RVT_2	10
novel.4505	-1.21633	PF07727:Reverse transcriptase (RNA-dependent DNA polymerase)	RVT_2	10
gene-BC332_18827	1.4358	hypothetical protein	RVT_2	10
gene-BC332_14751	1.47642	Bidirectional sugar transporter SWEET12	RVT_2	10
gene-BC332_05196	1.54811	Protein trichome birefringence-like 34	RVT_2	10
gene-BC332_18812	1.79995	Long-chain-alcohol oxidase FAO4B	RVT_2	10
gene-BC332_18914	2.52995	hypothetical protein	RVT_2	10
novel.2735	2.76383	PF07727:Reverse transcriptase (RNA-dependent DNA polymerase)	RVT_2	10
novel.3830	3.39362	PF07727:Reverse transcriptase (RNA-dependent DNA polymerase)	RVT_2	10
gene-BC332_11246	-1.31795	WAT1-related protein	DUF6	9
gene-BC332_32860	1.01177	WAT1-related protein	DUF6	9
gene-BC332_23255	1.23579	WAT1-related protein	DUF6	9
gene-BC332_32861	1.33509	WAT1-related protein	DUF6	9
gene-BC332_26704	1.56837	WAT1-related protein	DUF6	9
gene-BC332_10101	1.58247	hypothetical protein	DUF6	9
gene-BC332_26703	1.62702	WAT1-related protein	DUF6	9
gene-BC332_32401	2.05616	WAT1-related protein	DUF6	9
gene-BC332_32399	3.02054	WAT1-related protein	DUF6	9
novel.4060	-2.56768	PF00010:Helix-loop-helix DNA-binding domain|PF08414:Respiratory burst NADPH oxidase	HLH	9
gene-BC332_11941	-1.91487	Transcription factor HEC1	HLH	9
gene-BC332_00736	-1.87958	Transcription factor bHLH96	HLH	9
gene-BC332_09133	-1.56724	Transcription factor PIF3	HLH	9
gene-BC332_08571	-1.15497	Transcription factor bHLH74	HLH	9
gene-BC332_06336	-1.06346	hypothetical protein	HLH	9
gene-BC332_22476	-1.03023	hypothetical protein	HLH	9
gene-BC332_22175	1.49609	Transcription factor bHLH18	HLH	9
gene-BC332_04822	2.61651	hypothetical protein	HLH	9
gene-BC332_12518	-1.05405	hypothetical protein	HMA	9
gene-BC332_08436	1.05153	hypothetical protein	HMA	9
gene-BC332_29153	1.12676	hypothetical protein	HMA	9
gene-BC332_12179	1.1644	hypothetical protein	HMA	9
gene-BC332_05482	1.22394	Heavy metal-associated isoprenylated plant protein 26	HMA	9
gene-BC332_11452	1.86313	Heavy metal-associated isoprenylated plant protein 26	HMA	9
gene-BC332_06838	1.95415	Heavy metal-associated isoprenylated plant protein 26	HMA	9
gene-BC332_00541	2.18699	hypothetical protein	HMA	9
gene-BC332_10684	3.77514	Heavy metal-associated isoprenylated plant protein 26	HMA	9
gene-BC332_20099	-1.82335	NAC domain-containing protein 72	NAM	9
gene-BC332_22030	-1.34047	putative NAC domain-containing protein 94	NAM	9
gene-BC332_09173	1.10186	NAC domain-containing protein	NAM	9
gene-BC332_06095	1.14922	NAC domain-containing protein 10	NAM	9
gene-BC332_20169	1.44441	Transcription factor JUNGBRUNNEN 1	NAM	9
gene-BC332_15939	1.56703	NAC domain-containing protein 45	NAM	9
gene-BC332_07746	1.75643	Protein CUP-SHAPED COTYLEDON 3	NAM	9
gene-BC332_25672	2.15679	NAC domain-containing protein 2	NAM	9
gene-BC332_16582	2.26521	NAC domain-containing protein	NAM	9
gene-BC332_29853	-1.10532	hypothetical protein	Aa_trans	8
gene-BC332_11737	1.03735	Amino acid permease 6	Aa_trans	8
gene-BC332_06232	1.17433	Lysine histidine transporter-like 1	Aa_trans	8
gene-BC332_28985	1.44814	Lysine histidine transporter-like 1	Aa_trans	8
gene-BC332_12210	2.26422	Lysine histidine transporter-like 8	Aa_trans	8
gene-BC332_27309	2.53057	Lysine histidine transporter-like 1	Aa_trans	8
gene-BC332_12209	3.128	Lysine histidine transporter-like 8	Aa_trans	8
gene-BC332_10052	4.28812	Lysine histidine transporter 1	Aa_trans	8
gene-BC332_08666	1.17769	hypothetical protein	AAA	8
gene-BC332_08820	1.25414	Cell division cycle protein 48 -like protein	AAA	8
gene-BC332_05402	1.67961	hypothetical protein	AAA	8
gene-BC332_03249	1.75914	hypothetical protein	AAA	8
gene-BC332_10639	2.37686	hypothetical protein	AAA	8
gene-BC332_24986	2.90111	hypothetical protein	AAA	8
gene-BC332_27775	2.9012	hypothetical protein	AAA	8
gene-BC332_04159	3.08935	hypothetical protein	AAA	8
gene-BC332_24597	-1.28472	Ethylene-responsive transcription factor	AP2	8
gene-BC332_00283	-1.05599	hypothetical protein	AP2	8
gene-BC332_27606	1.46344	Ethylene-responsive transcription factor WIN1	AP2	8
gene-BC332_00610	1.60828	Ethylene-responsive transcription factor	AP2	8
gene-BC332_09287	1.90975	AP2-like ethylene-responsive transcription factor	AP2	8
gene-BC332_16474	2.08788	Ethylene-responsive transcription factor	AP2	8
gene-BC332_07144	2.27103	Ethylene-responsive transcription factor RAP2-3	AP2	8
gene-BC332_04600	2.35922	hypothetical protein	AP2	8
gene-BC332_25897	-2.3543	Tropinone reductase -like protein	adh_short	7
gene-BC332_16689	-2.28556	hypothetical protein	adh_short	7
gene-BC332_26487	-1.72557	Secoisolariciresinol dehydrogenase	adh_short	7
gene-BC332_11287	1.43025	Tropinone reductase -like protein	adh_short	7
gene-BC332_16663	2.68588	Short-chain type dehydrogenase/reductase	adh_short	7
gene-BC332_33042	3.08786	hypothetical protein	adh_short	7
gene-BC332_08718	3.31705	11-beta-hydroxysteroid dehydrogenase 1A	adh_short	7
gene-BC332_23510	1.20538	putative glutathione S-transferase	GST_C	7
gene-BC332_26171	1.51874	putative glutathione S-transferase	GST_C	7
gene-BC332_28013	2.5852	Glutathione S-transferase U16	GST_C	7
gene-BC332_32087	3.01356	hypothetical protein	GST_C	7
gene-BC332_23179	3.21983	putative glutathione S-transferase	GST_C	7
gene-BC332_23487	3.47617	putative glutathione S-transferase	GST_C	7
gene-BC332_23509	5.02999	putative glutathione S-transferase	GST_C	7
gene-BC332_00341	-2.49858	Osmotin-like protein OSML15	Thaumatin	7
gene-BC332_00342	-2.08118	Osmotin-like protein OSML15	Thaumatin	7
gene-BC332_11963	1.30199	DNA damage-binding protein 1	Thaumatin	7
gene-BC332_05969	1.528	hypothetical protein	Thaumatin	7
gene-BC332_08453	1.6825	Pathogenesis-related protein 5	Thaumatin	7
gene-BC332_00345	2.77735	Thaumatin-like protein	Thaumatin	7
gene-BC332_00346	2.84894	hypothetical protein	Thaumatin	7
gene-BC332_19169	-1.176	hypothetical protein	TIR	7
gene-BC332_12323	1.24658	hypothetical protein	TIR	7
gene-BC332_31257	1.27701	hypothetical protein	TIR	7
gene-BC332_09787	1.38314	hypothetical protein	TIR	7
gene-BC332_04983	1.83902	hypothetical protein	TIR	7
gene-BC332_31070	2.57817	hypothetical protein	TIR	7
gene-BC332_31266	3.61831	TMV resistance protein N	TIR	7
novel.10942	-1.76288	PF00005:ABC transporter	ABC_tran	6
gene-BC332_19883	1.55401	ABC transporter C family member 3	ABC_tran	6
gene-BC332_13878	1.88536	hypothetical protein	ABC_tran	6
gene-BC332_33120	2.06063	ABC transporter A family member 5	ABC_tran	6
gene-BC332_33121	2.07598	ABC transporter A family member 2	ABC_tran	6
gene-BC332_29793	5.58207	ABC transporter G family member 12	ABC_tran	6
gene-BC332_22419	-1.05293	hypothetical protein	AMP-binding	6
gene-BC332_08470	1.11806	putative 4-coumarate--CoA ligase 2	AMP-binding	6
gene-BC332_25211	1.59947	4-coumarate--CoA ligase 2	AMP-binding	6
gene-BC332_05190	1.75192	putative acyl-activating enzyme 2	AMP-binding	6
gene-BC332_09814	3.24141	putative acyl-activating enzyme 2	AMP-binding	6
gene-BC332_28017	3.58032	putative acyl-activating enzyme 2	AMP-binding	6
gene-BC332_10479	1.06994	hypothetical protein	C2	6
gene-BC332_20945	1.76124	hypothetical protein	C2	6
gene-BC332_16540	1.89	hypothetical protein	C2	6
gene-BC332_20946	1.99875	hypothetical protein	C2	6
gene-BC332_12737	2.56887	hypothetical protein	C2	6
gene-BC332_20947	2.98669	hypothetical protein	C2	6
gene-BC332_18642	1.0215	Cadmium/zinc-transporting ATPase HMA2	E1-E2_ATPase	6
gene-BC332_11101	1.45853	Plasma membrane ATPase 1	E1-E2_ATPase	6
gene-BC332_15076	1.5143	hypothetical protein	E1-E2_ATPase	6
gene-BC332_13178	1.9624	putative phospholipid-transporting ATPase 11	E1-E2_ATPase	6
gene-BC332_00630	2.7893	Plasma membrane ATPase 1	E1-E2_ATPase	6
gene-BC332_19885	3.67956	hypothetical protein	E1-E2_ATPase	6
gene-BC332_24973	-3.81171	Homeobox-leucine zipper protein HOX6	Homeobox	6
gene-BC332_28613	-1.677	putative WUSCHEL-related homeobox 2	Homeobox	6
gene-BC332_09362	-1.60877	putative WUSCHEL-related homeobox 2	Homeobox	6
gene-BC332_11928	1.03495	WUSCHEL-related homeobox 4	Homeobox	6
gene-BC332_26607	1.18842	Homeobox-leucine zipper protein HOX27	Homeobox	6
gene-BC332_11757	1.64941	Homeobox-leucine zipper protein HAT22	Homeobox	6
novel.10513	1.03188	PF01554:MatE	MatE	6
novel.10471	1.29136	PF01554:MatE	MatE	6
novel.4174	1.60024	PF01554:MatE	MatE	6
novel.3546	2.71888	PF01554:MatE	MatE	6
novel.589	3.37067	PF01554:MatE	MatE	6
gene-BC332_08911	3.71525	hypothetical protein	MatE	6
gene-BC332_31550	-1.53212	putative protein phosphatase 2C 40	PP2C	6
gene-BC332_04454	1.10627	putative protein phosphatase 2C 34	PP2C	6
gene-BC332_14983	1.14189	putative protein phosphatase 2C 25	PP2C	6
gene-BC332_18180	1.4045	hypothetical protein	PP2C	6
gene-BC332_23328	1.64895	hypothetical protein	PP2C	6
gene-BC332_12817	1.74129	putative protein phosphatase 2C 61	PP2C	6
gene-BC332_10412	-1.13961	Monosaccharide-sensing protein 3	Sugar_tr	6
gene-BC332_02750	-1.08272	Sugar transporter ERD6-like 16	Sugar_tr	6
novel.2247	1.078	PF00083:Sugar (and other) transporter	Sugar_tr	6
gene-BC332_04753	1.20138	Sugar transport protein 1	Sugar_tr	6
gene-BC332_13229	3.45857	putative inorganic phosphate transporter 1-9	Sugar_tr	6
gene-BC332_21910	5.12841	hypothetical protein	Sugar_tr	6
gene-BC332_00292	-1.9212	Methylenetetrahydrofolate reductase 1	ABC_membrane	5
gene-BC332_14487	1.15765	ABC transporter B family member 11	ABC_membrane	5
gene-BC332_09301	1.32394	ABC transporter C family member 13	ABC_membrane	5
gene-BC332_07712	2.40137	putative ABC transporter B family member 8	ABC_membrane	5
gene-BC332_10132	3.21052	ABC transporter B family member 12	ABC_membrane	5
gene-BC332_19472	1.21792	hypothetical protein	B_lectin	5
novel.7274	1.78639	PF01453:D-mannose binding lectin|PF08276:PAN-like domain|PF07714:Protein tyrosine kinase|PF00954:S-locus glycoprotein domain	B_lectin	5
gene-BC332_25954	2.25897	hypothetical protein	B_lectin	5
gene-BC332_24423	4.12824	G-type lectin S-receptor-like serine/threonine-protein kinase	B_lectin	5
gene-BC332_04494	4.89682	hypothetical protein	B_lectin	5
gene-BC332_19949	1.17649	hypothetical protein	Cu_bind_like	5
gene-BC332_29597	1.54672	hypothetical protein	Cu_bind_like	5
gene-BC332_11655	1.60752	Blue copper protein	Cu_bind_like	5
gene-BC332_27611	1.7891	hypothetical protein	Cu_bind_like	5
gene-BC332_03099	2.44678	Uclacyanin-3	Cu_bind_like	5
gene-BC332_20615	-1.87434	Cytokinin dehydrogenase 5	FAD_binding_4	5
gene-BC332_18256	-1.38946	Reticuline oxidase-like protein	FAD_binding_4	5
gene-BC332_04203	1.37831	Reticuline oxidase-like protein	FAD_binding_4	5
gene-BC332_08370	2.00224	hypothetical protein	FAD_binding_4	5
gene-BC332_04216	2.70561	Cannabidiolic acid synthase-like 1	FAD_binding_4	5
gene-BC332_32223	1.02705	Glucan endo-1%2C3-beta-glucosidase 7	Glyco_hydro_17	5
gene-BC332_10319	1.08159	Glucan endo-1%2C3-beta-glucosidase 5	Glyco_hydro_17	5
gene-BC332_26668	1.62905	Glucan endo-1%2C3-beta-glucosidase	Glyco_hydro_17	5
gene-BC332_12391	2.53825	Glucan endo-1%2C3-beta-glucosidase	Glyco_hydro_17	5
gene-BC332_01721	2.62628	Glucan endo-1%2C3-beta-glucosidase%2C acidic isoform GI9	Glyco_hydro_17	5
gene-BC332_20017	-1.10352	Cyclic nucleotide-gated ion channel 4	Ion_trans	5
gene-BC332_08533	1.43302	putative cyclic nucleotide-gated ion channel 20%2C chloroplastic	Ion_trans	5
gene-BC332_13550	1.61864	Cyclic nucleotide-gated ion channel 1	Ion_trans	5
gene-BC332_02064	2.18468	Potassium channel AKT1	Ion_trans	5
gene-BC332_21576	2.5327	Cyclic nucleotide-gated ion channel 1	Ion_trans	5
gene-BC332_33267	-6.49415	Phospholipase A1-II 1	Lipase_3	5
gene-BC332_04587	-2.4894	Phospholipase A1-II 1	Lipase_3	5
gene-BC332_04588	-1.87781	Phospholipase A1-II 1	Lipase_3	5
gene-BC332_04629	-1.13917	hypothetical protein	Lipase_3	5
gene-BC332_30992	2.11348	hypothetical protein	Lipase_3	5
gene-BC332_16983	-1.53861	Alcohol-forming fatty acyl-CoA reductase	NAD_binding_4	5
gene-BC332_23193	3.03979	hypothetical protein	NAD_binding_4	5
gene-BC332_33195	3.43764	putative fatty acyl-CoA reductase 4	NAD_binding_4	5
gene-BC332_33193	3.58992	hypothetical protein	NAD_binding_4	5
gene-BC332_28864	3.69549	Fatty acyl-CoA reductase 1	NAD_binding_4	5
gene-BC332_22548	1.5738	putative cysteine proteinase	Peptidase_C1	5
gene-BC332_04431	1.6865	hypothetical protein	Peptidase_C1	5
gene-BC332_22313	1.76984	Cysteine proteinase RD21a	Peptidase_C1	5
novel.12753	3.25645	PF08246:Cathepsin propeptide inhibitor domain (I29)|PF00112:Papain family cysteine protease	Peptidase_C1	5
gene-BC332_33259	3.60666	hypothetical protein	Peptidase_C1	5
gene-BC332_08670	2.19955	Subtilisin-like protease SBT3.3	Peptidase_S8	5
gene-BC332_08672	2.35873	Subtilisin-like protease SBT3.5	Peptidase_S8	5
gene-BC332_20415	2.36486	hypothetical protein	Peptidase_S8	5
gene-BC332_04328	3.32108	hypothetical protein	Peptidase_S8	5
gene-BC332_00414	5.34676	hypothetical protein	Peptidase_S8	5
gene-BC332_10347	-1.40727	Homeobox-leucine zipper protein MERISTEM L1	START	5
gene-BC332_04935	-1.34057	Homeobox-leucine zipper protein MERISTEM L1	START	5
gene-BC332_00857	-1.28646	Homeobox-leucine zipper protein ROC3	START	5
novel.3	-1.15307	PF01852:START domain	START	5
gene-BC332_25269	-1.11345	Homeobox-leucine zipper protein MERISTEM L1	START	5
gene-BC332_05725	-1.14954	Dof zinc finger protein PBF	zf-Dof	5
gene-BC332_08866	1.17456	Dof zinc finger protein DOF4.6	zf-Dof	5
gene-BC332_23297	1.2432	Dof zinc finger protein DOF3.6	zf-Dof	5
gene-BC332_25938	1.24824	Dof zinc finger protein DOF3.6	zf-Dof	5
gene-BC332_11185	1.42374	Dof zinc finger protein DOF1.2	zf-Dof	5
gene-BC332_28618	2.52182	putative trans-2-enoyl-CoA reductase%2C mitochondrial	ADH_zinc_N	4
gene-BC332_28619	2.91981	putative trans-2-enoyl-CoA reductase%2C mitochondrial	ADH_zinc_N	4
gene-BC332_15737	3.07355	Alcohol dehydrogenase 2	ADH_zinc_N	4
gene-BC332_11142	3.32618	Alcohol dehydrogenase 1	ADH_zinc_N	4
gene-BC332_29083	-4.4671	hypothetical protein	Auxin_inducible	4
gene-BC332_12113	-1.96013	Indole-3-acetic acid-induced protein ARG7	Auxin_inducible	4
gene-BC332_23494	1.45631	hypothetical protein	Auxin_inducible	4
gene-BC332_08650	1.8289	hypothetical protein	Auxin_inducible	4
gene-BC332_19345	-2.59575	Basic leucine zipper 61	bZIP_1	4
gene-BC332_24163	-2.16681	Basic leucine zipper 61	bZIP_1	4
gene-BC332_19592	-1.23912	Basic leucine zipper 34	bZIP_1	4
gene-BC332_26624	6.16995	hypothetical protein	bZIP_1	4
gene-BC332_28120	1.13821	hypothetical protein	F-box	4
gene-BC332_22168	1.64403	hypothetical protein	F-box	4
gene-BC332_19646	1.84367	hypothetical protein	F-box	4
novel.10041	2.44641	PF00646:F-box domain	F-box	4
gene-BC332_27365	-1.14818	putative galacturonosyltransferase-like 6	Glyco_transf_8	4
gene-BC332_12304	1.04038	putative galacturonosyltransferase 6	Glyco_transf_8	4
gene-BC332_30194	1.40308	UDP-glucuronate:xylan alpha-glucuronosyltransferase 1	Glyco_transf_8	4
gene-BC332_32155	1.65574	putative galacturonosyltransferase-like 7	Glyco_transf_8	4
gene-BC332_15047	-1.12852	hypothetical protein	HSF_DNA-bind	4
gene-BC332_12292	1.03191	Heat stress transcription factor B-2b	HSF_DNA-bind	4
gene-BC332_10178	1.04043	hypothetical protein	HSF_DNA-bind	4
gene-BC332_04389	1.9372	hypothetical protein	HSF_DNA-bind	4
gene-BC332_09360	-1.11869	Phosphoethanolamine N-methyltransferase 1	Methyltransf_11	4
gene-BC332_26640	1.37114	Cycloartenol-C-24-methyltransferase 1	Methyltransf_11	4
gene-BC332_16539	1.51715	Phosphoethanolamine N-methyltransferase	Methyltransf_11	4
gene-BC332_08218	2.60625	hypothetical protein	Methyltransf_11	4
gene-BC332_18077	-1.12106	Serine carboxypeptidase-like 25	Peptidase_S10	4
novel.11394	1.10885	PF00450:Serine carboxypeptidase	Peptidase_S10	4
gene-BC332_30918	1.13775	hypothetical protein	Peptidase_S10	4
novel.7530	1.2267	PF00450:Serine carboxypeptidase	Peptidase_S10	4
novel.3698	-1.638	PF00078:Reverse transcriptase (RNA-dependent DNA polymerase)	RVT_1	4
gene-BC332_02764	-1.17397	Isoleucine--tRNA ligase	RVT_1	4
novel.11857	-1.15726	PF00078:Reverse transcriptase (RNA-dependent DNA polymerase)|PF17919:RNase H-like domain found in reverse transcriptase|PF01693:Caulimovirus viroplasmin	RVT_1	4
novel.3821	2.18963	PF00078:Reverse transcriptase (RNA-dependent DNA polymerase)|PF04970:Lecithin retinol acyltransferase	RVT_1	4
gene-BC332_07113	-6.17761	hypothetical protein	Abhydrolase_3	3
gene-BC332_10055	-1.1755	putative carboxylesterase 11	Abhydrolase_3	3
gene-BC332_04162	2.28397	hypothetical protein	Abhydrolase_3	3
gene-BC332_17295	-2.83356	actin	Actin	3
gene-BC332_14201	1.55808	actin	Actin	3
novel.6507	2.31829	PF00022:Actin	Actin	3
gene-BC332_13641	-5.63326	1-aminocyclopropane-1-carboxylate synthase	Aminotran_1_2	3
gene-BC332_11786	-4.40065	1-aminocyclopropane-1-carboxylate synthase	Aminotran_1_2	3
gene-BC332_31833	-3.40324	hypothetical protein	Aminotran_1_2	3
gene-BC332_13865	-1.10395	BTB/POZ domain-containing protein DOT3	BTB	3
gene-BC332_18772	1.02955	Regulatory protein NPR3	BTB	3
gene-BC332_19817	1.19024	BTB/POZ domain-containing protein	BTB	3
gene-BC332_02362	1.23267	Nuclear transcription factor Y subunit A-9	CBFB_NFYA	3
gene-BC332_24682	1.41402	Nuclear transcription factor Y subunit A-6	CBFB_NFYA	3
gene-BC332_32013	1.69293	Nuclear transcription factor Y subunit A-4	CBFB_NFYA	3
gene-BC332_31882	1.2104	putative transmembrane ascorbate ferrireductase 3	Cytochrom_B561	3
gene-BC332_04297	1.70716	hypothetical protein	Cytochrom_B561	3
gene-BC332_29356	3.15909	Cytochrome and DOMON domain-containing protein	Cytochrom_B561	3
gene-BC332_02570	-7.53963	hypothetical protein	Epimerase	3
gene-BC332_12978	-1.24572	Tetraketide alpha-pyrone reductase 1	Epimerase	3
gene-BC332_16511	1.15528	Cinnamoyl-CoA reductase 1	Epimerase	3
gene-BC332_00297	1.05499	Respiratory burst oxidase -like protein A	FAD_binding_8	3
gene-BC332_33427	1.26254	Respiratory burst oxidase -like protein A	FAD_binding_8	3
gene-BC332_21512	2.5282	Ferric reduction oxidase 2	FAD_binding_8	3
gene-BC332_02996	1.2172	hypothetical protein	GST_N	3
gene-BC332_14846	1.64003	putative glutathione S-transferase	GST_N	3
gene-BC332_23178	1.78224	putative glutathione S-transferase	GST_N	3
gene-BC332_03722	-1.01659	STS14 protein	SCP	3
gene-BC332_22222	2.70714	Basic form of pathogenesis-related protein 1	SCP	3
gene-BC332_22213	3.42119	Pathogenesis-related protein 1C	SCP	3
gene-BC332_01321	1.57917	MADS-box transcription factor 56	SRF-TF	3
novel.7109	5.40637	PF00319:SRF-type transcription factor (DNA-binding and dimerisation domain)	SRF-TF	3
novel.214	5.92481	PF00319:SRF-type transcription factor (DNA-binding and dimerisation domain)	SRF-TF	3
gene-BC332_06833	1.37152	hypothetical protein	U-box	3
gene-BC332_17573	1.59191	E3 ubiquitin-protein ligase CHIP	U-box	3
gene-BC332_31982	2.0935	hypothetical protein	U-box	3
gene-BC332_18628	-1.4277	hypothetical protein	Aldo_ket_red	2
gene-BC332_15059	1.19554	putative aldo-keto reductase 1	Aldo_ket_red	2
gene-BC332_25829	1.5557	Ammonium transporter 2 member 2	Ammonium_transp	2
gene-BC332_07363	3.16602	Ammonium transporter 3 member 1	Ammonium_transp	2
gene-BC332_05112	1.23988	Aspartic proteinase A1	Asp	2
gene-BC332_03404	1.42887	Aspartic proteinase A2	Asp	2
gene-BC332_22890	-1.71469	B3 domain-containing protein	B3	2
novel.2884	2.99106	PF02362:B3 DNA binding domain	B3	2
gene-BC332_02789	1.685	hypothetical protein	C1_3	2
gene-BC332_02782	2.33409	hypothetical protein	C1_3	2
gene-BC332_11312	1.06	putative choline kinase 3	Choline_kinase	2
gene-BC332_26913	1.15516	putative choline kinase 3	Choline_kinase	2
gene-BC332_11281	1.03667	Vacuolar iron transporter -like protein 4	DUF125	2
gene-BC332_32498	2.02421	Vacuolar iron transporter -like protein 4	DUF125	2
novel.4207	-1.71281	PF03372:Endonuclease/Exonuclease/phosphatase family	Exo_endo_phos	2
gene-BC332_02825	1.76425	hypothetical protein	Exo_endo_phos	2
gene-BC332_02226	-2.21441	Beta-glucosidase 12	Glyco_hydro_1	2
gene-BC332_02223	-1.28905	Furcatin hydrolase	Glyco_hydro_1	2
gene-BC332_24726	1.13095	Sucrose synthase	Glycos_transf_1	2
gene-BC332_08522	1.32105	Sucrose synthase 5	Glycos_transf_1	2
gene-BC332_08914	-1.02084	C2 and GRAM domain-containing protein	GRAM	2
gene-BC332_02136	1.09954	GEM-like protein 5	GRAM	2
gene-BC332_16490	1.48415	hypothetical protein	IBR	2
gene-BC332_09178	4.25481	hypothetical protein	IBR	2
gene-BC332_11658	1.72575	MADS-box transcription factor 27	K-box	2
gene-BC332_34260	2.78533	Agamous-like MADS-box protein AGL8 -like protein	K-box	2
gene-BC332_00215	2.8219	3-oxoacyl-[acyl-carrier-protein] synthase I%2C chloroplastic	ketoacyl-synt	2
gene-BC332_00213	3.2217	3-oxoacyl-[acyl-carrier-protein] synthase I%2C chloroplastic	ketoacyl-synt	2
gene-BC332_23706	-1.74036	hypothetical protein	Lipoxygenase	2
gene-BC332_07051	1.14758	hypothetical protein	Lipoxygenase	2
gene-BC332_27017	-1.01557	Protein ZINC INDUCED FACILITATOR 1	MFS_1	2
gene-BC332_12182	1.12307	hypothetical protein	MFS_1	2
gene-BC332_22247	2.08326	hypothetical protein	Mpv17_PMP22	2
gene-BC332_15547	2.47862	Peroxisomal membrane protein PMP22	Mpv17_PMP22	2
gene-BC332_15838	-1.88167	Cation/H(+) antiporter 15	Na_H_Exchanger	2
gene-BC332_00180	4.15158	Cation/H(+) antiporter 19	Na_H_Exchanger	2
gene-BC332_00065	-1.53893	Oligopeptide transporter 6	OPT	2
gene-BC332_11708	1.24299	Oligopeptide transporter 6	OPT	2
gene-BC332_33022	1.03455	Metacaspase-1	Peptidase_C14	2
gene-BC332_07476	2.25885	Metacaspase-2	Peptidase_C14	2
gene-BC332_21079	1.21505	ATP-dependent 6-phosphofructokinase 7	PFK	2
gene-BC332_12556	1.61485	ATP-dependent 6-phosphofructokinase 3	PFK	2
gene-BC332_33944	1.03014	Phosphoinositide phospholipase C 6	PI-PLC-X	2
gene-BC332_17350	1.41508	Phosphoinositide phospholipase C 7	PI-PLC-X	2
gene-BC332_17006	1.23853	Protein argonaute 1A	Piwi	2
gene-BC332_01941	1.51804	Protein argonaute 7	Piwi	2
gene-BC332_17331	1.16654	Ras-related protein Rab11A	Ras	2
gene-BC332_13918	1.28868	Ras-related protein RABA2c	Ras	2
gene-BC332_07696	-1.24334	Thiosulfate/3-mercaptopyruvate sulfurtransferase 1%2C mitochondrial	Rhodanese	2
gene-BC332_33079	4.56658	Rhodanese-like domain-containing protein 19%2C mitochondrial	Rhodanese	2
gene-BC332_29829	1.14214	Endoribonuclease Dicer -like protein 2	Ribonuclease_3	2
gene-BC332_29828	2.82308	Endoribonuclease Dicer -like protein 2	Ribonuclease_3	2
gene-BC332_03120	2.85381	Carotenoid cleavage dioxygenase 7%2C chloroplastic	RPE65	2
gene-BC332_29216	2.92699	hypothetical protein	RPE65	2
gene-BC332_12023	1.15119	Serpin-ZX	Serpin	2
gene-BC332_12025	1.49787	Serpin-ZX	Serpin	2
gene-BC332_29700	1.4599	Protein HVA22	TB2_DP1_HVA22	2
gene-BC332_08512	2.12439	HVA22-like protein d	TB2_DP1_HVA22	2
gene-BC332_13255	1.25538	Tetraspanin-2	Tetraspannin	2
gene-BC332_30756	1.32395	Tetraspanin-5	Tetraspannin	2
gene-BC332_23055	1.21793	Polyubiquitin	ubiquitin	2
gene-BC332_33151	1.4642	hypothetical protein	ubiquitin	2
novel.3196	1.51592	PF00201:UDP-glucoronosyl and UDP-glucosyl transferase	UDPGT	2
novel.8089	2.00243	PF00201:UDP-glucoronosyl and UDP-glucosyl transferase	UDPGT	2
gene-BC332_10499	1.01161	hypothetical protein	UQ_con	2
gene-BC332_31416	6.13629	Sumo-conjugating enzyme ubc9	UQ_con	2
gene-BC332_01330	1.26727	Glyoxylate/hydroxypyruvate reductase HPR3	2-Hacid_dh_C	1
gene-BC332_11726	1.74534	hypothetical protein	3_5_exonuc	1
gene-BC332_16423	1.18492	hypothetical protein	Abhydrolase_2	1
novel.12454	1.54416	PF00583:Acetyltransferase (GNAT) family	Acetyltransf_1	1
gene-BC332_11513	1.81586	Alcohol dehydrogenase-like 1	ADH_N	1
novel.627	1.88838	PF00406:Adenylate kinase	ADK	1
gene-BC332_28070	1.63187	Aldehyde dehydrogenase%2C mitochondrial	Aldedh	1
gene-BC332_06043	2.7824	hypothetical protein	Aldose_epim	1
gene-BC332_09254	1.75095	hypothetical protein	Amidase	1
gene-BC332_06315	-2.09489	hypothetical protein	Amino_oxidase	1
gene-BC332_30181	2.36688	hypothetical protein	Aminotran_5	1
gene-BC332_30292	-2.78243	ATP synthase subunit alpha%2C chloroplastic	ATP-synt_ab_C	1
gene-BC332_15449	-1.14892	putative low-specificity L-threonine aldolase 1	Beta_elim_lyase	1
gene-BC332_23147	-1.95311	S-type anion channel SLAH3	C4dic_mal_tran	1
gene-BC332_15078	2.22003	putative calcium-transporting ATPase 13%2C plasma membrane-type	Cation_ATPase_C	1
gene-BC332_32249	1.38205	hypothetical protein	CBS	1
gene-BC332_17971	-1.34384	hypothetical protein	CCT	1
gene-BC332_08882	1.62169	hypothetical protein	DUF295	1
gene-BC332_31349	1.64473	Rop guanine nucleotide exchange factor 14	DUF315	1
gene-BC332_19694	1.03363	hypothetical protein	DUF605	1
gene-BC332_27535	2.30467	Enoyl-CoA delta isomerase 1%2C peroxisomal	ECH	1
gene-BC332_31079	2.12372	hypothetical protein	efhand	1
gene-BC332_09076	2.62321	hypothetical protein	Exo70	1
gene-BC332_02286	1.57019	hypothetical protein	FAD_binding_3	1
gene-BC332_30272	-1.17938	hypothetical protein	FGGY_N	1
gene-BC332_20841	-1.3406	Formin-like protein 1	FH2	1
gene-BC332_11116	-1.33497	FHA domain-containing protein PS1	FHA	1
gene-BC332_21660	-2.02078	NADPH:quinone oxidoreductase	FMN_red	1
gene-BC332_22614	-1.63571	hypothetical protein	FMO-like	1
gene-BC332_03133	-1.41663	GATA transcription factor 2	GATA	1
gene-BC332_00600	-1.03927	hypothetical protein	GFO_IDH_MocA	1
gene-BC332_29759	-1.42838	hypothetical protein	Glyco_hydro_20	1
gene-BC332_28342	-1.12257	Beta-D-xylosidase 4	Glyco_hydro_3_C	1
gene-BC332_12757	-3.02436	Alpha-glucosidase	Glyco_hydro_31	1
gene-BC332_05323	1.20554	Scarecrow-like protein 15	GRAS	1
gene-BC332_01227	2.05453	Eukaryotic translation initiation factor 2 subunit 3	GTP_EFTU	1
novel.939	1.85429	PF05699:hAT family C-terminal dimerisation region	hATC	1
gene-BC332_06842	-1.4102	Endonuclease III -like protein 1%2C chloroplastic	HhH-GPD	1
gene-BC332_32076	-1.07267	hypothetical protein	Histone	1
novel.8053	-1.36539	PF01627:Hpt domain	Hpt	1
gene-BC332_10322	4.92001	hypothetical protein	HSP70	1
gene-BC332_15505	-1.59407	hypothetical protein	IQ	1
gene-BC332_20547	-1.64275	Lysine-specific demethylase	JmjC	1
novel.12883	-2.40523	PF01268:Formate--tetrahydrofolate ligase|PF02705:K+ potassium transporter	K_trans	1
gene-BC332_02313	-1.61971	hypothetical protein	LAG1	1
gene-BC332_12980	1.50481	hypothetical protein	MATH	1
gene-BC332_02432	1.24749	hypothetical protein	Metallophos	1
gene-BC332_00278	1.11616	Mitochondrial adenine nucleotide transporter ADNT1	Mito_carr	1
gene-BC332_23390	-1.16124	Vacuolar cation/proton exchanger 3	Na_Ca_ex	1
novel.3251	-1.07321	PF03446:NAD binding domain of 6-phosphogluconate dehydrogenase|PF14833:NAD-binding of NADP-dependent 3-hydroxyisobutyrate dehydrogenase	NAD_binding_2	1
gene-BC332_19864	-1.80276	Nudix hydrolase 10	NUDIX	1
gene-BC332_22098	6.00505	12-oxophytodienoate reductase 1	Oxidored_FMN	1
gene-BC332_21436	-1.32802	L-3-cyanoalanine synthase 2%2C mitochondrial	PALP	1
gene-BC332_28025	-1.53301	IAA-amino acid hydrolase ILR1-like 1	Peptidase_M20	1
gene-BC332_06536	-1.06423	hypothetical protein	PG_binding_1	1
gene-BC332_28129	-1.374	hypothetical protein	PGM_PMM_II	1
gene-BC332_09759	-2.38917	Photosystem II protein D1	Photo_RC	1
gene-BC332_21610	-1.84824	Phosphatidylinositol 4-phosphate 5-kinase 4	PIP5K	1
gene-BC332_01918	2.60608	Pumilio -like protein 11	PUF	1
gene-BC332_14988	-1.06102	Internal alternative NAD(P)H-ubiquinone oxidoreductase A1%2C mitochondrial	Pyr_redox_2	1
gene-BC332_02231	-1.23927	Sister chromatid cohesion 1 protein 4	Rad21_Rec8_N	1
novel.4145	-1.4203	PF00076:RNA recognition motif. (a.k.a. RRM, RBD, or RNP domain)	RRM_1	1
gene-BC332_18531	-1.67507	Ribulose bisphosphate carboxylase large chain	RuBisCO_large	1
gene-BC332_26162	-1.30034	Phosphatidylinositol:ceramide inositolphosphotransferase	rve	1
gene-BC332_34246	1.25801	Histone-lysine N-methyltransferase CLF	SET	1
novel.3206	-1.26412	PF00685:Sulfotransferase domain	Sulfotransfer_1	1
gene-BC332_20566	-1.22881	hypothetical protein	TBPIP	1
gene-BC332_23892	1.32359	3-ketoacyl-CoA thiolase 2%2C peroxisomal	Thiolase_N	1
gene-BC332_04616	2.37844	Pyruvate decarboxylase 1	TPP_enzyme_N	1
gene-BC332_23967	1.46906	Asparagine--tRNA ligase%2C cytoplasmic 2	tRNA-synt_2	1
gene-BC332_14553	1.41244	hypothetical protein	Usp	1
gene-BC332_24041	1.61934	hypothetical protein	UvrD-helicase	1
novel.3246	2.41466	PF00400:WD domain, G-beta repeat	WD40	1
gene-BC332_20694	-1.406	Exonuclease 1	XPG_I	1
gene-BC332_25119	-1.91623	Protein YABBY 4	YABBY	1
gene-BC332_29983	1.88684	hypothetical protein	zf-A20	1
gene-BC332_25095	1.2139	E3 ubiquitin-protein ligase RMA1H1	zf-C3HC4	1
gene-BC332_32111	1.2622	hypothetical protein	zf-GRF	1
gene-BC332_08548	-2.67668	hypothetical protein	ZF-HD_dimer	1
gene-BC332_24719	1.09984	hypothetical protein	Zim	1
gene-BC332_22425	1.53575	hypothetical protein	ZZ	1

## Sheet: CCb6vsCCb3
Supplementary Table S8. Information of DEG encoding transcription factor
Gene_id	Log2FoldChange	Gene_description	TF_family	Number
gene-BC332_17371	4.5483	Cytochrome 86A7	p450	21
gene-BC332_01731	4.46503	hypothetical protein	p450	21
gene-BC332_12646	4.09497	Cytochrome	p450	21
gene-BC332_30249	3.99009	hypothetical protein	p450	21
gene-BC332_25053	3.77109	Cytochrome	p450	21
gene-BC332_12647	2.89665	Cytochrome	p450	21
gene-BC332_19083	2.54667	hypothetical protein	p450	21
gene-BC332_30314	2.42933	hypothetical protein	p450	21
gene-BC332_08780	2.40534	Cytochrome P450 71A6	p450	21
gene-BC332_18209	2.25214	hypothetical protein	p450	21
gene-BC332_29022	2.15064	Flavonoid 3'%2C5'hydroxylase	p450	21
gene-BC332_26580	2.08581	hypothetical protein	p450	21
gene-BC332_17119	1.97876	hypothetical protein	p450	21
gene-BC332_27038	1.8098	hypothetical protein	p450	21
gene-BC332_09110	1.54167	Flavonoid 3'monooxygenase	p450	21
gene-BC332_25056	1.47831	Cytochrome	p450	21
gene-BC332_15778	1.34721	Cytochrome 71D7	p450	21
gene-BC332_31458	1.2382	hypothetical protein	p450	21
gene-BC332_11998	1.22102	hypothetical protein	p450	21
gene-BC332_24456	-1.41726	CytochromeA4	p450	21
gene-BC332_19735	-2.3618	CytochromeB1	p450	21
gene-BC332_27227	1.95902	hypothetical protein	Pkinase	8
gene-BC332_30213	1.39326	hypothetical protein	Pkinase	8
gene-BC332_10350	1.36538	hypothetical protein	Pkinase	8
gene-BC332_10167	1.20021	hypothetical protein	Pkinase	8
gene-BC332_26129	1.057	Leucinerich repeat receptorlike serine/threonine/tyrosineprotein kinase SOBIR1	Pkinase	8
gene-BC332_24620	1.0092	hypothetical protein	Pkinase	8
gene-BC332_03918	-1.51705	Protein kinase G11A	Pkinase	8
gene-BC332_01495	-5.68181	Calciumdependent protein kinase 17	Pkinase	8
gene-BC332_04876	3.32832	Gtype lectin Sreceptorlike serine/threonineprotein kinase	Pkinase_Tyr	7
gene-BC332_17895	2.47676	hypothetical protein	Pkinase_Tyr	7
gene-BC332_28891	1.61945	Gtype lectin Sreceptorlike serine/threonineprotein kinase	Pkinase_Tyr	7
gene-BC332_20028	1.57705	hypothetical protein	Pkinase_Tyr	7
gene-BC332_04880	1.39662	Gtype lectin Sreceptorlike serine/threonineprotein kinase	Pkinase_Tyr	7
gene-BC332_14048	-1.0527	putative leucinerich repeat receptorlike protein kinase IMK3	Pkinase_Tyr	7
gene-BC332_08948	-2.43627	hypothetical protein	Pkinase_Tyr	7
gene-BC332_21277	4.96024	hypothetical protein	WRKY	6
gene-BC332_11349	4.51144	putative WRKY transcription factor 59	WRKY	6
gene-BC332_30517	4.34	putative WRKY transcription factor 23	WRKY	6
gene-BC332_07394	4.21716	hypothetical protein	WRKY	6
gene-BC332_26043	3.37059	hypothetical protein	WRKY	6
gene-BC332_25469	3.34558	putative WRKY transcription factor 66	WRKY	6
gene-BC332_08718	1.18324	11betahydroxysteroid dehydrogenase 1A	adh_short	5
gene-BC332_25942	-1.58384	Shortchain dehydrogenase TIC 32%2C chloroplastic	adh_short	5
gene-BC332_08815	-1.68895	hypothetical protein	adh_short	5
gene-BC332_25897	-2.03744	Tropinone reductase like protein	adh_short	5
gene-BC332_16689	-2.41328	hypothetical protein	adh_short	5
gene-BC332_24399	2.97134	putative Myb family transcription factor	Myb_DNAbinding	5
gene-BC332_22966	1.66991	Transcription factor RAX2	Myb_DNAbinding	5
gene-BC332_14907	1.39257	Transcription factor MYB48	Myb_DNAbinding	5
gene-BC332_17123	1.38802	Transcription factor MYB59	Myb_DNAbinding	5
gene-BC332_03406	1.3816	Protein REVEILLE 7like	Myb_DNAbinding	5
gene-BC332_06798	2.85925	1aminocyclopropane1carboxylate oxidase like protein 3	2OGFeII_Oxy	4
gene-BC332_23039	1.67379	Flavonol synthase/flavanone 3hydroxylase	2OGFeII_Oxy	4
gene-BC332_20712	1.37685	putative 2oxoglutarate/Fe(II)dependent dioxygenase	2OGFeII_Oxy	4
gene-BC332_05284	1.33421	Naringenin%2C2oxoglutarate 3dioxygenase	2OGFeII_Oxy	4
gene-BC332_16890	1.54999	Pleiotropic drug resistance protein 1	ABC2_membrane	4
gene-BC332_32407	1.20702	ABC transporter G family member 11	ABC2_membrane	4
gene-BC332_13877	1.19842	ABC transporter G family member 11	ABC2_membrane	4
gene-BC332_14318	-2.41529	Pleiotropic drug resistance protein 2	ABC2_membrane	4
gene-BC332_23224	5.55563	hypothetical protein	NAD_binding_4	4
gene-BC332_23222	2.84369	hypothetical protein	NAD_binding_4	4
gene-BC332_23193	1.93219	hypothetical protein	NAD_binding_4	4
gene-BC332_33193	1.17429	hypothetical protein	NAD_binding_4	4
gene-BC332_24701	4.75135	hypothetical protein	NBARC	4
gene-BC332_33948	2.09536	hypothetical protein	NBARC	4
gene-BC332_16130	1.9245	hypothetical protein	NBARC	4
gene-BC332_14459	1.10223	hypothetical protein	NBARC	4
gene-BC332_27775	3.60359	hypothetical protein	AAA	3
gene-BC332_10639	1.3256	hypothetical protein	AAA	3
gene-BC332_31685	1.29761	Ribulose bisphosphate carboxylase/oxygenase activase 2%2C chloroplastic	AAA	3
gene-BC332_24423	3.52828	Gtype lectin Sreceptorlike serine/threonineprotein kinase	B_lectin	3
novel.7274	2.5104	PF01453:Dmannose binding lectin|PF08276:PANlike domain|PF07714:Protein tyrosine kinase|PF00954:Slocus glycoprotein domain	B_lectin	3
gene-BC332_19472	1.33977	hypothetical protein	B_lectin	3
gene-BC332_28771	2.85681	Indole3acetaldehyde oxidase	Fer2	3
gene-BC332_28765	1.81842	Indole3acetaldehyde oxidase	Fer2	3
gene-BC332_20600	1.51798	hypothetical protein	Fer2	3
gene-BC332_06838	1.65501	Heavy metalassociated isoprenylated plant protein 26	HMA	3
gene-BC332_29153	1.02842	hypothetical protein	HMA	3
gene-BC332_05256	-1.98015	Heavy metalassociated isoprenylated plant protein 26	HMA	3
gene-BC332_10127	1.99617	hypothetical protein	Lipase_GDSL	3
gene-BC332_21995	1.12696	hypothetical protein	Lipase_GDSL	3
gene-BC332_11606	-3.53326	GDSL esterase/lipase	Lipase_GDSL	3
gene-BC332_00345	2.63044	Thaumatinlike protein	Thaumatin	3
gene-BC332_30456	2.08175	Pathogenesisrelated protein R major form	Thaumatin	3
gene-BC332_22709	-1.04238	Thaumatinlike protein 1	Thaumatin	3
gene-BC332_09814	2.12778	putative acylactivating enzyme 2	AMPbinding	2
gene-BC332_05061	2.11116	putative acylactivating enzyme 12%2C peroxisomal	AMPbinding	2
gene-BC332_31231	2.79838	Chalcone synthase 2	Chal_sti_synt_N	2
gene-BC332_13973	1.57107	Chalcone synthase 2	Chal_sti_synt_N	2
gene-BC332_04854	1.5989	hypothetical protein	FAD_binding_4	2
gene-BC332_04205	-1.12751	hypothetical protein	FAD_binding_4	2
gene-BC332_12391	4.0989	Glucan endo1%2C3betaglucosidase	Glyco_hydro_17	2
gene-BC332_01721	1.83132	Glucan endo1%2C3betaglucosidase%2C acidic isoform GI9	Glyco_hydro_17	2
gene-BC332_07528	-2.55997	Histone H2B	Histone	2
gene-BC332_07525	-2.79383	Histone H2B	Histone	2
gene-BC332_07437	1.77921	hypothetical protein	HLH	2
gene-BC332_30995	-2.2345	Transcription factor HEC2	HLH	2
gene-BC332_27114	-3.59649	Homeoboxleucine zipper protein HOX3	Homeobox	2
gene-BC332_28613	-3.63337	putative WUSCHELrelated homeobox 2	Homeobox	2
gene-BC332_34260	1.71048	Agamouslike MADSbox protein AGL8 like protein	Kbox	2
gene-BC332_16575	1.17588	Agamouslike MADSbox protein AGL8 like protein	Kbox	2
gene-BC332_14294	6.34986	hypothetical protein	LRRNT_2	2
gene-BC332_28736	3.48382	hypothetical protein	LRRNT_2	2
gene-BC332_29216	4.23761	hypothetical protein	RPE65	2
gene-BC332_03120	1.14352	Carotenoid cleavage dioxygenase 7%2C chloroplastic	RPE65	2
novel.10253	2.25259	PF17919:RNase Hlike domain found in reverse transcriptase|PF00077:Retroviral aspartyl protease|PF00078:Reverse transcriptase (RNAdependent DNA polymerase)	RVT_1	2
novel.8737	-1.0567	PF13456:Reverse transcriptaselike|PF00078:Reverse transcriptase (RNAdependent DNA polymerase)	RVT_1	2
gene-BC332_18812	2.16678	Longchainalcohol oxidase FAO4B	RVT_2	2
gene-BC332_18914	1.65308	hypothetical protein	RVT_2	2
gene-BC332_23156	2.19742	Pathogenesisrelated leaf protein 6	SCP	2
gene-BC332_22213	1.54355	Pathogenesisrelated protein 1C	SCP	2
gene-BC332_13229	2.34782	putative inorganic phosphate transporter 19	Sugar_tr	2
gene-BC332_10412	-1.04805	Monosaccharidesensing protein 3	Sugar_tr	2
gene-BC332_27584	1.01119	Transcription factor TCP23	TCP	2
gene-BC332_19595	-1.05684	Transcription factor TCP4	TCP	2
gene-BC332_06833	1.3793	hypothetical protein	Ubox	2
gene-BC332_32004	-1.82853	E3 ubiquitinprotein ligase PUB22	Ubox	2
novel.3196	1.99394	PF00201:UDPglucoronosyl and UDPglucosyl transferase	UDPGT	2
novel.8089	1.86623	PF00201:UDPglucoronosyl and UDPglucosyl transferase	UDPGT	2
gene-BC332_06232	1.33563	Lysine histidine transporterlike 1	Aa_trans	1
gene-BC332_19883	1.29775	ABC transporter C family member 3	ABC_tran	1
gene-BC332_04162	1.36195	hypothetical protein	Abhydrolase_3	1
gene-BC332_30783	1.1138	Actin7	Actin	1
gene-BC332_29652	-2.60233	8hydroxygeraniol dehydrogenase	ADH_N	1
gene-BC332_28618	1.77706	putative trans2enoylCoA reductase%2C mitochondrial	ADH_zinc_N	1
gene-BC332_28070	3.73577	Aldehyde dehydrogenase%2C mitochondrial	Aldedh	1
gene-BC332_06043	2.28904	hypothetical protein	Aldose_epim	1
gene-BC332_09254	1.00701	hypothetical protein	Amidase	1
gene-BC332_02782	2.92429	hypothetical protein	C1_3	1
gene-BC332_20947	4.13509	hypothetical protein	C2	1
gene-BC332_05990	1.25044	hypothetical protein	Cu_bind_like	1
gene-BC332_27535	1.82795	EnoylCoA delta isomerase 1%2C peroxisomal	ECH	1
gene-BC332_19646	1.77362	hypothetical protein	Fbox	1
gene-BC332_25010	1.34888	Peroxisomal (S)2hydroxyacid oxidase GLO1	FMN_dh	1
gene-BC332_15626	-1.2408	hypothetical protein	Glyco_hydro_3	1
gene-BC332_23179	1.47853	putative glutathione Stransferase	GST_C	1
gene-BC332_29195	1.01131	Elongation factor 1alpha	GTP_EFTU	1
novel.12383	1.73409	PF05699:hAT family Cterminal dimerisation region|PF13966:zincbinding in reverse transcriptase	hATC	1
novel.10502	-1.27561	PF01627:Hpt domain	Hpt	1
gene-BC332_07209	1.1035	Heat stress transcription factor A2b	HSF_DNAbind	1
gene-BC332_09178	3.56487	hypothetical protein	IBR	1
gene-BC332_20547	-1.78872	Lysinespecific demethylase	JmjC	1
gene-BC332_00213	3.32026	3oxoacyl[acylcarrierprotein] synthase I%2C chloroplastic	ketoacylsynt	1
gene-BC332_16539	1.14984	Phosphoethanolamine Nmethyltransferase	Methyltransf_11	1
gene-BC332_07746	1.82822	Protein CUPSHAPED COTYLEDON 3	NAM	1
gene-BC332_21785	3.3456	Cysteine synthase	PALP	1
gene-BC332_31146	-1.6907	Xylem cysteine proteinase 1	Peptidase_C1	1
gene-BC332_07476	1.79874	Metacaspase2	Peptidase_C14	1
gene-BC332_23328	1.06977	hypothetical protein	PP2C	1
novel.12474	-1.35127	PF07727:Reverse transcriptase (RNAdependent DNA polymerase)|PF00665:Integrase core domain|PF14223:gagpolypeptide of LTR copiatype	rve	1
gene-BC332_12025	1.95637	SerpinZX	Serpin	1
gene-BC332_30414	-4.31531	Shikimate kinase%2C chloroplastic	SKI	1
gene-BC332_09012	2.26416	hypothetical protein	Str_synth	1
gene-BC332_31266	2.91768	TMV resistance protein N	TIR	1
gene-BC332_32359	6.19442	Polyubiquitin	ubiquitin	1
