# Supplementary material for: Establishment of in vitro regeneration system and molecular analysis of early development of somatic callus in Capsicum chinense and Capsicum baccatum
Source: Front Plant Sci. 2022 Nov 17;13:1025497. doi: 10.3389/fpls.2022.1025497 (PMC9714296; doi:10.3389/fpls.2022.1025497)
Supplement: Supplementary file 9 [file Table_9.xlsx]

## Sheet: primer
Supplementary Table S9. Primer of RT-qPCR.
Name	Forward 5'-3'	Reverse 5'-3'
qBC332_22660	GGGGAGACGCAGAAGAGGAG	ACCCATTGGATGGTCGAAGC
qBC332_27239	ATTCAAACTATCCTAGCCTTGC	ATCACCAACAGTCCTCCATT
qBC332_07137	TAAACCTCAACATCACTCCCATCA	GCTTCCCTGACCTCTGACCC
qBC332_30829	CTGACTATTTGGCGTCTGCT	TAACTTGTGGCTCTTGGATT
qBC332_08327	CGCTCTGCTTTACTTGCTTG	ACCCTTGTCCTCTACCCTTG
qBC332_20033	ATCAGTTCTATTTCCACTCCCACA	CGAAGCACATCACCCATCCT
qBC332_04595	AGGGAAGTATTCGGTGAGGA	TTGACGTGCGAACCAAGTAG
qBC332_29560	CATGTCGGAAGAAGAGTTTG	AGGATCAATGCTTTGTGAAG
qBC332_21874	TTGGTTGGGACTTGAATGCG	ACTTGCCACAGGAGGCTTGA
qActin	AATCAATCCCTCCACCTCTTCACTC	CATCACCAGCAAATCCAGCCTT
